# Supplementary material for: Metabolomic Profiling of Fresh Goji (Lycium barbarum L.) Berries from Two Cultivars Grown in Central Italy: A Multi-Methodological Approach
Source: MDPI journal article supplement (doi:10.3390/molecules26175412), 2021-09-06
Supplement: s1 [file s1]

# Metabolomic profiling of fresh Goji (*Lycium barbarum* L.) berries from two cultivars grown in Center Italy: a multi-methodological approach

Mattia Spano<sup>1,†</sup>, Alessandro Maccelli<sup>1,†</sup>, Giacomo Di Matteo<sup>1</sup>, Cinzia Ingallina<sup>1</sup>, Mariangela Biava<sup>1</sup>, Maria Elisa Crestoni<sup>1,\*</sup>, Jean-Xavier Bardaud<sup>2</sup>, Anna Maria Giusti<sup>3</sup>, Alessia Mariano<sup>4</sup>, Anna Scotto D'Abusco<sup>4</sup>, Anatoly P. Sobolev<sup>5,\*</sup>, Alba Lasalvia<sup>1</sup>, Simonetta Fornarini<sup>1</sup>, Luisa Mannina<sup>1</sup>

<sup>1</sup> Department of Chemistry and Technology of Drugs, Sapienza University of Rome, Piazzale Aldo Moro 5, Rome 00185, Italy; mattia.spano@uniroma1.it (M.S.); alessandro.maccelli@uniroma1.it (A.M.); giacomo.dimatteo@uniroma1.it (G.D.M.); cinzia.ingallina@uniroma1.it (C.I.); mariangela.biava@uniroma1.it (M.B.); alba.lasalvia@uniroma1.it (A.L.); simonetta.fornarini@uniroma1.it (S.F.); luisa.mannina@uniroma1.it (L.M.)

<sup>2</sup> Institut de Chimie Physique, CLIO, Université Paris Saclay, Bât 200, BP34, Orsay Cedex 91898, France; j.xavier.bardaud@gmail.com

<sup>3</sup> Department of Experimental Medicine, Sapienza University of Rome, P.le Aldo Moro 5, Rome 00185, Italy; annamaria.giusti@uniroma1.it

<sup>4</sup> Department of Biochemical Sciences, Sapienza University of Rome, P.le Aldo Moro 5, Rome 00185, Italy; alessia.mariano@uniroma1.it (A.M.); anna.scottodabusco@uniroma1.it (A.S.D.)

<sup>5</sup> Institute for Biological Systems, Magnetic Resonance Laboratory "Segre-Capitani", CNR, Via Salaria Km 29.300, Monterotondo 00015, Italy

† These authors contributed equally to this work

\* Correspondence: mariaelisa.crestoni@uniroma1.it (M.E.C.), anatoly.sobolev@cnr.it (A.P.S.)

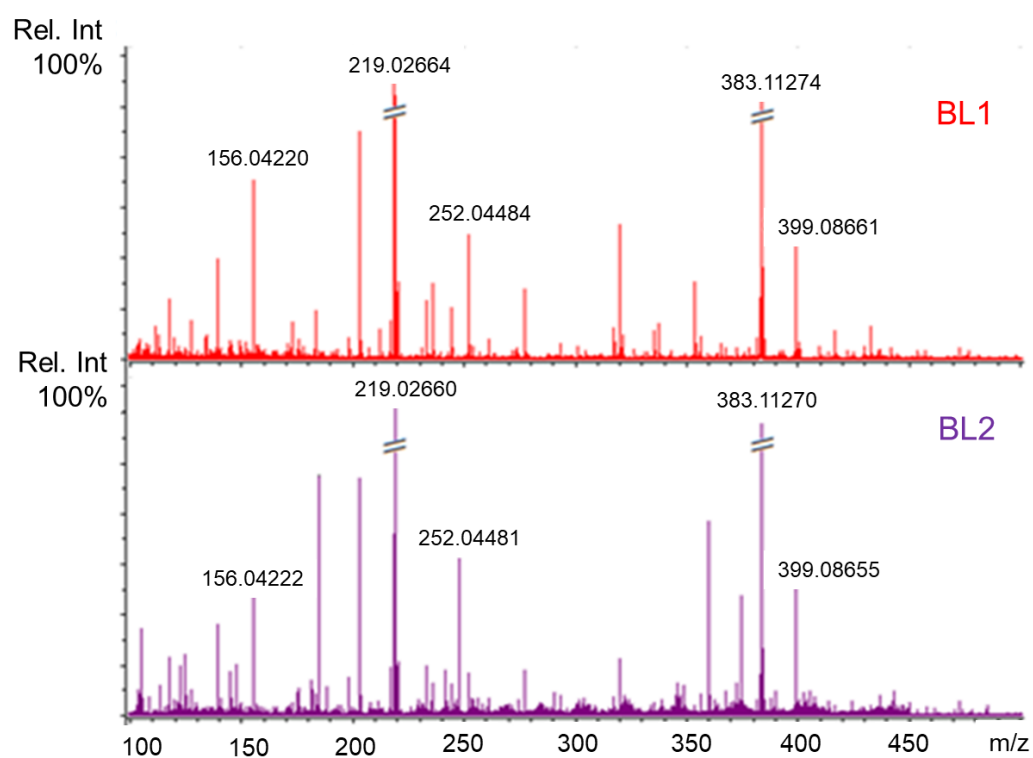

**Figure S1.** Enlargement of ESI(+) FT-ICR mass spectra Goji berries samples: BL1 (red profile), and BL2 (purple profile).

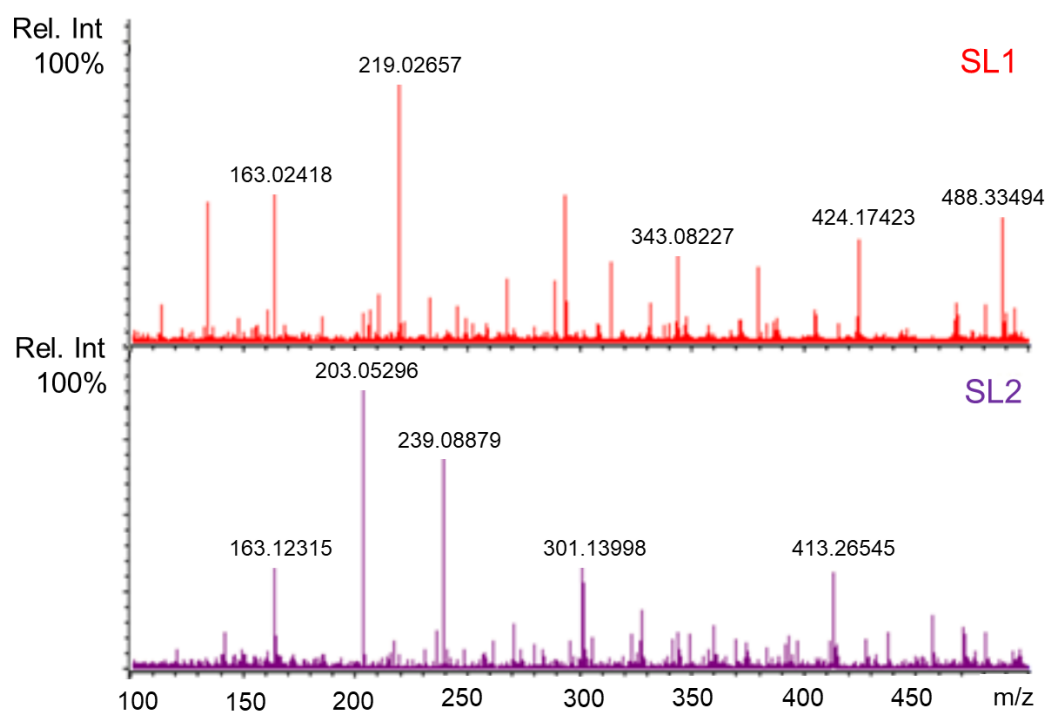

**Figure S2.** Enlargement of ESI(+) FT-ICR mass spectra Goji berries samples: SL1 (red profile), and SL2 (purple profile).

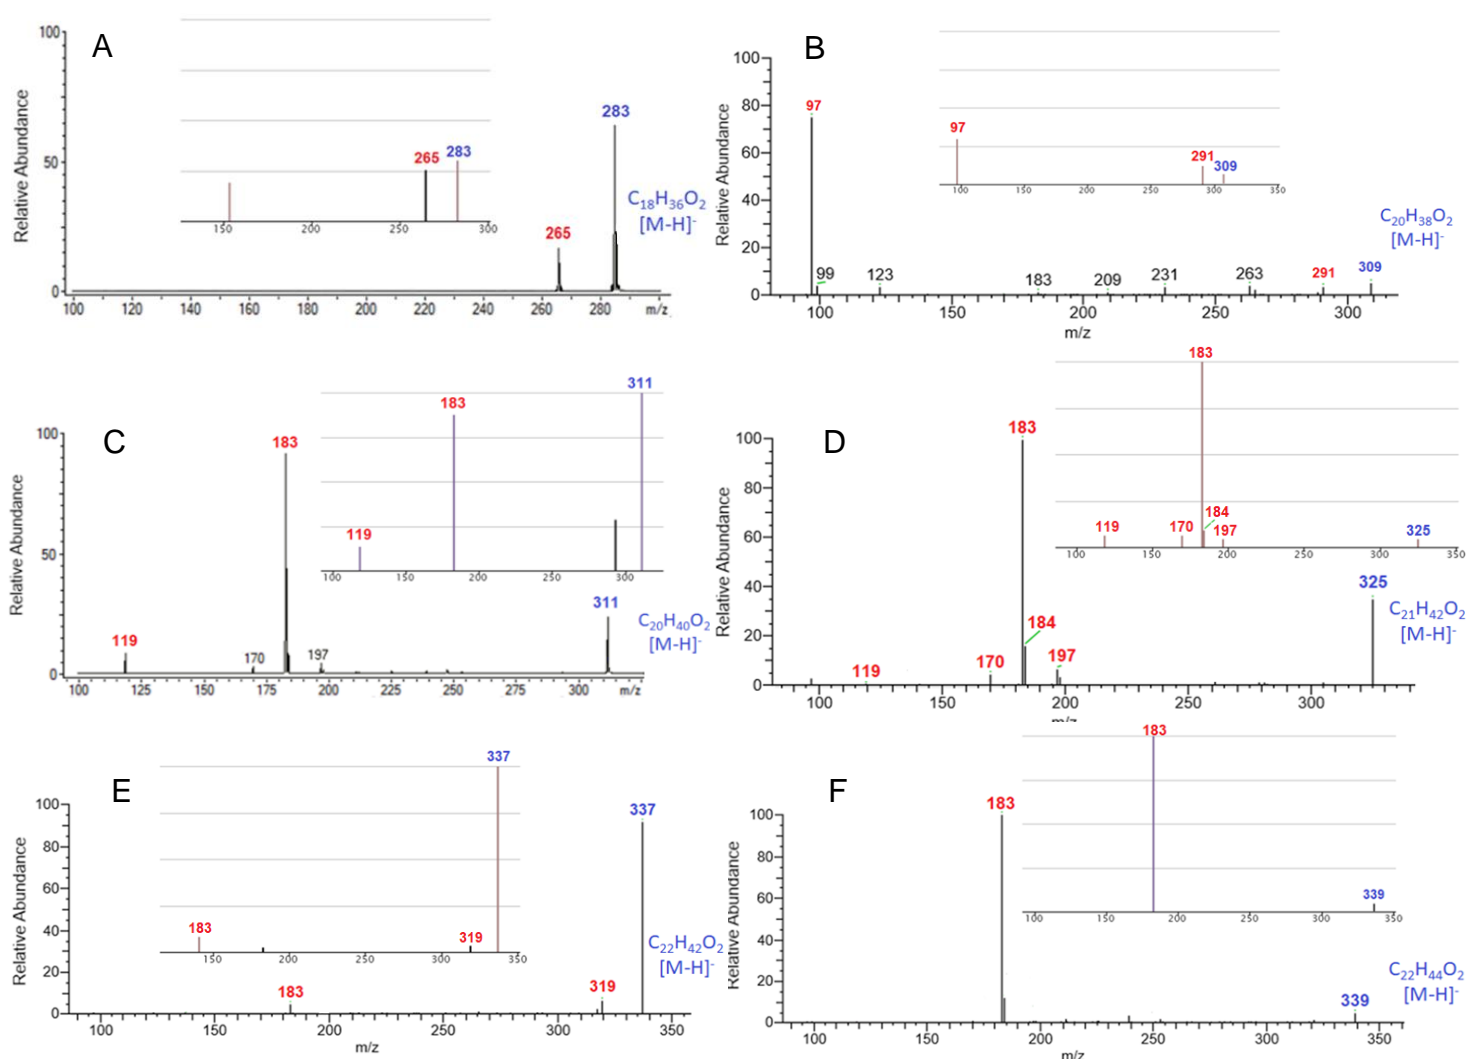

**Figure S3.** Comparison between experimental ESI(-) CID assay performed with LTQ XL ion trap and reference data obtained from Metlin database has allowed to confirm the assignments of the following peaks at : A) m/z 283 (stearic acid; B) m/z 309 (eicosenoic acid); C) m/z 311 (eicosanoic acid); D) m/z 325 (eicosanoic acid, methyl ester); E) m/z 337 (docosenoic acid); F) m/z 339 (docosanoic acid).

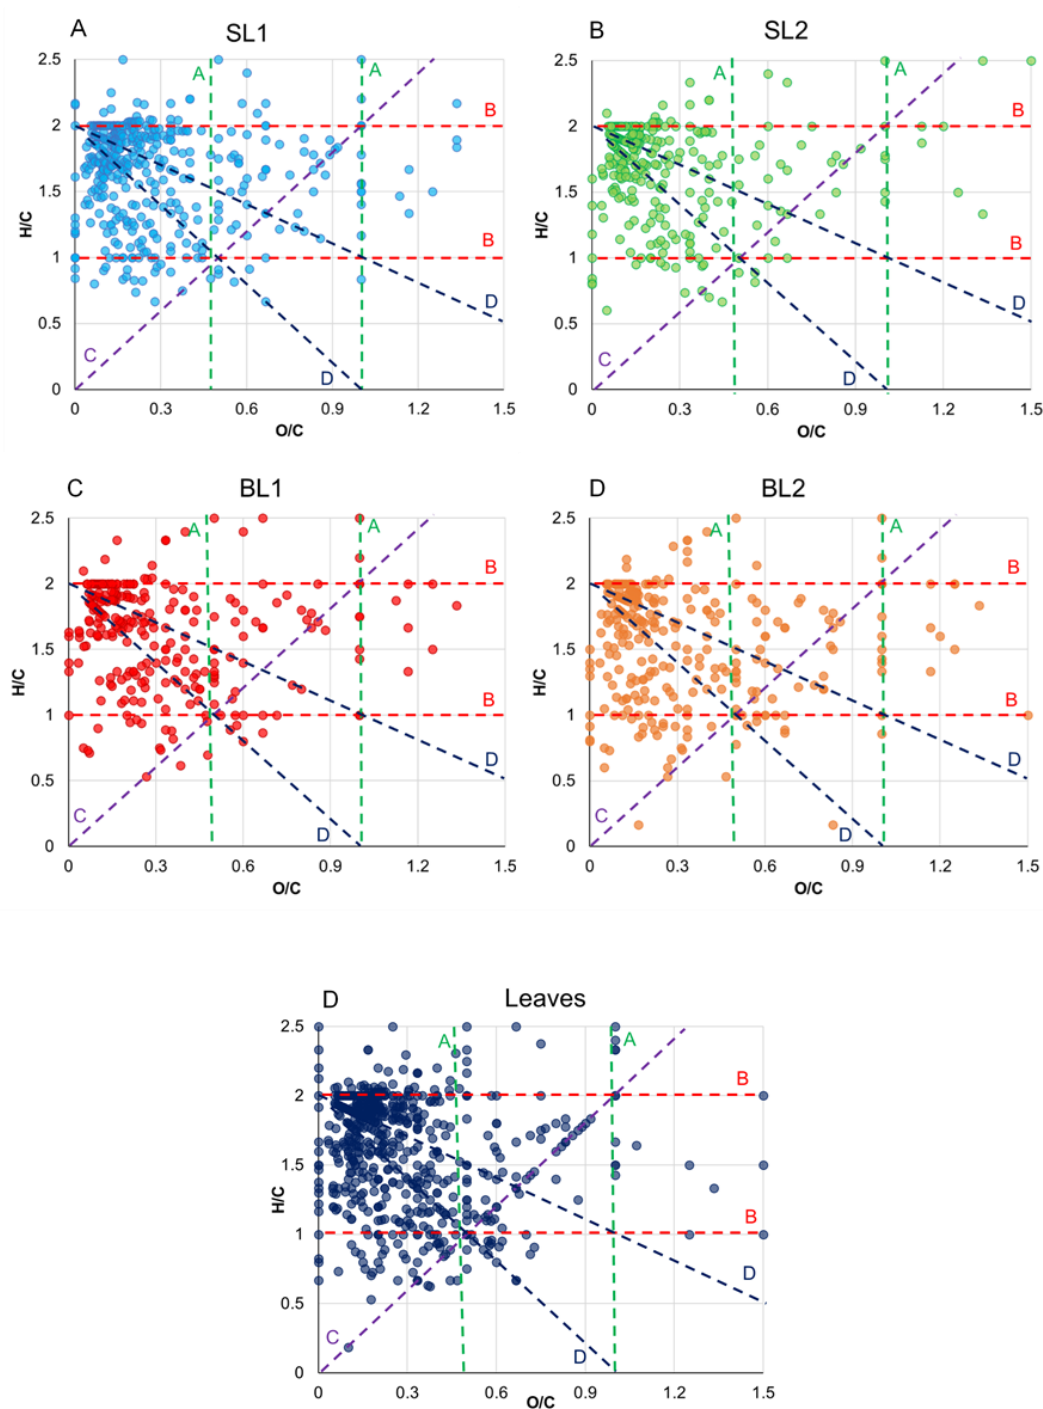

**Figure S4.** Van Krevelen diagram obtained by ESI MS analysis of hydroalcoholic and organic extracts from BL and SL fruits and BL leaves. The diagrams display broken lines with the following meaning: (A) lines related to (de)hydrogenation paths; (B) lines associated to oxidation or reduction reactions; (C) lines that describe hydration and condensation processes; (D) lines that correspond to (de)methylation paths.

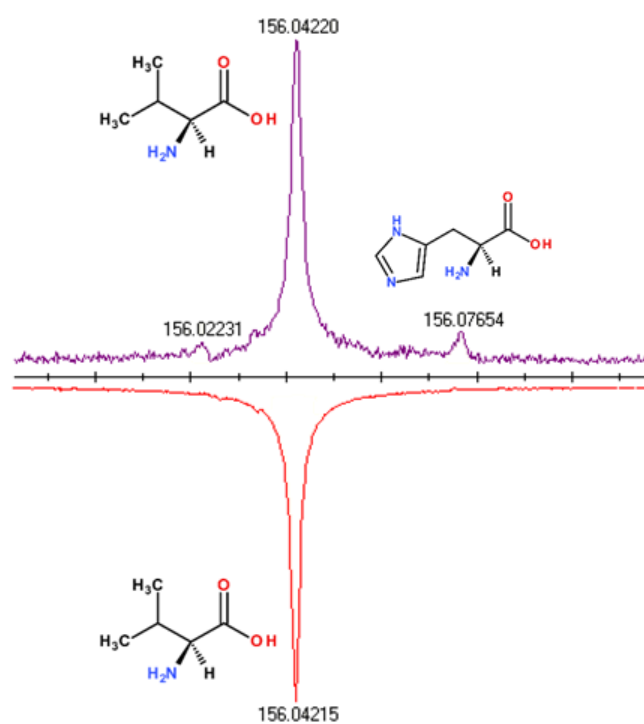

**Figure S5.** Differentiation between isobaric species by ESI(+) FT-ICR MS: histidine (m/z 156.07654) and valine (m/z 156.04220) are discriminated in BL1 (purple profile). Otherwise, histidine appears lacking in SL2 (red profile).

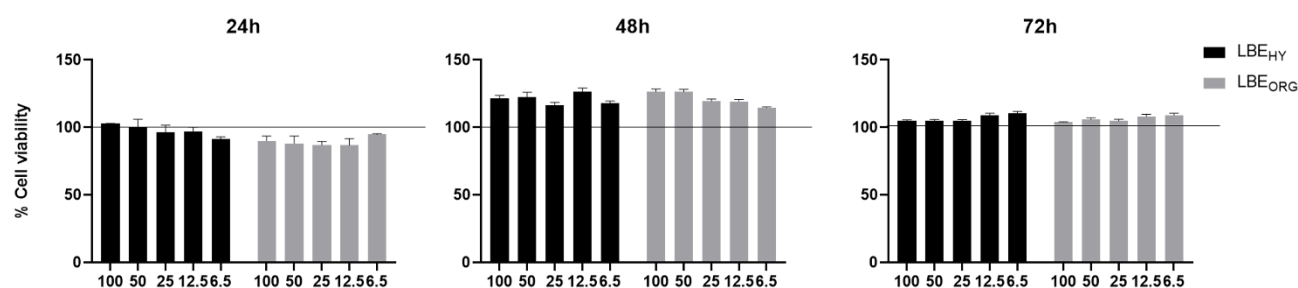

**Figure S6.** Cell viability was assessed by the MTS colorimetric method. MG63 cells were treated with different concentrations, 100 µg/mL, 50 µg/mL, 25 µg/mL, 12.5 µg/mL and 6.5 µg/mL, of Lycium barbarum Hydro-alcoholic extract (LBEHY) dissolved in de-ionized water and Lycium barbarum organic extract (LBEORG) dissolved in DMSO, for 24, 48, and 72 h. Cell viability of treated samples was normalized to the untreated cells, which is reported as 100% and represented by a horizontal line.

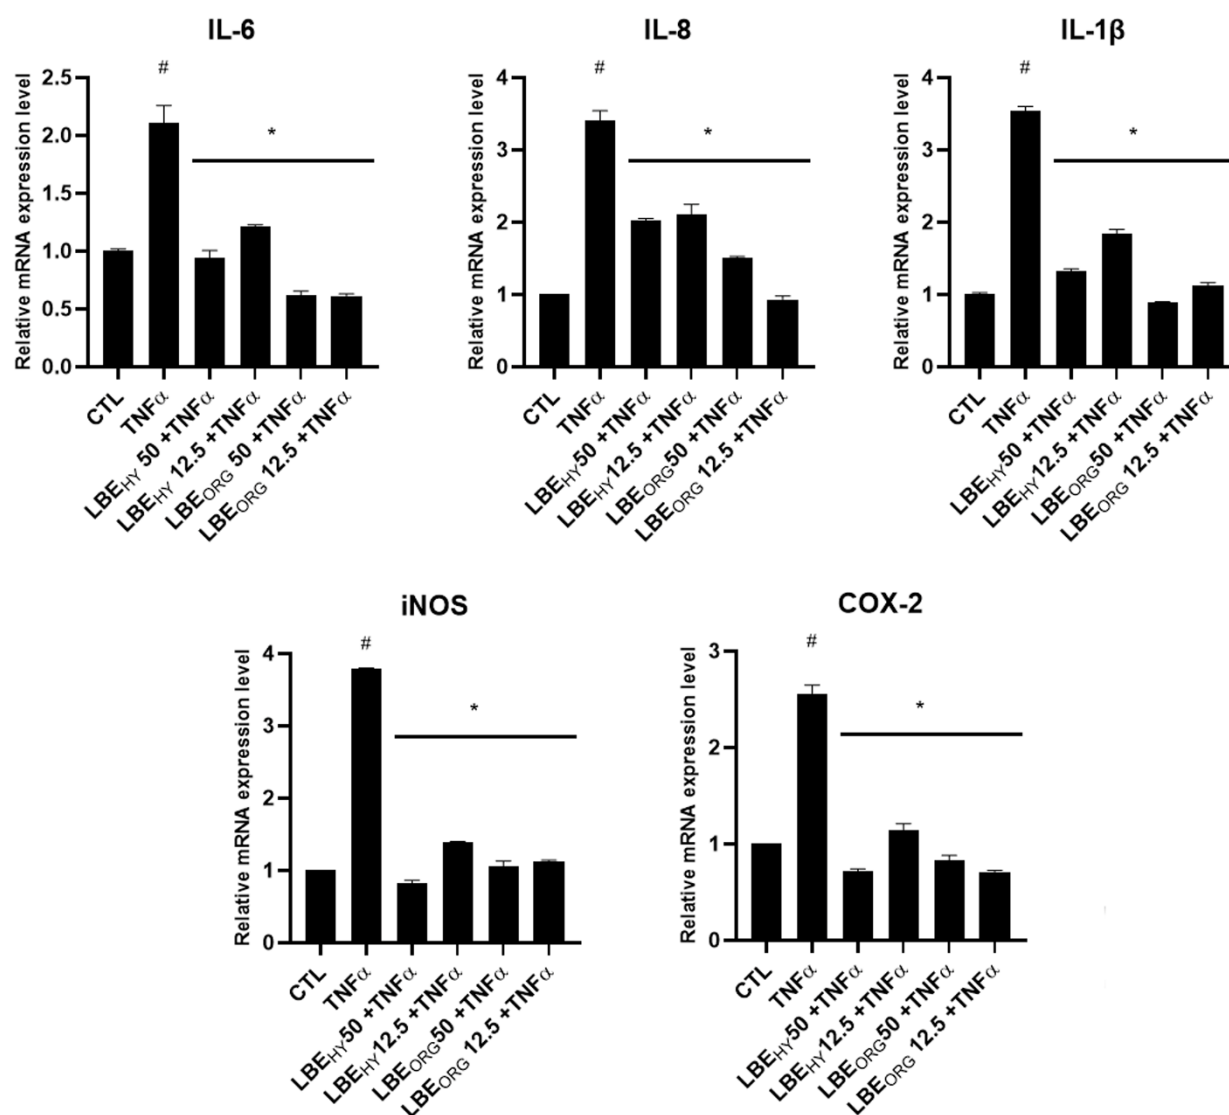

**Figure S7.** Effects of LBEHY and LBEORG extracts on IL-6, IL-8, IL-1β, iNOS and COX-2 mRNA expression level in MG63 cells. After 2 hour-treatment with 0.1 mg/mL of 50 and 12.5 µg/mL Lycium barbarum Hydro-alcoholic extract (LBEHY) dissolved in deionized water and Lycium barbarum organic extract (LBEORG) dissolved in DMSO, cells were stimulated for 30 min with 10 ng/mL of TNFα. Cells were harvested and mRNA was extracted and analyzed by RT-PCR. IL-6, IL-8, IL-1β, iNOS and COX-2

mRNA levels were reported as relative mRNA expression level with respect to 18S mRNA ( $2^{-\Delta\Delta C_t}$  method). Results are expressed as mean  $\pm$  S.E.M. of data obtained by three different experiments. \* $p < 0.05$ ; # $p < 0.05$ ; \* represents the comparison between TNF $\alpha$  and LBE-treated samples; # represents the comparison between untreated (CTL) and TNF $\alpha$ -stimulated samples.

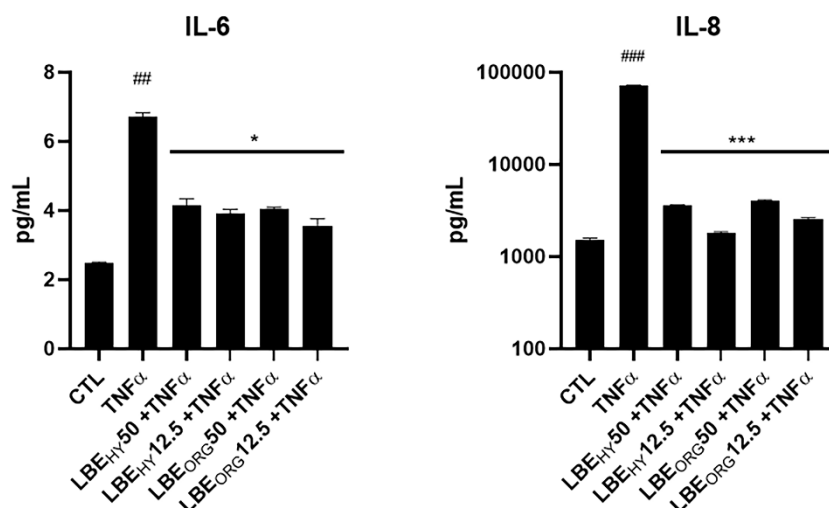

**Figure S8.** Measure of IL-6 and IL-8 secretion in cell culture medium. Cells were left untreated or treated with 10 ng/mL of TNF $\alpha$  in absence or in presence of 50 and 12.5  $\mu$ g/mL Lycium barbarum Hydro-alcoholic extract (LBEHY) dissolved in deionized water and Lycium barbarum organic extract (LBEORG) dissolved in DMSO, for 5 h and then analysed for IL-6 and IL-8 by ELISA method. Results (in pg/mL) are expressed as mean  $\pm$  standard error, obtained in three different experiments. \* $p < 0.05$ ; \*\*\* $p < 0.005$ ; ## $p < 0.01$ ; ### $p < 0.005$ . \* represents the comparison between TNF $\alpha$  and LBE-treated samples; # represents the comparison between untreated (CTL) and TNF $\alpha$ -stimulated samples.



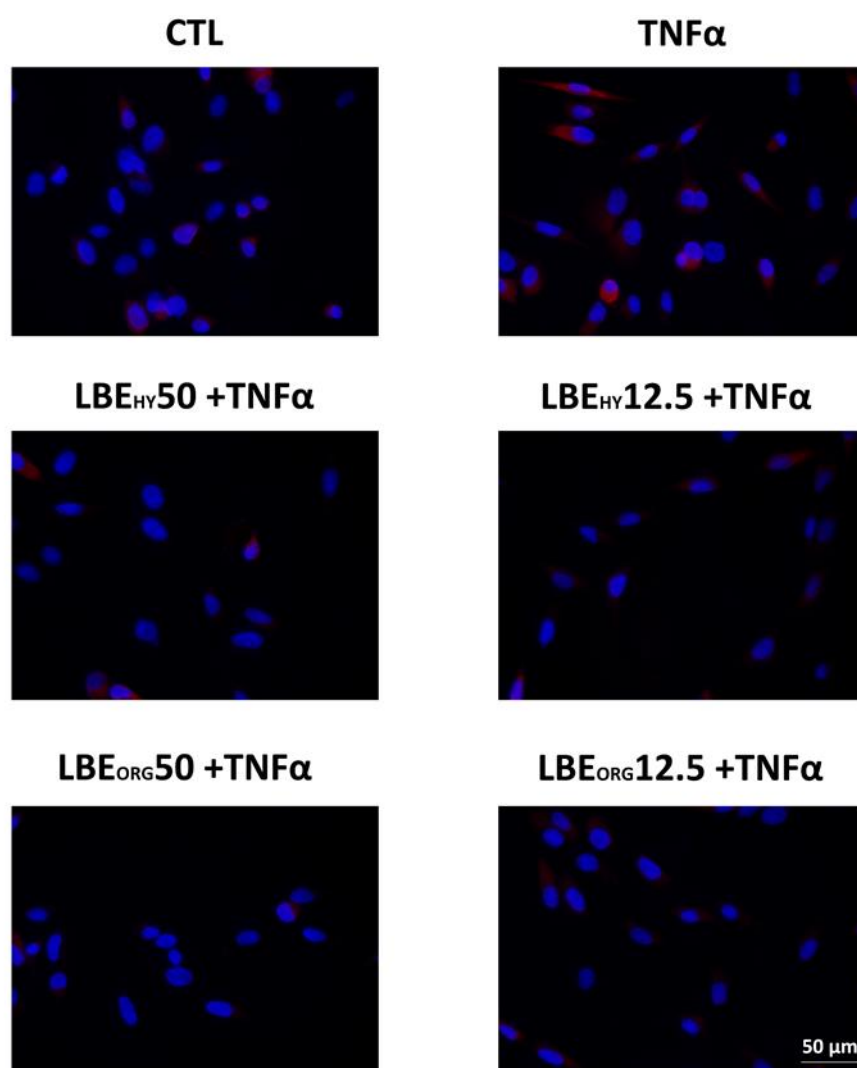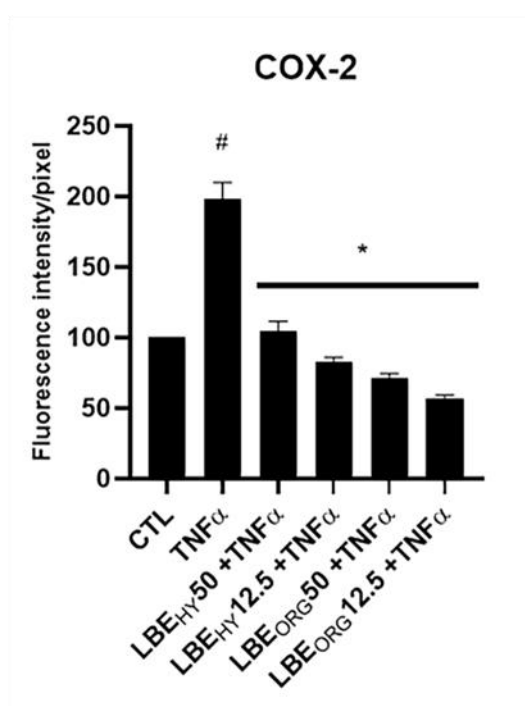

**Figure S9.** Effects of LBEHY and LBEORG extracts on COX-2 protein production. Upper panel: Cells were left untreated or treated with 10 ng/mL of TNF $\alpha$  in absence or in presence of 50 and 12.5  $\mu$ g/mL Lycium barbarum Hydro-alcoholic extract (LBEHY) dissolved in deionized water and Lycium barbarum organic extract (LBEORG) dissolved in DMSO, for 5 h and then analyzed by immunofluorescence using anti-COX-2 primary antibody and Alexa Fluor 568 (red) secondary antibody. Nuclei were stained with DAPI (original magnification 40 $\times$ ), images are representative of two different experiments. Lower panel: The pixel intensities, in the region of interest, were obtained by ImageJ. \* $p < 0.05$ ; # $p < 0.05$ ; \* represents the comparison between TNF $\alpha$  and LBE-treated samples; # represents the comparison between untreated (CTL) and TNF $\alpha$ -stimulated samples.

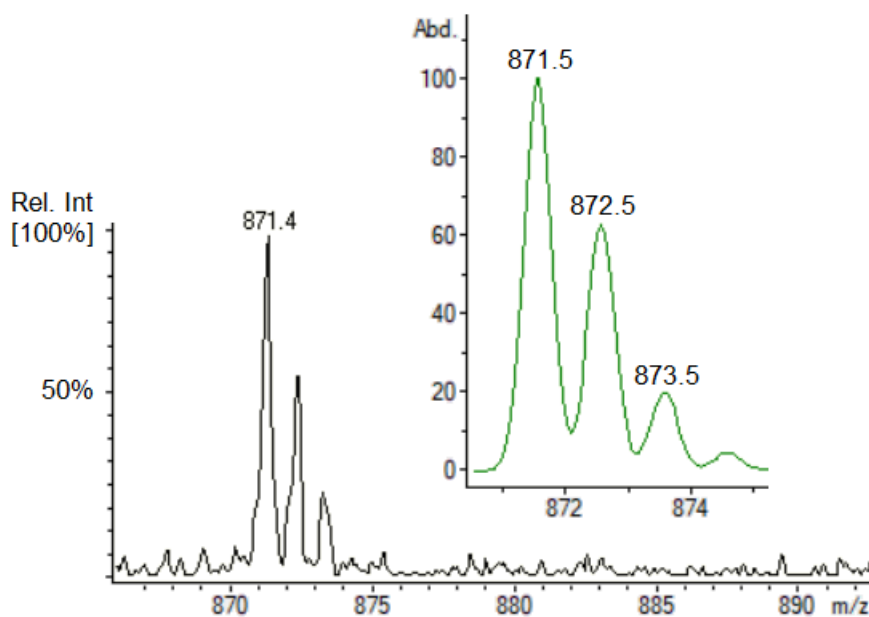

**Figure S10.** Enlargement of ESI(+) Esquire 6000 mass spectrum of organic extract of Big Lifeberry leaves showing protonated pheophytin a, ( $[C_{55}H_{74}N_4O_5 + H]^+$ , monoisotopic peak at m/z 871.4). The theoretical isotopic pattern is shown in the excerpt.

Table S1: Untargeted metabolic profiling of Goji Berries hydroalcoholic extracts by ESI(+) FT-R MS

| #  | Putative annotation <sup>a</sup> | Ion                 | Formula (M) | m/z <sub>Theo</sub> <sup>b</sup> | BL1 <sup>c</sup> | ppm  | BL2 <sup>c</sup> | ppm  | SL1 <sup>c</sup> | ppm  | SL2 <sup>c</sup> | ppm |
|----|----------------------------------|---------------------|-------------|----------------------------------|------------------|------|------------------|------|------------------|------|------------------|-----|
| 1  | 4-Aminopyridine                  | [M+H] <sup>+</sup>  | C5H6N2      | 95.06037                         |                  |      |                  |      | 1.1E+06          | -0.8 |                  |     |
| 2  | Guanidine                        | [M+K] <sup>+</sup>  | CH5N3       | 98.01151                         |                  |      |                  |      | 4.8E+05          | -1.6 |                  |     |
| 3  | Glycine                          | [M+Na] <sup>+</sup> | C2H5NO2     | 98.02125                         |                  |      |                  |      |                  |      | 1.2E+05          | 2.3 |
| 4  | Ethanolamine                     | [M+K] <sup>+</sup>  | C2H7NO      | 100.01592                        |                  |      |                  |      | 4.4E+05          | -2.1 |                  |     |
| 5  | Allyl isothiocyanate             | [M+H] <sup>+</sup>  | C4H5NS      | 100.02155                        |                  |      |                  |      | 9.2E+05          | -0.2 |                  |     |
| 6  | Cadaverine                       | [M+H] <sup>+</sup>  | C5H14N2     | 103.12297                        |                  |      |                  |      |                  |      | 1.4E+05          | 0.3 |
| 7  | Choline                          | [M] <sup>+</sup>    | C5H14NO     | 104.10699                        | 5.3E+05          | 1.2  | 1.5E+06          | 2.3  | 9.9E+05          | -2.3 | 1.6E+05          | 0.6 |
| 8  | S-Methylthioglycolate            | [M+H] <sup>+</sup>  | C3H6O2S     | 107.01613                        |                  |      |                  |      | 8.4E+05          | -1.1 |                  |     |
| 9  | Iminoglycine                     | [M+K] <sup>+</sup>  | C2H3NO2     | 111.97954                        |                  |      |                  |      | 5.2E+05          | 1.4  |                  |     |
| 10 | Alanine                          | [M+Na] <sup>+</sup> | C3H7NO2     | 112.03690                        |                  |      |                  |      |                  |      | 2.1E+05          | 1.7 |
| 11 | Glycerol                         | [M+Na] <sup>+</sup> | C3H8O3      | 115.03656                        |                  |      |                  |      |                  |      | 1.1E+05          | 0.8 |
| 12 | 3-Hydroxyhexanal                 | [M+H] <sup>+</sup>  | C6H12O2     | 117.09101                        | 3.9E+05          | -2.1 |                  |      | 6.8E+05          | 1.1  |                  |     |
| 13 | L-Valine                         | [M+H] <sup>+</sup>  | C5H11NO2    | 118.08626                        | 2.8E+06          | -1.4 | 5.2E+06          | 0.5  | 4.3E+05          | 1.9  | 2.4E+05          | 0.2 |
| 14 | 1-Hexen-1-ol                     | [M+Na] <sup>+</sup> | C6H12O      | 123.07804                        |                  |      | 5.0E+05          | 2.9  | 4.3E+05          | 2.9  |                  |     |
| 15 | Malonic acid                     | [M+Na] <sup>+</sup> | C3H4O4      | 127.00018                        |                  |      |                  |      |                  |      | 1.1E+05          | 1.0 |
| 16 | L-Lactic acid                    | [M+K] <sup>+</sup>  | C3H6O3      | 128.99485                        | 5.2E+05          | 0.9  |                  |      |                  |      |                  |     |
| 17 | 3-Aminopropane-1,2-diol          | [M+K] <sup>+</sup>  | C3H9NO2     | 130.02649                        |                  |      | 4.4E+05          | 2.2  |                  |      |                  |     |
| 18 | D-Ornithine                      | [M+H] <sup>+</sup>  | C5H12N2O2   | 133.09715                        | 4.5E+05          | 0.9  | 4.5E+05          | 1.2  |                  |      |                  |     |
| 19 | 2-Hydroxypyridine                | [M+K] <sup>+</sup>  | C5H5NO      | 134.00027                        |                  |      | 5.0E+05          | -2.3 |                  |      | 2.2E+05          | 1.6 |
| 20 | D-Proline                        | [M+Na] <sup>+</sup> | C5H9NO2     | 138.05255                        | 3.5E+05          | 0.3  | 3.5E+05          | 2.8  | 1.9E+06          | -0.8 |                  |     |
| 21 | Tyramine                         | [M+H] <sup>+</sup>  | C8H11NO     | 138.09134                        |                  |      |                  |      | 4.9E+05          | -2.2 |                  |     |
| 22 | Butyl acetate                    | [M+Na] <sup>+</sup> | C6H12O2     | 139.07295                        |                  |      |                  |      | 4.5E+05          | -2.4 |                  |     |
| 23 | 4-Hydroxyphenylethanol           | [M+H] <sup>+</sup>  | C8H10O2     | 139.07536                        |                  |      |                  |      | 4.5E+05          | -2.4 |                  |     |
| 24 | L-Valine                         | [M+Na] <sup>+</sup> | C5H11NO2    | 140.06820                        | 4.3E+06          | -0.9 | 8.3E+06          | 0.0  | 4.8E+05          | 0.6  |                  |     |
| 25 | 2,4-Diaminobutyric acid          | [M+Na] <sup>+</sup> | C4H10N2O2   | 141.06345                        | 4.4E+05          | -1.7 | 1.0E+06          | 2.3  | 5.4E+05          | 1.8  |                  |     |
| 26 | L-Lysine                         | [M+H] <sup>+</sup>  | C6H14N2O2   | 147.11280                        | 3.8E+05          | 1.0  | 5.9E+05          | 1.0  |                  |      |                  |     |

Table S1: Untargeted metabolic profiling of Goji Berries hydroalcoholic extracts by ESI(+) FT-R MS

| #  | Putative annotation <sup>a</sup> | Ion                 | Formula (M) | m/z <sub>Theo</sub> <sup>b</sup> | BL1 <sup>c</sup> | ppm  | BL2 <sup>c</sup> | ppm  | SL1 <sup>c</sup> | ppm  | SL2 <sup>c</sup> | ppm  |
|----|----------------------------------|---------------------|-------------|----------------------------------|------------------|------|------------------|------|------------------|------|------------------|------|
| 27 | 2-Hydroxyethylphosphonate        | [M+Na] <sup>+</sup> | C2H7O4P     | 148.99742                        | 3.8E+05          | -0.7 |                  |      | 2.2E+06          | 2.3  |                  |      |
| 28 | L-Methionine                     | [M+H] <sup>+</sup>  | C5H11NO2S   | 150.05833                        |                  |      |                  |      | 1.2E+06          | -2.2 |                  |      |
| 29 | Pyroglutamic acid                | [M+Na] <sup>+</sup> | C5H7NO3     | 152.03181                        | 3.7E+05          | 2.7  | 3.7E+05          | -1.7 |                  |      |                  |      |
| 30 | epsilon-Caprolactam              | [M+K] <sup>+</sup>  | C6H11NO     | 152.04722                        |                  |      | 4.6E+05          | 2.7  |                  |      |                  |      |
| 31 | 2Z-Hexenoic acid                 | [M+K] <sup>+</sup>  | C6H10O2     | 153.03124                        |                  |      | 4.0E+05          | 2.9  |                  |      |                  |      |
| 32 | 1-Octanol                        | [M+Na] <sup>+</sup> | C8H18O      | 153.12499                        |                  |      |                  |      | 1.6E+06          | -2.1 |                  |      |
| 33 | L-Proline                        | [M+K] <sup>+</sup>  | C5H9NO2     | 154.02649                        | 4.2E+05          | -0.6 | 4.4E+05          | 0.3  |                  |      |                  |      |
| 34 | L-Valine                         | [M+K] <sup>+</sup>  | C5H11NO2    | 156.04214                        | 8.5E+06          | -0.8 | 1.1E+07          | 0.3  | 2.4E+06          | 0.0  | 1.0E+05          | -2.1 |
| 35 | L-Histidine                      | [M+H] <sup>+</sup>  | C6H9N3O2    | 156.07675                        | 1.2E+06          | 2.9  | 1.2E+06          | -1.4 | 1.6E+05          | -1.7 |                  |      |
| 36 | Cinnamyl alcohol                 | [M+Na] <sup>+</sup> | C9H10O      | 157.06239                        | 9.6E+05          | -0.3 | 9.6E+05          | 2.1  |                  |      |                  |      |
| 37 | 2-Isopropylmaleate               | [M+H] <sup>+</sup>  | C7H10O4     | 159.06519                        |                  |      | 5.7E+05          | 1.2  |                  |      |                  |      |
| 38 | Valerylglycine                   | [M+H] <sup>+</sup>  | C7H13NO3    | 160.09682                        |                  |      | 5.1E+05          | -2.2 |                  |      |                  |      |
| 39 | Allicin                          | [M+H] <sup>+</sup>  | C6H10OS2    | 163.02458                        |                  |      |                  |      | 1.5E+06          | -2.5 |                  |      |
| 40 | (R)-Nicotine                     | [M+H] <sup>+</sup>  | C10H14N2    | 163.12297                        | 3.5E+05          | 2.1  | 5.4E+05          | 0.8  |                  |      | 2.6E+05          | 1.1  |
| 41 | 2-O-Methylcytosine               | [M+K] <sup>+</sup>  | C5H7N3O     | 164.02207                        |                  |      |                  |      | 2.6E+06          | 3.0  |                  |      |
| 42 | Thymine                          | [M+K] <sup>+</sup>  | C5H6N2O2    | 165.00609                        | 7.6E+05          | 2.6  | 7.6E+05          | 1.9  |                  |      |                  |      |
| 43 | (E)-p-coumaric acid              | [M+H] <sup>+</sup>  | C9H8O3      | 165.05462                        |                  |      |                  |      | 6.8E+05          | 0.1  |                  |      |
| 44 | 2,3,6-Trihydroxypyridine         | [M+K] <sup>+</sup>  | C5H5NO3     | 165.99010                        | 4.9E+05          | 1.4  | 4.9E+05          | 0.8  |                  |      | 3.2E+05          | -2.6 |
| 45 | (-)-Hygrolone                    | [M+Na] <sup>+</sup> | C8H17NO     | 166.12023                        |                  |      | 7.0E+05          | 2.4  | 7.0E+05          | 2.7  |                  |      |
| 46 | Dihydrothymine                   | [M+K] <sup>+</sup>  | C5H8N2O2    | 167.02174                        |                  |      |                  |      | 2.1E+06          | -0.4 |                  |      |
| 47 | 2-methyl-hexanoic acid           | [M+K] <sup>+</sup>  | C7H14O2     | 169.06254                        |                  |      |                  |      |                  |      | 1.2E+05          | -0.5 |
| 48 | Leucine                          | [M+K] <sup>+</sup>  | C6H13NO2    | 170.05779                        |                  |      | 4.8E+05          | 1.8  | 1.4E+06          | -2.6 | 1.3E+05          | -2.0 |
| 49 | Lupinine                         | [M+H] <sup>+</sup>  | C10H19NO    | 170.15394                        |                  |      | 5.0E+05          | 3.0  | 1.8E+06          | 2.1  |                  |      |
| 50 | Asparagine                       | [M+K] <sup>+</sup>  | C4H8N2O3    | 171.01665                        | 7.3E+05          | -0.9 | 7.6E+05          | 0.2  |                  |      |                  |      |
| 51 | Hydrocinnamic acid               | [M+Na] <sup>+</sup> | C9H10O2     | 173.05730                        | 1.4E+06          | 1.0  | 1.2E+06          | 1.7  | 1.0E+06          | 0.4  |                  |      |
| 52 | L-Arginine                       | [M+H] <sup>+</sup>  | C6H14N4O2   | 175.11895                        | 3.8E+05          | 1.0  | 2.0E+06          | 0.3  |                  |      | 2.2E+05          | 0.7  |

Table S1: Untargeted metabolic profiling of Goji Berries hydroalcoholic extracts by ESI(+) FT-R MS

| #  | Putative annotation <sup>a</sup>                 | Ion                 | Formula (M) | m/z <sub>Theo</sub> <sup>b</sup> | BL1 <sup>c</sup> | ppm  | BL2 <sup>c</sup> | ppm  | SL1 <sup>c</sup> | ppm  | SL2 <sup>c</sup> | ppm  |
|----|--------------------------------------------------|---------------------|-------------|----------------------------------|------------------|------|------------------|------|------------------|------|------------------|------|
| 53 | Monodehydroascorbate                             | [M+H] <sup>+</sup>  | C6H7O6      | 176.03154                        | 6.9E+05          | -1.5 | 5.1E+05          | -0.2 | 6.1E+05          | -0.2 |                  |      |
| 54 | N-Carboxyethyl-g-aminobutyric acid               | [M+H] <sup>+</sup>  | C7H13NO4    | 176.09173                        | 8.8E+05          | -0.5 | 2.5E+06          | -0.1 |                  |      | 5.0E+05          | 2.9  |
| 55 | Tecomine                                         | [M+H] <sup>+</sup>  | C11H17NO    | 180.13829                        |                  |      |                  |      | 1.2E+06          | -0.7 |                  |      |
| 56 | L-Dihydroorotic acid                             | [M+Na] <sup>+</sup> | C5H6N2O4    | 181.02198                        | 3.7E+05          | 0.0  | 3.7E+05          | 0.1  |                  |      |                  |      |
| 57 | 4-Hydroxy-L-glutamic acid                        | [M+Na] <sup>+</sup> | C5H7NO5     | 184.02164                        |                  |      |                  |      | 9.9E+05          | -0.5 |                  |      |
| 58 | L-Lysinamide                                     | [M+K] <sup>+</sup>  | C6H15N3O    | 184.08467                        |                  |      |                  |      | 1.1E+06          | -2.1 |                  |      |
| 59 | D-Glutamine                                      | [M+K] <sup>+</sup>  | C5H10N2O3   | 185.03230                        |                  |      |                  |      |                  |      | 9.7E+04          | -0.7 |
| 60 | Tridecane                                        | [M+H] <sup>+</sup>  | C13H28      | 185.22638                        |                  |      |                  |      | 1.1E+06          | -0.7 |                  |      |
| 61 | L-Methionine                                     | [M+K] <sup>+</sup>  | C5H11NO2S   | 188.01421                        |                  |      |                  |      |                  |      | 8.3E+04          | 0.9  |
| 62 | D-Ribose                                         | [M+K] <sup>+</sup>  | C5H10O5     | 189.01598                        |                  |      | 5.5E+05          | -2.5 |                  |      |                  |      |
| 63 | Caffeyl alcohol                                  | [M+Na] <sup>+</sup> | C9H10O3     | 189.05221                        |                  |      |                  |      |                  |      | 2.4E+05          | 2.3  |
| 64 | 3-Isopropylcatechol                              | [M+K] <sup>+</sup>  | C9H12O2     | 191.04689                        | 4.2E+05          | -2.9 |                  |      |                  |      |                  |      |
| 65 | Thiobenzamide S-oxide                            | [M+K] <sup>+</sup>  | C7H7NO5     | 191.98799                        |                  |      |                  |      | 3.0E+06          | 2.3  |                  |      |
| 66 | 3-Hydroxyanthranilic acid                        | [M+K] <sup>+</sup>  | C7H7NO3     | 192.00575                        |                  |      |                  |      | 7.5E+05          | -2.5 |                  |      |
| 67 | 2-Amino-3,7-dideoxy-D-threo-hept-6-ulosonic acid | [M+H] <sup>+</sup>  | C7H13NO5    | 192.08665                        | 4.1E+05          | 0.6  | 4.2E+05          | 0.5  |                  |      | 2.0E+05          | 0.3  |
| 68 | 3-Oxooctanoic acid                               | [M+K] <sup>+</sup>  | C8H14O3     | 197.05745                        |                  |      |                  |      |                  |      | 1.5E+05          | 1.5  |
| 69 | 5-Acetylamino-6-amino-3-methyluracil             | [M+H] <sup>+</sup>  | C7H10N4O3   | 199.08257                        |                  |      |                  |      |                  |      | 1.0E+05          | 2.9  |
| 70 | Methyl cinnamate                                 | [M+K] <sup>+</sup>  | C10H10O2    | 201.03124                        |                  |      |                  |      |                  |      | 9.3E+04          | 1.8  |
| 71 | 1-Phenylpropyl acetate                           | [M+Na] <sup>+</sup> | C11H14O2    | 201.08860                        | 5.7E+05          | 2.4  | 5.7E+05          | -1.0 |                  |      |                  |      |
| 72 | 4-Aminophenyl ether                              | [M+H] <sup>+</sup>  | C12H12N2O   | 201.10224                        |                  |      | 1.4E+06          | -1.5 |                  |      |                  |      |
| 73 | (E)-4-Oxobut-1-ene-1,2,4-tricarboxylate          | [M+H] <sup>+</sup>  | C7H6O7      | 203.01863                        |                  |      | 7.8E+05          | 0.5  |                  |      |                  |      |
| 74 | Aldohexose                                       | [M+Na] <sup>+</sup> | C6H12O6     | 203.05261                        | 1.2E+07          | -0.2 | 2.8E+07          | 0.3  | 4.0E+06          | 0.0  | 1.4E+07          | 1.7  |
| 75 | Succimer                                         | [M+Na] <sup>+</sup> | C4H6O4S2    | 204.95997                        |                  |      |                  |      | 4.6E+06          | 1.3  |                  |      |
| 76 | Dimethylenetriurea                               | [M+H] <sup>+</sup>  | C5H12N6O3   | 205.10436                        |                  |      |                  |      | 1.1E+06          | 2.6  | 1.0E+05          | 1.6  |
| 77 | Caulophylline                                    | [M+H] <sup>+</sup>  | C12H16N2O   | 205.13354                        |                  |      |                  |      | 6.5E+06          | 2.6  |                  |      |
| 78 | N-Acetyl-D-phenylalanine                         | [M+H] <sup>+</sup>  | C11H13NO3   | 208.09682                        |                  |      | 4.0E+06          | 2.9  | 9.3E+05          | 2.0  |                  |      |

Table S1: Untargeted metabolic profiling of Goji Berries hydroalcoholic extracts by ESI(+) FT-R MS

| #   | Putative annotation <sup>a</sup>                | Ion                 | Formula (M) | m/z <sub>Theo</sub> <sup>b</sup> | BL1 <sup>c</sup> | ppm  | BL2 <sup>c</sup> | ppm  | SL1 <sup>c</sup> | ppm   | SL2 <sup>c</sup> | ppm  |
|-----|-------------------------------------------------|---------------------|-------------|----------------------------------|------------------|------|------------------|------|------------------|-------|------------------|------|
| 79  | (S)-dihydrolipoic acid                          | [M+H] <sup>+</sup>  | C8H16O2S2   | 209.06645                        |                  |      |                  |      | 1.0E+06          | -2.3  | 1.3E+05          | 1.3  |
| 80  | 8-Amino-7-oxononanoate                          | [M+Na] <sup>+</sup> | C9H17NO3    | 210.11006                        |                  |      | 5.2E+05          | 1.7  |                  |       | 4.3E+05          | 2.3  |
| 81  | 5,8,11-dodecatriynoic acid                      | [M+Na] <sup>+</sup> | C12H12O2    | 211.07295                        |                  |      |                  |      |                  |       | 3.7E+05          | 3.0  |
| 82  | 2E,8E-Undecadiene-4,6-diynoic acid              | [M+K] <sup>+</sup>  | C11H10O2    | 213.03124                        |                  |      | 6.3E+05          | -1.5 |                  |       |                  |      |
| 83  | 2-Hydroxy-6-ketononatrienedioate                | [M+H] <sup>+</sup>  | C9H8O6      | 213.03936                        |                  |      | 5.2E+05          | -1.9 |                  |       |                  |      |
| 84  | (+)-3-hydroxy pelargonic acid                   | [M+K] <sup>+</sup>  | C9H18O3     | 213.08875                        |                  |      |                  |      |                  |       | 1.3E+05          | -1.8 |
| 85  | N-Carboxyethyl-g-aminobutyric acid              | [M+K] <sup>+</sup>  | C7H13NO4    | 214.04762                        |                  |      | 1.8E+06          | 1.5  |                  |       |                  |      |
| 86  | Quinic acid                                     | [M+Na] <sup>+</sup> | C7H12O6     | 215.05261                        |                  |      |                  |      |                  |       | 7.1E+04          | -2.9 |
| 87  | 2E,4E,8Z,10E-dodecatetraenoic acid              | [M+Na] <sup>+</sup> | C12H16O2    | 215.10425                        |                  |      |                  |      | 9.5E+05          | 1.8   |                  |      |
| 88  | (+)-10-methyl lauric acid                       | [M+H] <sup>+</sup>  | C13H26O2    | 215.20056                        |                  |      |                  |      | 8.6E+05          | 1.7   |                  |      |
| 89  | Aldohexose                                      | [M+K] <sup>+</sup>  | C6H12O6     | 219.02655                        | 4.7E+07          | 0.0  | 6.6E+07          | 0.3  | 3.6E+07          | 0.1   | 8.5E+05          | 1.9  |
| 90  | 4-Nitrophenyl sulfate                           | [M+H] <sup>+</sup>  | C6H5NO6S    | 219.99103                        |                  |      |                  |      | 9.8E+05          | -2.0  |                  |      |
| 91  | Tauropine                                       | [M+Na] <sup>+</sup> | C5H11NO5S   | 220.02501                        | 4.4E+06          | 0.2  | 1.3E+07          | -2.3 | 9.6E+05          | 1.0   |                  |      |
| 92  | 1D-1-Guanidino-1-deoxy-3-dehydro-scylo-inositol | [M+H] <sup>+</sup>  | C7H13N3O5   | 220.09280                        |                  |      |                  |      | 2.0E+06          | -2.6  |                  |      |
| 93  | 2,4-Dinitrophenylhydrazine                      | [M+Na] <sup>+</sup> | C6H6N4O4    | 221.02813                        | 4.9E+06          | 1.0  | 1.4E+07          | -0.3 | 1.8E+06          | 0.2   | 9.9E+04          | 0.1  |
| 94  | Imidazole acetol-phosphate                      | [M+H] <sup>+</sup>  | C6H9N2O5P   | 221.03218                        |                  |      | 1.3E+06          | -2.5 | 1.5E+06          | -11.0 | 1.8E+05          | 2.5  |
| 95  | Diisopropyl phosphate                           | [M+K] <sup>+</sup>  | C6H15O4P    | 221.03396                        | 8.8E+05          | -0.1 |                  |      |                  |       |                  |      |
| 96  | 4-Amino-2-hydroxylamino-6-nitrotoluene          | [M+K] <sup>+</sup>  | C7H9N3O3    | 222.02755                        | 4.1E+05          | 1.8  | 3.8E+05          | 2.4  | 2.3E+06          | -0.5  |                  |      |
| 97  | 7-oxo-8-amino-nonanoic acid                     | [M+K] <sup>+</sup>  | C9H17NO3    | 226.08400                        |                  |      | 8.4E+05          | 2.7  |                  |       |                  |      |
| 98  | (E)-2-(Methoxycarbonylmethyl)butenedioate       | [M+K] <sup>+</sup>  | C7H8O6      | 226.99525                        |                  |      |                  |      | 9.5E+05          | -2.1  |                  |      |
| 99  | 5,8,11-dodecatriynoic acid                      | [M+K] <sup>+</sup>  | C12H12O2    | 227.04689                        |                  |      |                  |      | 8.0E+05          | -0.5  |                  |      |
| 100 | Nonate                                          | [M+K] <sup>+</sup>  | C9H16O4     | 227.06802                        |                  |      |                  |      |                  |       | 1.0E+05          | 2.0  |
| 101 | Myristoleic acid                                | [M+H] <sup>+</sup>  | C14H26O2    | 227.20056                        |                  |      |                  |      | 8.3E+05          | -0.5  |                  |      |
| 102 | 2-Methylcitric acid                             | [M+Na] <sup>+</sup> | C7H10O7     | 229.03187                        | 3.6E+05          | 0.8  | 7.6E+05          | -1.8 |                  |       | 8.1E+04          | 0.5  |
| 103 | 5'-Hydroxycotinine                              | [M+K] <sup>+</sup>  | C10H12N2O2  | 231.05304                        |                  |      |                  |      | 9.6E+05          | 1.8   |                  |      |
| 104 | cis-1,2-Diphenylcyclobutane                     | [M+Na] <sup>+</sup> | C16H16      | 231.11442                        | 9.9E+05          | 1.6  | 5.2E+05          | -2.6 |                  |       |                  |      |

Table S1: Untargeted metabolic profiling of Goji Berries hydroalcoholic extracts by ESI(+) FT-R MS

| #   | Putative annotation <sup>a</sup>                | Ion                 | Formula (M) | m/z <sub>Theo</sub> <sup>b</sup> | BL1 <sup>c</sup> | ppm  | BL2 <sup>c</sup> | ppm  | SL1 <sup>c</sup> | ppm  | SL2 <sup>c</sup> | ppm  |
|-----|-------------------------------------------------|---------------------|-------------|----------------------------------|------------------|------|------------------|------|------------------|------|------------------|------|
| 105 | 15-octadecene-9,11,13-triynoic acid             | [M+H] <sup>+</sup>  | C15H18O2    | 231.13796                        |                  |      |                  |      | 2.8E+06          | -2.2 |                  |      |
| 106 | 5-Hydroxyferulic acid                           | [M+Na] <sup>+</sup> | C10H10O5    | 233.04204                        |                  |      | 6.4E+05          | 2.6  |                  |      |                  |      |
| 107 | Sinapyl alcohol                                 | [M+Na] <sup>+</sup> | C11H14O4    | 233.07843                        | 2.4E+06          | 0.9  | 4.6E+06          | 1.1  |                  |      | 6.1E+04          | -2.1 |
| 108 | 3-(4'-Methylthio)butylmalic acid                | [M+H] <sup>+</sup>  | C9H16O5S    | 237.07912                        |                  |      |                  |      | 1.6E+06          | -1.0 | 3.0E+05          | -1.9 |
| 109 | 2E-Decenedioic acid                             | [M+K] <sup>+</sup>  | C10H16O4    | 239.06802                        |                  |      | 5.0E+05          | 1.7  |                  |      |                  |      |
| 110 | N-Phenyl-1-naphthylamine                        | [M+Na] <sup>+</sup> | C16H13N     | 242.09402                        |                  |      | 7.7E+05          | -1.2 |                  |      | 1.3E+05          | -2.9 |
| 111 | L-Tryptophan                                    | [M+K] <sup>+</sup>  | C11H12N2O2  | 243.05304                        |                  |      | 8.9E+05          | 1.4  |                  |      |                  |      |
| 112 | Oblongolide                                     | [M+Na] <sup>+</sup> | C14H20O2    | 243.13555                        |                  |      |                  |      |                  |      | 1.7E+05          | 0.6  |
| 113 | Diethylpropion                                  | [M+K] <sup>+</sup>  | C13H19NO    | 244.10982                        |                  |      |                  |      | 8.6E+05          | -0.3 |                  |      |
| 114 | 2-Methylcitric acid                             | [M+K] <sup>+</sup>  | C7H10O7     | 245.00581                        | 5.3E+05          | -0.7 | 1.7E+06          | -2.5 |                  |      |                  |      |
| 115 | Apiole                                          | [M+Na] <sup>+</sup> | C12H14O4    | 245.07843                        |                  |      |                  |      |                  |      | 5.7E+05          | 2.5  |
| 116 | Glycerophosphoglycerol                          | [M+H] <sup>+</sup>  | C6H15O8P    | 247.05773                        |                  |      |                  |      |                  |      | 1.5E+05          | -0.6 |
| 117 | Chorismate                                      | [M+Na] <sup>+</sup> | C10H10O6    | 249.03696                        | 4.2E+05          | 0.4  | 4.9E+05          | -0.5 |                  |      |                  |      |
| 118 | N-Caffeoylputrescine                            | [M+H] <sup>+</sup>  | C13H18N2O3  | 251.13902                        |                  |      |                  |      |                  |      | 2.7E+05          | -2.1 |
| 119 | Morindaparvin A                                 | [M+H] <sup>+</sup>  | C15H8O4     | 253.04954                        | 1.1E+06          | -2.8 | 4.4E+05          | -2.3 |                  |      |                  |      |
| 120 | Kinetin                                         | [M+K] <sup>+</sup>  | C10H9N5O    | 254.04387                        | 5.3E+05          | -0.8 | 7.2E+05          | 1.2  | 1.5E+06          | 1.5  |                  |      |
| 121 | Tetrahydroharmine                               | [M+K] <sup>+</sup>  | C13H16N2O   | 255.08942                        |                  |      | 7.1E+05          | -2.6 |                  |      |                  |      |
| 122 | 3-Hydroxydodecanoic acid                        | [M+K] <sup>+</sup>  | C12H24O3    | 255.13570                        |                  |      | 6.7E+05          | -2.9 |                  |      |                  |      |
| 123 | (S)-beta-Methylindolepyruvate                   | [M+K] <sup>+</sup>  | C12H11NO3   | 256.03705                        |                  |      | 1.5E+06          | -0.2 |                  |      |                  |      |
| 124 | O-Succinyl-L-homoserine                         | [M+K] <sup>+</sup>  | C8H13NO6    | 258.03745                        |                  |      |                  |      | 1.5E+06          | -1.9 |                  |      |
| 125 | Ngamma-Nitro-L-arginine                         | [M+K] <sup>+</sup>  | C6H13N5O4   | 258.05991                        |                  |      |                  |      | 1.7E+06          | 2.9  |                  |      |
| 126 | Darlingine                                      | [M+K] <sup>+</sup>  | C13H17NO2   | 258.08909                        |                  |      |                  |      | 1.8E+06          | -0.8 |                  |      |
| 127 | N-Lauroylglycine                                | [M+H] <sup>+</sup>  | C14H27NO3   | 258.20637                        |                  |      |                  |      | 1.5E+06          | -1.3 |                  |      |
| 128 | Apiole                                          | [M+K] <sup>+</sup>  | C12H14O4    | 261.05237                        |                  |      |                  |      |                  |      | 3.8E+05          | 1.4  |
| 129 | 3-Deoxy-D-manno-octulosonate                    | [M+Na] <sup>+</sup> | C8H14O8     | 261.05809                        | 7.8E+05          | 0.2  | 1.3E+06          | 0.4  |                  |      | 2.9E+05          | 1.1  |
| 130 | 3-Methoxy-4-hydroxyphenylethyleneglycol sulfate | [M+H] <sup>+</sup>  | C9H12O7S    | 265.03765                        |                  |      |                  |      | 1.0E+06          | -0.9 | 3.0E+05          | 1.9  |

Table S1: Untargeted metabolic profiling of Goji Berries hydroalcoholic extracts by ESI(+) FT-R MS

| #   | Putative annotation <sup>a</sup>                                    | Ion                 | Formula (M) | m/z <sub>Theo</sub> <sup>b</sup> | BL1 <sup>c</sup> | ppm  | BL2 <sup>c</sup> | ppm  | SL1 <sup>c</sup> | ppm  | SL2 <sup>c</sup> | ppm  |
|-----|---------------------------------------------------------------------|---------------------|-------------|----------------------------------|------------------|------|------------------|------|------------------|------|------------------|------|
| 131 | Subaphyllin                                                         | [M+H] <sup>+</sup>  | C14H20N2O3  | 265.15467                        |                  |      | 5.0E+05          | 2.2  |                  |      | 1.6E+05          | -2.4 |
| 132 | (+)-12-methyl myristic acid                                         | [M+Na] <sup>+</sup> | C15H30O2    | 265.21380                        |                  |      |                  |      |                  |      | 8.1E+04          | -2.8 |
| 133 | 10-Hydroxybenzo[a]pyrene                                            | [M+H] <sup>+</sup>  | C20H12O     | 269.09609                        |                  |      | 9.0E+05          | 0.6  |                  |      | 1.3E+05          | -1.3 |
| 134 | 5,6-Dehydrolupanine                                                 | [M+Na] <sup>+</sup> | C15H22N2O   | 269.16243                        |                  |      | 9.1E+05          | 2.3  |                  |      |                  |      |
| 135 | N-Caffeoylputrescine                                                | [M+Na] <sup>+</sup> | C13H18N2O3  | 273.12096                        | 7.0E+05          | -1.9 | 4.8E+05          | -1.3 |                  |      |                  |      |
| 136 | N-Acetylgalactosamine                                               | [M+K] <sup>+</sup>  | C8H13NO7    | 274.03236                        |                  |      |                  |      | 1.2E+06          | 1.8  |                  |      |
| 137 | Brugine                                                             | [M+H] <sup>+</sup>  | C12H19NO2S2 | 274.09300                        |                  |      |                  |      | 9.1E+05          | -2.7 |                  |      |
| 138 | L-Thyronine                                                         | [M+H] <sup>+</sup>  | C15H15NO4   | 274.10738                        |                  |      |                  |      | 1.4E+06          | 0.0  |                  |      |
| 139 | Glutaconylcarnitine                                                 | [M+H] <sup>+</sup>  | C12H19NO6   | 274.12851                        |                  |      |                  |      | 6.4E+05          | 0.4  |                  |      |
| 140 | Hexadecaphinganine                                                  | [M+H] <sup>+</sup>  | C16H35NO2   | 274.27406                        | 1.4E+06          | 2.5  | 1.4E+06          | 0.2  |                  |      |                  |      |
| 141 | 6-Phosphogluconic acid                                              | [M+H] <sup>+</sup>  | C6H13O10P   | 277.03191                        | 2.4E+06          | 0.0  | 2.4E+06          | 0.0  | 6.3E+05          | -0.3 |                  |      |
| 142 | Xanthopterin-B2                                                     | [M+K] <sup>+</sup>  | C9H10N4O4   | 277.03336                        | 2.4E+06          | -2.4 |                  |      | 8.5E+05          | -2.2 |                  |      |
| 143 | methyl 4-[2-(2-formyl-vinyl)-3-hydroxy-5-oxo-cyclopentyl]-butanoate | [M+Na] <sup>+</sup> | C13H18O5    | 277.10464                        | 2.7E+06          | 0.2  | 4.1E+06          | 0.6  |                  |      | 2.9E+05          | -1.6 |
| 144 | Albendazole-2-aminosulfone                                          | [M+K] <sup>+</sup>  | C10H13N3O2S | 278.03601                        | 3.8E+05          | -0.6 | 5.9E+05          | 1.1  |                  |      |                  |      |
| 145 | 2-Ethylhexyl phthalate                                              | [M+H] <sup>+</sup>  | C16H22O4    | 279.15909                        | 4.6E+05          | 1.3  | 4.6E+05          | -0.8 |                  |      | 1.6E+06          | -2.1 |
| 146 | (+)-12-methyl myristic acid                                         | [M+K] <sup>+</sup>  | C15H30O2    | 281.18774                        |                  |      |                  |      |                  |      | 2.5E+05          | -1.9 |
| 147 | Arborinine                                                          | [M+H] <sup>+</sup>  | C16H15NO4   | 286.10738                        | 3.5E+05          | 1.9  | 3.5E+05          | -0.2 |                  |      | 9.0E+04          | -2.0 |
| 148 | Nupharidine                                                         | [M+K] <sup>+</sup>  | C15H23NO2   | 288.13604                        |                  |      | 1.1E+06          | 1.0  |                  |      |                  |      |
| 149 | Micropine                                                           | [M+Na] <sup>+</sup> | C16H27NO2   | 288.19340                        |                  |      |                  |      | 1.2E+06          | -2.7 |                  |      |
| 150 | 2(α-D-Mannosyl)-D-glycerate                                         | [M+Na] <sup>+</sup> | C9H16O9     | 291.06865                        |                  |      |                  |      | 6.3E+05          | -2.4 | 2.3E+05          | -1.5 |
| 151 | 2-p-Tolyl-5,6,7,8-tetrahydrobenzo[d]imidazo[2,1-b]thiazole          | [M+Na] <sup>+</sup> | C16H16N2S   | 291.09264                        |                  |      |                  |      | 1.1E+06          | 2.1  |                  |      |
| 152 | Palmitoleic acid                                                    | [M+K] <sup>+</sup>  | C16H30O2    | 293.18774                        | 9.4E+05          | -2.2 | 8.5E+05          | 0.8  |                  |      |                  |      |
| 153 | 14-Methyl-8Z-hexadecen-1-ol                                         | [M+K] <sup>+</sup>  | C17H34O     | 293.22413                        |                  |      | 1.9E+06          | 1.5  |                  |      | 2.5E+05          | -1.0 |
| 154 | Sugeonyl acetate                                                    | [M+Na] <sup>+</sup> | C17H24O3    | 299.16177                        |                  |      | 4.1E+05          | 0.5  |                  |      |                  |      |
| 155 | Stearidonic acid                                                    | [M+Na] <sup>+</sup> | C18H28O2    | 299.19815                        |                  |      | 4.5E+05          | 2.0  |                  |      |                  |      |
| 156 | Aspartyllysine                                                      | [M+K] <sup>+</sup>  | C10H19N3O5  | 300.09563                        |                  |      |                  |      | 6.1E+05          | -1.6 |                  |      |



Table S1: Untargeted metabolic profiling of Goji Berries hydroalcoholic extracts by ESI(+) FT-R MS

| #   | Putative annotation <sup>a</sup>                         | Ion                 | Formula (M) | m/z <sub>Theo</sub> <sup>b</sup> | BL1 <sup>c</sup> | ppm  | BL2 <sup>c</sup> | ppm  | SL1 <sup>c</sup> | ppm  | SL2 <sup>c</sup> | ppm  |
|-----|----------------------------------------------------------|---------------------|-------------|----------------------------------|------------------|------|------------------|------|------------------|------|------------------|------|
| 157 | Dibutyl phthalate                                        | [M+Na] <sup>+</sup> | C16H22O4    | 301.14103                        | 5.4E+05          | -0.5 | 1.0E+06          | 1.0  |                  |      |                  |      |
| 158 | Panaxotriol                                              | [M+Na] <sup>+</sup> | C17H26O3    | 301.17742                        |                  |      |                  |      | 7.2E+05          | 1.3  |                  |      |
| 159 | Tributyl phosphate                                       | [M+K] <sup>+</sup>  | C12H27O4P   | 305.12786                        |                  |      | 5.3E+05          | -1.1 |                  |      |                  |      |
| 160 | Stearic acid                                             | [M+Na] <sup>+</sup> | C18H36O2    | 307.26075                        |                  |      |                  |      |                  |      | 3.8E+05          | 2.8  |
| 161 | Hexadecanedioic acid                                     | [M+Na] <sup>+</sup> | C16H30O4    | 309.20363                        | 6.2E+05          | -1.0 | 6.2E+05          | -2.7 |                  |      |                  |      |
| 162 | (+)-14-methyl palmitic acid                              | [M+K] <sup>+</sup>  | C17H34O2    | 309.21904                        |                  |      | 1.9E+06          | -1.7 |                  |      | 2.2E+05          | 77.0 |
| 163 | Orotidine                                                | [M+Na] <sup>+</sup> | C10H12N2O8  | 311.04859                        |                  |      |                  |      | 5.4E+05          | 0.6  |                  |      |
| 164 | Sempervirine                                             | [M+K] <sup>+</sup>  | C19H16N2    | 311.09451                        |                  |      |                  |      | 5.5E+05          | 0.1  | 1.2E+05          | 2.3  |
| 165 | 4-(3-Methylbut-2-enyl)-L-tryptophan                      | [M+K] <sup>+</sup>  | C16H20N2O2  | 311.11564                        |                  |      |                  |      | 5.6E+05          | -2.9 |                  |      |
| 166 | Dibutyl phthalate                                        | [M+K] <sup>+</sup>  | C16H22O4    | 317.11497                        | 1.3E+06          | -1.0 | 1.6E+06          | -0.3 |                  |      | 3.5E+05          | -2.4 |
| 167 | N6,N6-Dimethyladenosine                                  | [M+Na] <sup>+</sup> | C12H17N5O4  | 318.11727                        | 5.8E+05          | 1.0  | 7.6E+05          | -2.7 |                  |      |                  |      |
| 168 | N-methyl arachidonoyl amine                              | [M+H] <sup>+</sup>  | C21H35NO    | 318.27914                        |                  |      |                  |      | 1.5E+06          | 0.0  |                  |      |
| 169 | Trimethylolpropane triacrylate                           | [M+Na] <sup>+</sup> | C15H20O6    | 319.11521                        | 4.5E+05          | -1.4 |                  |      |                  |      |                  |      |
| 170 | Phenethylamine glucuronide                               | [M+Na] <sup>+</sup> | C14H19NO6   | 320.11046                        |                  |      | 8.7E+05          | 0.8  |                  |      |                  |      |
| 171 | 1-Carbazol-9-yl-3-(3,5-dimethylpyrazol-1-yl)-propan-2-ol | [M+H] <sup>+</sup>  | C20H21N3O   | 320.17574                        |                  |      | 1.0E+07          | -1.8 |                  |      |                  |      |
| 172 | 3,7-Dimethoxyflavone                                     | [M+K] <sup>+</sup>  | C17H14O4    | 321.05237                        |                  |      |                  |      | 6.2E+05          | 2.4  |                  |      |
| 173 | Arctolide                                                | [M+H] <sup>+</sup>  | C17H20O6    | 321.13326                        | 1.1E+06          | 1.0  | 9.2E+05          | -0.4 |                  |      |                  |      |
| 174 | Octanoylglucuronide                                      | [M+H] <sup>+</sup>  | C14H24O8    | 321.15439                        | 5.2E+05          | 1.1  | 5.2E+05          | -0.3 | 5.1E+05          | 0.3  |                  |      |
| 175 | 10-hydroxy-16-oxo-hexadecanoic acid                      | [M+K] <sup>+</sup>  | C16H30O4    | 325.17757                        | 1.1E+06          | 1.3  | 1.1E+06          | -0.1 |                  |      |                  |      |
| 176 | 14-Dihydroxycornestine                                   | [M+Na] <sup>+</sup> | C16H20O6    | 331.11521                        |                  |      |                  |      | 1.5E+06          | -0.7 |                  |      |
| 177 | Phytuberin                                               | [M+K] <sup>+</sup>  | C17H26O4    | 333.14627                        |                  |      |                  |      |                  |      | 1.4E+05          | 1.4  |
| 178 | Steroid O-sulfate                                        | [M+H] <sup>+</sup>  | C18H24O4S   | 337.14681                        | 5.3E+05          | -2.3 | 4.0E+05          | -1.0 |                  |      |                  |      |
| 179 | (9Z)-(7S,8S)-Dihydroxyoctadecenoic acid                  | [M+Na] <sup>+</sup> | C18H34O4    | 337.23493                        | 1.3E+06          | 0.0  |                  |      |                  |      | 5.5E+05          | 0.3  |
| 180 | 5,2',6'-Trihydroxy-7-methoxyflavone                      | [M+K] <sup>+</sup>  | C16H12O6    | 339.02655                        |                  |      |                  |      | 5.2E+05          | 2.7  | 1.1E+05          | 1.2  |
| 181 | 1-(5-Phospho-D-ribose)-5-amino-4-imidazolecarboxylate    | [M+H] <sup>+</sup>  | C9H14N3O9P  | 340.05404                        |                  |      |                  |      | 5.7E+05          | -1.2 |                  |      |
| 182 | Coptisine                                                | [M+Na] <sup>+</sup> | C19H14NO4   | 343.08150                        |                  |      |                  |      | 2.8E+06          | 2.2  |                  |      |



Table S1: Untargeted metabolic profiling of Goji Berries hydroalcoholic extracts by ESI(+) FT-R MS

| #   | Putative annotation <sup>a</sup>                                             | Ion                 | Formula (M) | m/z <sub>Theo</sub> <sup>b</sup> | BL1 <sup>c</sup> | ppm  | BL2 <sup>c</sup> | ppm  | SL1 <sup>c</sup> | ppm  | SL2 <sup>c</sup> | ppm  |
|-----|------------------------------------------------------------------------------|---------------------|-------------|----------------------------------|------------------|------|------------------|------|------------------|------|------------------|------|
| 209 | 19(R)-hydroxy-PGE1                                                           | [M+H] <sup>+</sup>  | C20H34O6    | 371.24282                        |                  |      | 8.9E+05          | -0.6 | 2.1E+06          | -1.8 |                  |      |
| 210 | 19-norcholestanol                                                            | [M+H] <sup>+</sup>  | C26H46O     | 375.36214                        |                  |      | 1.3E+06          | 0.8  |                  |      |                  |      |
| 211 | 1-O-Feruloyl-beta-D-glucose                                                  | [M+Na] <sup>+</sup> | C16H20O9    | 379.09995                        |                  |      |                  |      |                  |      | 1.9E+05          | -2.6 |
| 212 | D-Maltose                                                                    | [M+K] <sup>+</sup>  | C12H22O11   | 381.07937                        | 1.0E+06          | 0.2  | 1.4E+06          | -1.2 | 1.4E+06          | -0.9 |                  |      |
| 213 | N1-(5-Phospho-a-D-ribose)-5,6-dimethylbenzimidazole                          | [M+Na] <sup>+</sup> | C14H19N2O7P | 381.08221                        |                  |      |                  |      | 1.3E+06          | -1.2 |                  |      |
| 214 | 12a-Hydroxypachyrrhizone                                                     | [M+H] <sup>+</sup>  | C20H14O8    | 383.07614                        |                  |      |                  |      |                  |      | 4.6E+05          | -2.8 |
| 215 | Aknadicine                                                                   | [M+K] <sup>+</sup>  | C19H23NO5   | 384.12078                        | 6.0E+06          | -2.2 | 1.2E+07          | -1.0 |                  |      |                  |      |
| 216 | (+)-Eudesmin                                                                 | [M+H] <sup>+</sup>  | C22H26O6    | 387.18022                        |                  |      |                  |      | 1.6E+06          | 2.0  | 2.3E+05          | -2.0 |
| 217 | (22E)-3alpha,12alpha-Dihydroxy-5beta-chole-22-en-24-oic Acid                 | [M+H] <sup>+</sup>  | C24H38O4    | 391.28429                        |                  |      | 4.7E+05          | -0.7 |                  |      |                  |      |
| 218 | Isopropamide                                                                 | [M+K] <sup>+</sup>  | C23H33N2O   | 392.22245                        |                  |      |                  |      | 4.5E+05          | -1.8 |                  |      |
| 219 | 5,7,3',4',5'-Pentahydroxy-3,6,8-trimethoxyflavone                            | [M+H] <sup>+</sup>  | C18H16O10   | 393.08162                        | 7.3E+05          | -0.7 |                  |      |                  |      | 6.3E+05          | 2.3  |
| 220 | Leukotriene B4 ethanolamide                                                  | [M+Na] <sup>+</sup> | C22H37NO4   | 402.26148                        |                  |      |                  |      | 6.2E+05          | -1.7 |                  |      |
| 221 | 5S-HETE di-endoperoxide                                                      | [M+H] <sup>+</sup>  | C20H34O8    | 403.23264                        |                  |      |                  |      |                  |      | 2.6E+05          | 2.9  |
| 222 | 5-Methoxy-7-prenyloxy-8-C-prenylflavanone                                    | [M+H] <sup>+</sup>  | C26H30O4    | 407.22169                        |                  |      | 1.8E+06          | -2.1 |                  |      |                  |      |
| 223 | Glucotropaeolin                                                              | [M+H] <sup>+</sup>  | C14H19NO9S2 | 410.05740                        |                  |      | 5.7E+05          | -1.1 |                  |      | 1.8E+05          | -1.9 |
| 224 | Di-n-octyl phthalate                                                         | [M+Na] <sup>+</sup> | C24H38O4    | 413.26623                        | 1.3E+06          | -2.7 | 6.8E+05          | -2.3 |                  |      | 1.6E+06          | -1.9 |
| 225 | Glucoerucin                                                                  | [M+H] <sup>+</sup>  | C12H23NO9S3 | 422.06077                        | 6.6E+05          | -2.1 |                  |      |                  |      |                  |      |
| 226 | 5,7,3',4'-Tetrahydroxy-6,8-diprenylisoflavone                                | [M+H] <sup>+</sup>  | C25H26O6    | 423.18022                        |                  |      |                  |      | 1.9E+06          | -1.5 | 4.5E+05          | -2.5 |
| 227 | (-)-epigallocatechin sulfate                                                 | [M+K] <sup>+</sup>  | C15H13O10S  | 423.98610                        | 1.3E+06          | -1.6 | 1.3E+06          | -1.4 |                  |      |                  |      |
| 228 | N-Methyl-2,3,7,8-tetramethoxy-5,6-dihydrobenzophenanthridine-6-ethanoic acid | [M+H] <sup>+</sup>  | C24H25NO6   | 424.17546                        |                  |      |                  |      | 1.5E+07          | -2.9 |                  |      |
| 229 | Antiarone K                                                                  | [M+Na] <sup>+</sup> | C22H26O7    | 425.15707                        |                  |      |                  |      |                  |      | 1.9E+05          | 1.1  |
| 230 | Aspidoalbine                                                                 | [M+H] <sup>+</sup>  | C24H32N2O5  | 429.23840                        | 5.1E+05          | 0.1  | 5.1E+05          | 0.3  |                  |      | 6.8E+05          | 1.5  |
| 231 | 25-dihydroxy-19-nor-22-oxavitamin D3                                         | [M+Na] <sup>+</sup> | C25H42O4    | 429.29753                        |                  |      |                  |      | 7.1E+05          | 2.3  |                  |      |
| 232 | 5,7,8-Trihydroxyflavone 5-glucoside                                          | [M+H] <sup>+</sup>  | C21H20O10   | 433.11292                        | 4.6E+05          | -0.7 |                  |      |                  |      |                  |      |
| 233 | Echimidine                                                                   | [M+K] <sup>+</sup>  | C20H31NO7   | 436.17321                        | 6.2E+05          | 2.1  |                  |      |                  |      |                  |      |
| 234 | Cryogenine                                                                   | [M+H] <sup>+</sup>  | C26H29NO5   | 436.21185                        | 6.4E+05          | 2.7  |                  |      |                  |      |                  |      |

Table S1: Untargeted metabolic profiling of Goji Berries hydroalcoholic extracts by ESI(+) FT-R MS

| #   | Putative annotation <sup>a</sup>              | Ion                 | Formula (M) | m/z <sub>Theo</sub> <sup>b</sup> | BL1 <sup>c</sup> | ppm  | BL2 <sup>c</sup> | ppm  | SL1 <sup>c</sup> | ppm  | SL2 <sup>c</sup> | ppm  |
|-----|-----------------------------------------------|---------------------|-------------|----------------------------------|------------------|------|------------------|------|------------------|------|------------------|------|
| 235 | Ancistrobrevine A                             | [M+H] <sup>+</sup>  | C27H33NO4   | 436.24824                        | 8.1E+05          | -2.9 |                  |      |                  |      |                  |      |
| 236 | Solanidine                                    | [M+K] <sup>+</sup>  | C27H43NO    | 436.29762                        | 4.5E+05          | -2.4 |                  |      |                  |      |                  |      |
| 237 | Hallactone B                                  | [M+H] <sup>+</sup>  | C20H24O9S   | 441.12138                        | 5.0E+05          | -2.2 | 8.1E+05          | -1.8 |                  |      |                  |      |
| 238 | 2'',3''-Dihydroxylupinifolin                  | [M+H] <sup>+</sup>  | C25H28O7    | 441.19078                        |                  |      |                  |      |                  |      |                  |      |
| 239 | Lusitanicoside                                | [M+H] <sup>+</sup>  | C21H30O10   | 443.19117                        |                  |      |                  |      |                  |      | 4.8E+05          | 2.8  |
| 240 | 24,25-trihydroxy-22-oxavitamin D3             | [M+Na] <sup>+</sup> | C26H42O5    | 457.29245                        |                  |      | 3.9E+05          | 2.5  |                  |      |                  |      |
| 241 | 5-Hydroxypseudobaptigenin 7-O-glucoside       | [M+H] <sup>+</sup>  | C22H20O11   | 461.10784                        |                  |      |                  |      | 5.4E+05          | 3.0  |                  |      |
| 242 | 3-Hydroxy-11Z-octadecenoylcarnitine           | [M+Na] <sup>+</sup> | C25H47NO5   | 464.33464                        |                  |      |                  |      | 4.5E+05          | 0.3  |                  |      |
| 243 | 12-Dehydrotetracycline                        | [M+Na] <sup>+</sup> | C22H22N2O8  | 465.12684                        |                  |      |                  |      |                  |      | 3.4E+05          | -2.6 |
| 244 | Obliquine                                     | [M+Na] <sup>+</sup> | C26H28N2O5  | 471.18904                        |                  |      |                  |      | 4.8E+05          | 0.8  |                  |      |
| 245 | N-arachidonoyl glutamic acid                  | [M+K] <sup>+</sup>  | C25H39NO5   | 472.24598                        | 1.3E+06          | -1.0 | 3.6E+06          | -0.3 |                  |      | 8.1E+05          | -0.2 |
| 246 | 25-dihydroxy-3-deoxy-3-thiavitamin D3 3-oxide | [M+K] <sup>+</sup>  | C26H42O3S   | 473.24863                        | 4.6E+05          | -0.2 | 1.0E+06          | 2.1  |                  |      | 3.1E+05          | -1.4 |
| 247 | 1'',2''-Dihydro-2'-hydroxycycloosajin         | [M+K] <sup>+</sup>  | C26H28O6    | 475.15175                        |                  |      |                  |      | 1.3E+06          | -0.3 |                  |      |
| 248 | DHAP(18:0)                                    | [M+K] <sup>+</sup>  | C21H41O7P   | 475.22215                        |                  |      |                  |      | 1.4E+06          | -2.1 |                  |      |
| 249 | LPA(0:0/18:0)                                 | [M+K] <sup>+</sup>  | C21H43O7P   | 477.23780                        |                  |      |                  |      | 4.7E+05          | -1.7 |                  |      |
| 250 | 1-O-all-trans-retinoyl-beta-glucuronic acid   | [M+H] <sup>+</sup>  | C26H36O8    | 477.24829                        |                  |      |                  |      | 4.6E+05          | 0.2  |                  |      |
| 251 | 27-Norcholestanehexol                         | [M+Na] <sup>+</sup> | C26H46O6    | 477.31866                        | 4.6E+05          | 0.6  | 4.6E+05          | 1.6  |                  |      |                  |      |
| 252 | Monocyclic botryococcane                      | [M+H] <sup>+</sup>  | C34H68      | 477.53938                        |                  |      |                  |      | 1.1E+06          | -2.3 |                  |      |
| 253 | PG(16:1(9Z)/0:0)                              | [M+H] <sup>+</sup>  | C22H43O9P   | 483.27175                        |                  |      |                  |      |                  |      | 3.7E+05          | -0.2 |
| 254 | Dihydroxy-24-oxo-23-azavitamin D2             | [M+K] <sup>+</sup>  | C27H43NO4   | 484.28237                        |                  |      |                  |      | 7.9E+05          | 0.8  |                  |      |
| 255 | LysoSM(d18:1)                                 | [M+Na] <sup>+</sup> | C23H50N2O5P | 488.33496                        |                  |      |                  |      | 4.3E+06          | 0.0  |                  |      |
| 256 | Leucettamol A                                 | [M+Na] <sup>+</sup> | C30H52N2O2  | 495.39210                        |                  |      |                  |      | 1.6E+06          | -3.0 |                  |      |
| 257 | Trihydroxy-5alpha-cholestan-24-yl sulfate     | [M+Na] <sup>+</sup> | C24H42O7S   | 497.25435                        |                  |      |                  |      | 4.1E+05          | -0.9 | 2.5E+05          | 1.6  |
| 258 | N-Acetyl-O-demethylpuromycin                  | [M+H] <sup>+</sup>  | C23H29N7O6  | 500.22521                        |                  |      |                  |      | 7.0E+05          | -0.1 |                  |      |
| 259 | (-)-Jolkinol A                                | [M+Na] <sup>+</sup> | C29H36O6    | 503.24041                        |                  |      |                  |      | 5.6E+05          | -2.7 |                  |      |
| 260 | 3-Sulfodeoxycholic acid                       | [M+K] <sup>+</sup>  | C24H40O7S   | 511.21263                        | 3.6E+05          | 2.5  | 8.5E+05          | -1.9 |                  |      |                  |      |

Table S1: Untargeted metabolic profiling of Goji Berries hydroalcoholic extracts by ESI(+) FT-R MS

| #   | Putative annotation <sup>a</sup>                   | Ion                 | Formula (M)   | m/z <sub>Theo</sub> <sup>b</sup> | BL1 <sup>c</sup> | ppm  | BL2 <sup>c</sup> | ppm  | SL1 <sup>c</sup> | ppm  | SL2 <sup>c</sup> | ppm  |
|-----|----------------------------------------------------|---------------------|---------------|----------------------------------|------------------|------|------------------|------|------------------|------|------------------|------|
| 261 | Epimedeside C                                      | [M+H] <sup>+</sup>  | C26H28O11     | 517.17044                        |                  |      |                  |      | 4.1E+05          | 2.4  | 3.3E+05          | 2.9  |
| 262 | Ophrysananin                                       | [M+H] <sup>+</sup>  | C23H21O14     | 522.10041                        |                  |      |                  |      | 1.7E+06          | 1.2  |                  |      |
| 263 | Trisaccharide                                      | [M+Na] <sup>+</sup> | C18H32O16     | 527.15826                        | 5.8E+05          | -0.1 | 6.3E+05          | 1.3  | 5.9E+05          | -2.4 |                  |      |
| 264 | Artelastocarpin                                    | [M+Na] <sup>+</sup> | C30H34O7      | 529.21967                        |                  |      |                  |      | 1.2E+06          | 0.9  | 1.7E+05          | -0.9 |
| 265 | Aragusteroketal                                    | [M+K] <sup>+</sup>  | C31H54O4      | 529.36537                        |                  |      |                  |      | 1.1E+06          | -0.5 |                  |      |
| 266 | 32,35-anhydrobacteriohopaneterol                   | [M+H] <sup>+</sup>  | C35H60O3      | 529.46152                        |                  |      |                  |      | 1.4E+06          | 0.1  |                  |      |
| 267 | Cassiamin C                                        | [M+K] <sup>+</sup>  | C30H18O8      | 545.06333                        |                  |      | 6.1E+05          | 2.3  |                  |      |                  |      |
| 268 | dTDP-3-methyl-4-oxo-2,6-dideoxy-L-glucose          | [M+H] <sup>+</sup>  | C17H26N2O14P2 | 545.09320                        |                  |      | 5.9E+05          | 0.5  |                  |      |                  |      |
| 269 | 5,8-Dihydroxy-6,7,4'-trimethoxyflavone 8-glucoside | [M+K] <sup>+</sup>  | C24H26O12     | 545.10559                        | 4.7E+05          | -1.3 |                  |      |                  |      |                  |      |
| 270 | Estriol 3-sulfate 16-glucuronide                   | [M+H] <sup>+</sup>  | C24H32O12S    | 545.16872                        | 5.6E+05          | 2.0  | 7.4E+05          | -0.3 |                  |      |                  |      |
| 271 | PG(18:3(6Z,9Z,12Z)/0:0)                            | [M+K] <sup>+</sup>  | C24H43O9P     | 545.22763                        |                  |      |                  |      | 4.6E+05          | 1.1  |                  |      |
| 272 | Trilobolide                                        | [M+Na] <sup>+</sup> | C27H38O10     | 545.23572                        | 4.6E+05          | -0.8 |                  |      |                  |      |                  |      |
| 273 | PI(P-16:0/0:0)                                     | [M+H] <sup>+</sup>  | C25H49O11P    | 557.30853                        |                  |      |                  |      | 7.1E+05          | 1.1  |                  |      |
| 274 | Petunidin 3-(6''-acetylglucoside)                  | [M+K] <sup>+</sup>  | C24H25O13     | 560.09268                        |                  |      |                  |      | 5.7E+05          | -2.9 |                  |      |
| 275 | Eriocarpin                                         | [M+H] <sup>+</sup>  | C29H38O11     | 563.24869                        |                  |      |                  |      | 5.2E+05          | 0.2  | 1.6E+05          | -2.2 |
| 276 | 2-deoxy-20-hydroxyecdysone 22-phosphate            | [M+Na] <sup>+</sup> | C27H45O9P     | 567.26934                        |                  |      |                  |      | 4.6E+05          | -0.9 |                  |      |
| 277 | PG(20:5(5Z,8Z,11Z,14Z,17Z)/0:0)                    | [M+K] <sup>+</sup>  | C26H43O9P     | 569.22763                        |                  |      |                  |      | 4.3E+05          | -1.6 | 3.5E+05          | -0.5 |
| 278 | (-)-Santiaguine                                    | [M+H] <sup>+</sup>  | C38H48N4O2    | 593.38500                        |                  |      |                  |      | 1.2E+06          | -0.5 |                  |      |
| 279 | 14:0 Cholesteryl ester                             | [M+H] <sup>+</sup>  | C41H72O2      | 597.56051                        |                  |      |                  |      | 1.8E+06          | -0.4 |                  |      |
| 280 | Quercetin 3-(2''-galloyl-α-L-arabinopyranoside)    | [M+K] <sup>+</sup>  | C27H22O15     | 625.05903                        |                  |      |                  |      | 3.8E+05          | -2.4 | 1.3E+05          | 0.6  |
| 281 | Malvidin 3-O-beta-D-sambubioside                   | [M+H] <sup>+</sup>  | C28H33O16     | 626.18414                        | 4.1E+05          | 1.7  | 3.9E+05          | 2.5  |                  |      |                  |      |
| 282 | 7''-O-Phosphohygroscopicin                         | [M+Na] <sup>+</sup> | C20H38N3O16P  | 630.18819                        |                  |      |                  |      | 1.7E+06          | 1.4  |                  |      |
| 283 | Peridinin                                          | [M+H] <sup>+</sup>  | C39H50O7      | 631.36293                        |                  |      |                  |      | 7.8E+05          | 1.7  |                  |      |
| 284 | PA(12:0/20:4(5Z,8Z,11Z,14Z))                       | [M+H] <sup>+</sup>  | C35H61O8P     | 641.41768                        |                  |      |                  |      | 3.9E+05          | -0.5 |                  |      |
| 285 | PA(12:0/17:1(9Z))                                  | [M+K] <sup>+</sup>  | C32H61O8P     | 643.37356                        |                  |      |                  |      | 4.4E+05          | -2.6 |                  |      |
| 286 | PA(12:0/20:3(8Z,11Z,14Z))                          | [M+H] <sup>+</sup>  | C35H63O8P     | 643.43333                        |                  |      |                  |      | 5.4E+05          | 2.6  |                  |      |

Table S1: Untargeted metabolic profiling of Goji Berries hydroalcoholic extracts by ESI(+) FT-R MS

| #   | Putative annotation <sup>a</sup>                                            | Ion                 | Formula (M)   | m/z <sub>Theo</sub> <sup>b</sup> | BL1 <sup>c</sup> | ppm  | BL2 <sup>c</sup> | ppm | SL1 <sup>c</sup> | ppm  | SL2 <sup>c</sup> | ppm  |
|-----|-----------------------------------------------------------------------------|---------------------|---------------|----------------------------------|------------------|------|------------------|-----|------------------|------|------------------|------|
| 287 | GDP-L-galactose                                                             | [M+K] <sup>+</sup>  | C16H25N5O16P2 | 644.04031                        |                  |      |                  |     | 4.0E+05          | -1.0 |                  |      |
| 288 | Juliflorine                                                                 | [M+Na] <sup>+</sup> | C40H75N3O2    | 652.57515                        |                  |      |                  |     | 3.8E+05          | 2.0  |                  |      |
| 289 | 2-(S-Glutathionyl)acetyl glutathione                                        | [M+K] <sup>+</sup>  | C22H34N6O13S2 | 693.12569                        |                  |      |                  |     | 4.7E+05          | 0.0  |                  |      |
| 290 | DG(18:1(11Z)/24:1(15Z)/0:0)                                                 | [M+H] <sup>+</sup>  | C45H84O5      | 705.63915                        | 1.1E+06          | 2.8  |                  |     |                  |      |                  |      |
| 291 | Petunidin 3-glucoside-5-(6''-acetylglucoside)                               | [M+Na] <sup>+</sup> | C30H35O18     | 706.17156                        |                  |      |                  |     | 9.4E+05          | 0.0  |                  |      |
| 292 | PG(12:0/20:5(5Z,8Z,11Z,14Z,17Z))                                            | [M+H] <sup>+</sup>  | C38H65O10P    | 713.43881                        | 9.8E+05          | 0.3  |                  |     |                  |      | 9.5E+04          | -1.6 |
| 293 | PC(10:0/21:0)                                                               | [M+H] <sup>+</sup>  | C39H78NO8P    | 720.55378                        |                  |      |                  |     | 4.2E+05          | -0.9 |                  |      |
| 294 | Apigenin 7-(2'',6''-di-p-coumarylglucoside)                                 | [M+H] <sup>+</sup>  | C39H32O14     | 725.18648                        | 4.7E+05          | 2.6  |                  |     |                  |      |                  |      |
| 295 | PC(12:0/20:4(5Z,8Z,11Z,14Z))                                                | [M+H] <sup>+</sup>  | C40H72NO8P    | 726.50683                        |                  |      |                  |     | 5.6E+05          | -1.1 | 1.3E+05          | -2.2 |
| 296 | Gomphrenin-V                                                                | [M+H] <sup>+</sup>  | C34H34N2O16   | 727.19811                        | 5.3E+05          | 0.6  |                  |     |                  |      |                  |      |
| 297 | Isoliquiritigenin 4-O-(5'''-O-feruloyl)-apiofuranosyl-(1'''->2'')-glucoside | [M+H] <sup>+</sup>  | C36H38O16     | 727.22326                        |                  |      |                  |     | 5.3E+05          | -0.9 |                  |      |
| 298 | Adiantifoline                                                               | [M+H] <sup>+</sup>  | C42H50N2O9    | 727.35891                        | 4.3E+05          | -2.3 |                  |     |                  |      |                  |      |
| 299 | DG(20:4(5Z,8Z,11Z,14Z)/24:1(15Z)/0:0)                                       | [M+H] <sup>+</sup>  | C47H82O5      | 727.62350                        | 4.2E+05          | -2.1 |                  |     |                  |      |                  |      |
| 300 | PG(12:0/21:0)                                                               | [M+H] <sup>+</sup>  | C39H77O10P    | 737.53271                        |                  |      |                  |     | 9.8E+05          | 2.2  |                  |      |
| 301 | PG(O-16:0/17:2(9Z,12Z))                                                     | [M+Na] <sup>+</sup> | C39H75O9P     | 741.50409                        |                  |      |                  |     | 4.5E+05          | 0.8  |                  |      |
| 302 | Apigenin 7-rhamnoside-4'-rutinoside                                         | [M+Na] <sup>+</sup> | C33H40O18     | 747.21069                        |                  |      |                  |     | 5.0E+05          | -0.5 |                  |      |
| 303 | Phalluside-1                                                                | [M+Na] <sup>+</sup> | C41H75NO9     | 748.53340                        |                  |      |                  |     | 7.5E+05          | 0.0  |                  |      |
| 304 | 3-Nonaprenyl-4-hydroxybenzoate                                              | [M+H] <sup>+</sup>  | C52H78O3      | 751.60237                        |                  |      |                  |     | 5.6E+05          | -0.7 |                  |      |
| 305 | Amataine                                                                    | [M+K] <sup>+</sup>  | C43H48N4O6    | 755.32054                        |                  |      |                  |     | 5.5E+05          | 0.0  |                  |      |
| 306 | PC(12:0/22:1(11Z))                                                          | [M+H] <sup>+</sup>  | C42H82NO8P    | 760.58508                        |                  |      |                  |     | 4.1E+05          | 0.3  |                  |      |
| 307 | Ophiopogonin B                                                              | [M+K] <sup>+</sup>  | C39H62O12     | 761.38729                        |                  |      |                  |     | 8.6E+05          | -0.6 |                  |      |
| 308 | PI(12:0/15:1(9Z))                                                           | [M+Na] <sup>+</sup> | C36H67O13P    | 761.42115                        | 7.5E+05          | 1.2  |                  |     |                  |      |                  |      |
| 309 | PI(O-16:0/16:0)                                                             | [M+H] <sup>+</sup>  | C41H81O12P    | 797.55384                        |                  |      |                  |     | 6.3E+05          | 0.5  |                  |      |
| 310 | DG(22:2(13Z,16Z)/24:1(15Z)/0:0)                                             | [M+K] <sup>+</sup>  | C49H90O5      | 797.64199                        |                  |      |                  |     | 4.6E+05          | -0.7 |                  |      |
| 311 | PI(13:0/20:4(5Z,8Z,11Z,14Z))                                                | [M+H] <sup>+</sup>  | C42H73O13P    | 817.48616                        |                  |      |                  |     | 5.3E+05          | -2.1 |                  |      |
| 312 | PE(22:4(7Z,10Z,13Z,16Z)/P-18:0)                                             | [M+K] <sup>+</sup>  | C45H82NO7P    | 818.54605                        |                  |      |                  |     | 4.3E+05          | -0.1 |                  |      |

Table S1: Untargeted metabolic profiling of Goji Berries hydroalcoholic extracts by ESI(+) FT-R MS

| #   | Putative annotation <sup>a</sup>                         | Ion                 | Formula (M)    | m/z <sub>Theo</sub> <sup>b</sup> | BL1 <sup>c</sup> | ppm | BL2 <sup>c</sup> | ppm | SL1 <sup>c</sup> | ppm | SL2 <sup>c</sup> | ppm |
|-----|----------------------------------------------------------|---------------------|----------------|----------------------------------|------------------|-----|------------------|-----|------------------|-----|------------------|-----|
| 313 | PS(22:0/22:1(11Z))                                       | [M+K] <sup>+</sup>  | C50H96NO10P    | 940.64034                        | 4.2E+05          | 1.4 |                  |     |                  |     |                  |     |
| 314 | TG(16:0/20:2(11Z,14Z)/22:6(4Z,7Z,10Z,13Z,16Z,19Z))[iso6] | [M+K] <sup>+</sup>  | C61H102O6      | 969.73080                        |                  |     |                  |     | 3.5E+05          | 0.2 |                  |     |
| 315 | (S)-3-Hydroxydodecanoyl-CoA                              | [M+Na] <sup>+</sup> | C33H58N7O18P3S | 988.26641                        |                  |     |                  |     | 4.2E+05          | 0.4 |                  |     |

<sup>a</sup> MG Monoacylglycerol; DG Diacylglycerol; TG Triacylglycerol; GalCer Galactosylceramide; PA Phosphatidic acid; PC Phosphatidylcholine; PE Phosphatidylethanolamine; PG Glycerophospholipids; PI Phosphatidylinositol; PS Phosphatidylserine; SQMG Glycosylmonoacylglycerols; DHAP Dihydroxyacetone phosphate; DNP Dinitrophenyl

<sup>b</sup> Theoretical m/z

<sup>c</sup> BL1 and BL2 stand for Big Lifeberry harvested in August and October, respectively; SL1 and SL2 stand for Sweet Lifeberry harvested in August and October, respectively.

Table S2: Untargeted metabolic profiling of Goji Berries hydroalcoholic extracts by ESI(-) FT-ICR MS

| #  | Putative annotation <sup>a</sup> | Ion     | Formula  | m/z <sub>Theo</sub> <sup>b</sup> | BL1 <sup>c</sup> | ppm  | BL2 <sup>c</sup> | ppm  | SL1 <sup>c</sup> | ppm  | SL2 <sup>c</sup> | ppm  |
|----|----------------------------------|---------|----------|----------------------------------|------------------|------|------------------|------|------------------|------|------------------|------|
| 1  | Phosphonate                      | [M-H]-  | PH3O3    | 80.97470                         |                  |      | 3.4E+05          | -1.9 |                  |      |                  |      |
| 2  | 1,4-Lactone                      | [M-H]-  | C4H6O2   | 85.02950                         | 1.3E+06          | 0.2  |                  |      |                  |      |                  |      |
| 3  | (R)-Lactate                      | [M-H]-  | C3H6O3   | 89.02442                         | 4.3E+06          | -0.1 | 3.6E+05          | -1.8 | 4.0E+05          | -1.5 | 6.7E+04          | 1.2  |
| 4  | Dimethyl sulfone                 | [M-H]-  | C2H6O2S  | 93.00157                         |                  |      |                  |      | 5.8E+05          | -2.2 |                  |      |
| 5  | Orthophosphate                   | [M-H]-  | H3PO4    | 96.96962                         | 9.9E+05          | -1.6 | 5.0E+05          | 2.0  | 4.7E+05          | 2.0  | 7.2E+04          | 1.3  |
| 6  | Cyclohexylamine                  | [M-H]-  | C6H13N   | 98.09752                         |                  |      |                  |      | 3.8E+05          | -3.0 |                  |      |
| 7  | Malonic acid                     | [M-H]-  | C3H4O4   | 103.00368                        |                  |      |                  |      |                  |      | 9.9E+04          | 3.0  |
| 8  | 3-Aminopropionaldehyde           | [M+Cl]- | C3H7NO   | 108.02217                        | 7.2E+05          | 2.4  |                  |      |                  |      |                  |      |
| 9  | Glyoxylic acid                   | [M+Cl]- | C2H2O3   | 108.96980                        |                  |      | 7.6E+05          | 1.8  |                  |      |                  |      |
| 10 | Uracil                           | [M-H]-  | C4H4N2O2 | 111.02000                        |                  |      |                  |      |                  |      | 4.4E+04          | -1.7 |
| 11 | Fumaric acid                     | [M-H]-  | C4H4O4   | 115.00368                        | 7.8E+05          | -0.4 |                  |      |                  |      |                  |      |
| 12 | 3-Oxopentanoic acid              | [M-H]-  | C5H8O3   | 115.04007                        |                  |      | 4.2E+05          | 1.2  |                  |      | 7.5E+04          | -2.9 |
| 13 | Succinic acid                    | [M-H]-  | C4H6O4   | 117.01933                        | 1.0E+06          | -1.1 | 1.1E+06          | 0.8  |                  |      | 9.0E+04          | 1.9  |
| 14 | 2-Hydroxyethanesulfonate         | [M-H]-  | C2H6O4S  | 124.99140                        | 5.2E+05          | -1.1 |                  |      |                  |      |                  |      |
| 15 | Pyroglutamic acid                | [M-H]-  | C5H7NO3  | 128.03532                        |                  |      |                  |      |                  |      | 5.7E+04          | 2.8  |
| 16 | Citraconic acid                  | [M-H]-  | C5H6O4   | 129.01933                        |                  |      | 4.2E+05          | 0.9  |                  |      |                  |      |
| 17 | 3-Methylindole                   | [M-H]-  | C9H9N    | 130.06622                        |                  |      |                  |      | 4.7E+05          | 2.2  | 1.0E+05          | 1.2  |
| 18 | Asparagine                       | [M-H]-  | C4H8N2O3 | 131.04622                        |                  |      |                  |      |                  |      | 6.1E+04          | -1.2 |
| 19 | Aspartate                        | [M-H]-  | C4H7NO4  | 132.03023                        | 8.0E+05          | 1.8  | 1.4E+06          | -0.2 |                  |      |                  |      |
| 20 | L-Malic acid                     | [M-H]-  | C4H6O5   | 133.01425                        | 1.9E+07          | 0.1  | 3.0E+07          | 0.0  | 2.0E+06          | -0.4 | 1.7E+05          | -0.1 |
| 21 | Threonic acid                    | [M-H]-  | C4H8O5   | 135.02990                        | 5.0E+05          | -0.6 | 4.6E+05          | 1.6  |                  |      |                  |      |
| 22 | Proline betaine                  | [M-H]-  | C7H13NO2 | 142.08735                        |                  |      |                  |      | 9.5E+05          | 2.8  |                  |      |
| 23 | (E)-2-Methylglutaconic acid      | [M-H]-  | C6H8O4   | 143.03498                        |                  |      | 1.6E+06          | 1.3  |                  |      | 4.4E+05          | -0.4 |
| 24 | 3-Dehydroxycarnitine             | [M-H]-  | C7H15NO2 | 144.10300                        | 1.3E+06          | 1.0  |                  |      |                  |      |                  |      |
| 25 | Solerol                          | [M-H]-  | C6H10O4  | 145.05063                        | 4.7E+05          | 0.9  | 4.8E+05          | 1.9  |                  |      | 2.0E+05          | -1.1 |



Table S2: Untargeted metabolic profiling of Goji Berries hydroalcoholic extracts by ESI(-) FT-ICR MS

| #  | Putative annotation <sup>a</sup> | Ion     | Formula   | m/z <sub>Theo</sub> <sup>b</sup> | BL1 <sup>c</sup> | ppm  | BL2 <sup>c</sup> | ppm  | SL1 <sup>c</sup> | ppm  | SL2 <sup>c</sup> | ppm  |
|----|----------------------------------|---------|-----------|----------------------------------|------------------|------|------------------|------|------------------|------|------------------|------|
| 26 | Cytosine                         | [M+Cl]- | C4H5N3O   | 146.01266                        |                  |      |                  |      |                  |      | 9.3E+04          | 0.9  |
| 27 | L-Glutamic acid                  | [M-H]-  | C5H9NO4   | 146.04588                        | 4.8E+05          | 1.8  | 1.5E+06          | 1.8  | 7.1E+05          | -2.9 |                  |      |
| 28 | Citramalic acid                  | [M-H]-  | C5H8O5    | 147.02990                        |                  |      | 5.3E+05          | -0.4 |                  |      |                  |      |
| 29 | 1-Methylhypoxanthine             | [M-H]-  | C6H6N4O   | 149.04688                        |                  |      | 5.7E+05          | -1.0 | 9.8E+05          | -0.1 |                  |      |
| 30 | 3-Amino-2-piperidone             | [M+Cl]- | C5H10N2O  | 149.04871                        | 4.5E+05          | 2.4  | 5.7E+05          | -2.2 | 9.8E+05          | -0.1 |                  |      |
| 31 | Thiopurine                       | [M-H]-  | C5H4N4S   | 151.00839                        |                  |      | 1.2E+06          | -0.8 |                  |      | 2.0E+05          | -1.1 |
| 32 | 3-methyl-octanoic acid           | [M-H]-  | C9H18O2   | 157.12340                        | 5.7E+05          | 0.0  | 1.4E+06          | -0.5 |                  |      | 4.9E+05          | -2.8 |
| 33 | Nicotine imine                   | [M-H]-  | C10H13N2  | 160.10060                        |                  |      |                  |      | 8.1E+05          | 1.7  |                  |      |
| 34 | (2R,3S)-2,3-Dimethylmalate       | [M-H]-  | C6H10O5   | 161.04555                        | 5.5E+05          | 0.8  | 2.6E+06          | 1.1  |                  |      |                  |      |
| 35 | 2-Dehydro-D-xylonate             | [M-H]-  | C5H8O6    | 163.02481                        |                  |      | 6.4E+05          | -1.2 |                  |      |                  |      |
| 36 | 5-methyl-5-hexenoic acid         | [M+Cl]- | C7H12O2   | 163.05313                        | 4.3E+05          | -2.4 | 1.6E+07          | 2.6  |                  |      |                  |      |
| 37 | Rhamnose                         | [M-H]-  | C6H12O5   | 163.06120                        |                  |      | 1.2E+07          | 0.5  |                  |      |                  |      |
| 38 | L-Lysine 1,6-lactam              | [M+Cl]- | C6H12N2O  | 163.06436                        |                  |      |                  |      | 1.6E+07          | -1.4 |                  |      |
| 39 | Arabinonic acid                  | [M-H]-  | C5H10O6   | 165.04046                        |                  |      |                  |      |                  |      | 4.2E+04          | -0.9 |
| 40 | Phenylacetothiohydroximate       | [M-H]-  | C8H9NOS   | 166.03321                        |                  |      | 6.1E+05          | -1.4 |                  |      |                  |      |
| 41 | 2-Furoylglycine                  | [M-H]-  | C7H7NO4   | 168.03023                        |                  |      | 1.1E+06          | 1.8  |                  |      |                  |      |
| 42 | Diphenylamine                    | [M-H]-  | C12H11N   | 168.08187                        |                  |      | 1.1E+06          | -2.2 |                  |      |                  |      |
| 43 | 2-Octenedioic acid               | [M-H]-  | C8H12O4   | 171.06628                        | 4.1E+05          | 1.2  | 1.3E+06          | 0.3  |                  |      |                  |      |
| 44 | Decanoic acid                    | [M-H]-  | C10H20O2  | 171.13905                        | 3.3E+05          | 2.7  | 8.4E+05          | 2.6  |                  |      | 4.9E+05          | 0.3  |
| 45 | Dehydroascorbic acid             | [M-H]-  | C6H6O6    | 173.00916                        | 3.2E+05          | -1.5 | 8.7E+05          | -0.5 |                  |      |                  |      |
| 46 | 2-Propylglutaric acid            | [M-H]-  | C8H14O4   | 173.08193                        | 3.2E+05          | -1.5 |                  |      |                  |      | 2.1E+05          | 0.6  |
| 47 | Monodehydroascorbate             | [M-H]-  | C6H7O6    | 174.01699                        |                  |      |                  |      | 8.2E+05          | 1.8  |                  |      |
| 48 | Canavanine                       | [M-H]-  | C5H12N4O3 | 175.08366                        | 3.8E+05          | -2.7 |                  |      |                  |      |                  |      |
| 49 | Caffeic acid quinone             | [M-H]-  | C9H6O4    | 177.01933                        |                  |      |                  |      |                  |      | 7.5E+04          | 2.8  |
| 50 | 2-Octenoic acid                  | [M+Cl]- | C8H14O2   | 177.06878                        | 5.2E+05          | -1.2 |                  |      |                  |      | 6.1E+04          | -0.6 |
| 51 | (E)-2-Methylglutaconic acid      | [M+Cl]- | C6H8O4    | 179.01166                        |                  |      |                  |      | 8.9E+05          | 1.4  |                  |      |

Table S2: Untargeted metabolic profiling of Goji Berries hydroalcoholic extracts by ESI(-) FT-ICR MS

| #  | Putative annotation <sup>a</sup>      | Ion     | Formula   | m/z <sub>Theo</sub> <sup>b</sup> | BL1 <sup>c</sup> | ppm  | BL2 <sup>c</sup> | ppm  | SL1 <sup>c</sup> | ppm  | SL2 <sup>c</sup> | ppm  |
|----|---------------------------------------|---------|-----------|----------------------------------|------------------|------|------------------|------|------------------|------|------------------|------|
| 52 | D-Aldose                              | [M-H]-  | C6H12O6   | 179.05611                        | 9.3E+06          | -0.7 | 1.3E+07          | -0.5 | 2.5E+06          | 1.2  | 2.5E+05          | 0.8  |
| 53 | Paraxanthine                          | [M-H]-  | C7H8N4O2  | 179.05745                        |                  |      | 4.4E+06          | -2.5 |                  |      | 2.5E+05          | 0.7  |
| 54 | O-Carbamoyl-L-serine                  | [M+Cl]- | C4H8N2O4  | 183.01781                        |                  |      |                  |      | 9.8E+05          | 0.9  |                  |      |
| 55 | L-Methionine                          | [M+Cl]- | C5H11NO2S | 184.02045                        |                  |      |                  |      |                  |      | 5.9E+04          | -1.0 |
| 56 | 2-Amino-4-nitrotoluene                | [M+Cl]- | C7H8N2O2  | 187.02798                        |                  |      |                  |      | 8.6E+05          | -0.4 |                  |      |
| 57 | Citric acid                           | [M-H]-  | C6H8O7    | 191.01973                        | 4.5E+06          | 0.3  | 4.3E+07          | 0.6  | 2.8E+06          | 0.7  |                  |      |
| 58 | Quinic acid                           | [M-H]-  | C7H12O6   | 191.05611                        | 4.1E+06          | 0.4  | 8.9E+06          | 0.7  | 6.4E+05          | 0.5  |                  |      |
| 59 | Galacturonic acid                     | [M-H]-  | C6H10O7   | 193.03538                        | 2.1E+06          | 2.9  | 2.5E+06          | 1.7  | 8.0E+05          | 2.6  |                  |      |
| 60 | Phenanthrene-9,10-oxide               | [M-H]-  | C14H10O   | 193.06589                        | 1.4E+06          | 0.2  |                  |      |                  |      |                  |      |
| 61 | 1-O-Methyl-myo-inositol               | [M-H]-  | C7H14O6   | 193.07176                        | 1.7E+06          | 2.2  |                  |      |                  |      |                  |      |
| 62 | Caffeine                              | [M-H]-  | C8H10N4O2 | 193.07310                        | 1.5E+06          | -0.7 |                  |      |                  |      |                  |      |
| 63 | 2-methyl-octanoic acid                | [M+Cl]- | C9H18O2   | 193.10008                        |                  |      | 1.4E+06          | 0.2  |                  |      |                  |      |
| 64 | Tetrahydroxypteridine                 | [M-H]-  | C6H4N4O4  | 195.01598                        |                  |      |                  |      | 9.0E+05          | 2.3  |                  |      |
| 65 | 2-Propylsuccinic acid                 | [M+Cl]- | C7H12O4   | 195.04296                        |                  |      |                  |      | 1.0E+06          | -0.8 |                  |      |
| 66 | D-Gluconic acid                       | [M-H]-  | C6H12O7   | 195.05103                        | 5.7E+05          | 0.6  | 8.5E+05          | 0.5  |                  |      |                  |      |
| 67 | 9-acetyl pelargonic acid              | [M-H]-  | C11H20O3  | 199.13397                        |                  |      |                  |      | 2.1E+06          | 2.9  |                  |      |
| 68 | Lauric acid                           | [M-H]-  | C12H24O2  | 199.17035                        | 3.6E+05          | 0.6  |                  |      |                  |      | 7.8E+05          | 0.2  |
| 69 | Sebacic acid                          | [M-H]-  | C10H18O4  | 201.11323                        |                  |      | 8.0E+05          | 1.1  |                  |      |                  |      |
| 70 | N5-(L-1-Carboxyethyl)-L-ornithine     | [M-H]-  | C8H16N2O4 | 203.10373                        |                  |      | 8.7E+05          | 2.9  |                  |      |                  |      |
| 71 | 2-Methylcitric acid                   | [M-H]-  | C7H10O7   | 205.03538                        | 4.1E+05          | 2.5  | 1.1E+06          | 1.7  |                  |      |                  |      |
| 72 | Thiolactomycin                        | [M-H]-  | C11H14O2S | 209.06417                        |                  |      | 1.0E+06          | 2.8  | 1.1E+06          | 2.9  |                  |      |
| 73 | 1,3,7-Trimethyluric acid              | [M-H]-  | C8H10N4O3 | 209.06801                        | 3.5E+05          | -0.1 |                  |      |                  |      |                  |      |
| 74 | N-(3-oxo-hexanoyl)-homoserine lactone | [M-H]-  | C10H15NO4 | 212.09283                        | 3.2E+05          | -2.7 | 1.2E+06          | -2.9 |                  |      | 6.1E+04          | -2.9 |
| 75 | O-Phospho-4-hydroxy-L-threonine       | [M-H]-  | C4H10NO7P | 214.01221                        | 1.8E+06          | -2.9 |                  |      |                  |      |                  |      |
| 76 | Aldohexose                            | [M+Cl]- | C6H12O6   | 215.03279                        | 2.1E+07          | -0.1 | 3.0E+07          | -1.2 | 2.5E+07          | 0.6  | 3.0E+06          | 1.9  |
| 77 | Theophylline                          | [M+Cl]- | C7H8N4O2  | 215.03413                        |                  |      | 2.4E+07          | 0.5  |                  |      |                  |      |

Table S2: Untargeted metabolic profiling of Goji Berries hydroalcoholic extracts by ESI(-) FT-ICR MS

| #   | Putative annotation <sup>a</sup>            | Ion     | Formula    | m/z <sub>Theo</sub> <sup>b</sup> | BL1 <sup>c</sup> | ppm  | BL2 <sup>c</sup> | ppm  | SL1 <sup>c</sup> | ppm  | SL2 <sup>c</sup> | ppm |
|-----|---------------------------------------------|---------|------------|----------------------------------|------------------|------|------------------|------|------------------|------|------------------|-----|
| 78  | 4-Amino-2-methyl-5-phosphomethylpyrimidine  | [M-H]-  | C6H10N3O4P | 218.03362                        | 6.5E+05          | -1.3 | 6.5E+05          | 1.7  | 6.8E+05          | -0.9 |                  |     |
| 79  | Pantothenate                                | [M-H]-  | C9H17NO5   | 218.10340                        | 4.0E+05          | -1.8 | 1.4E+06          | -0.6 |                  |      |                  |     |
| 80  | Phenylacetyl glycine dimethylamide          | [M-H]-  | C12H16N2O2 | 219.11390                        | 8.1E+05          | 1.4  |                  |      |                  |      |                  |     |
| 81  | 6-Benzylaminopurine                         | [M-H]-  | C12H11N5   | 224.09417                        |                  |      |                  |      | 1.2E+06          | 0.4  |                  |     |
| 82  | 5-Acetylamino-6-formylamino-3-methyluracil  | [M-H]-  | C8H10N4O4  | 225.06293                        | 8.7E+05          | -1.8 | 1.8E+06          | -2.9 |                  |      |                  |     |
| 83  | Myristoleic acid                            | [M-H]-  | C14H26O2   | 225.18600                        |                  |      |                  |      |                  |      | 1.0E+05          | 2.7 |
| 84  | Myristic acid                               | [M-H]-  | C14H28O2   | 227.20165                        | 4.9E+05          | -1.7 | 2.0E+06          | -0.4 | 1.1E+06          | 1.5  | 1.8E+06          | 2.0 |
| 85  | Nitro-L-arginine methyl ester               | [M-H]-  | C7H15N5O4  | 232.10513                        |                  |      | 2.4E+06          | 2.9  |                  |      |                  |     |
| 86  | Glycosminine                                | [M-H]-  | C15H12N2O  | 235.08769                        |                  |      |                  |      | 7.0E+05          | 2.0  |                  |     |
| 87  | Benzoyl phosphate                           | [M+Cl]- | C7H7O5P    | 236.97251                        | 3.5E+05          | -0.2 |                  |      |                  |      |                  |     |
| 88  | 3-Deoxy-D-manno-octulosonate                | [M-H]-  | C8H14O8    | 237.06159                        | 3.0E+05          | 2.1  |                  |      |                  |      |                  |     |
| 89  | N6-(delta2-Isopentenyl)-adenine             | [M+Cl]- | C10H13N5   | 238.08650                        |                  |      | 1.9E+06          | 1.4  |                  |      |                  |     |
| 90  | L-Tryptophan                                | [M+Cl]- | C11H12N2O2 | 239.05928                        | 3.8E+05          | -2.7 |                  |      |                  |      |                  |     |
| 91  | 6-Deoxy-5-ketofructose 1-phosphate          | [M-H]-  | C6H11O8P   | 241.01188                        | 7.6E+05          | 2.6  | 1.0E+06          | 1.5  | 1.5E+06          | -0.2 |                  |     |
| 92  | 6E,8E,14E-Hexadecatriene-10,12-diynoic acid | [M-H]-  | C16H18O2   | 241.12340                        |                  |      | 3.5E+06          | -2.5 |                  |      |                  |     |
| 93  | (+)-12-methyl myristic acid                 | [M-H]-  | C15H30O2   | 241.21730                        | 4.7E+05          | -0.3 | 1.9E+06          | -1.8 |                  |      | 1.1E+06          | 1.1 |
| 94  | Anthocyanin                                 | [M+Cl]- | C15H11O    | 242.05039                        | 1.1E+06          | 0.7  | 3.1E+06          | 1.6  |                  |      |                  |     |
| 95  | 1,3,5-Trihydroxyxanthone                    | [M-H]-  | C13H8O5    | 243.02990                        | 1.1E+06          | -1.1 |                  |      |                  |      |                  |     |
| 96  | 10,12-Tetradecadienal                       | [M+Cl]- | C14H24O    | 243.15212                        | 6.8E+05          | 1.4  |                  |      |                  |      |                  |     |
| 97  | Indoxyl sulfate                             | [M+Cl]- | C8H7NO4S   | 247.97898                        |                  |      |                  |      | 8.8E+06          | 0.4  |                  |     |
| 98  | Succinyl proline                            | [M+Cl]- | C9H13NO5   | 250.04877                        | 3.3E+05          | 0.6  |                  |      |                  |      |                  |     |
| 99  | Kinetin                                     | [M+Cl]- | C10H9N5O   | 250.05011                        | 6.0E+05          | 0.4  |                  |      |                  |      |                  |     |
| 100 | N-Feruloyl glycine                          | [M-H]-  | C12H13NO5  | 250.07210                        | 6.3E+05          | -0.5 |                  |      |                  |      |                  |     |
| 101 | 4-Methylumbelliferyl acetate                | [M+Cl]- | C12H10O4   | 253.02731                        |                  |      | 7.3E+05          | 0.8  |                  |      |                  |     |
| 102 | Palmitoleic acid                            | [M-H]-  | C16H30O2   | 253.21730                        | 6.6E+05          | 0.0  |                  |      |                  |      |                  |     |
| 103 | Phenylgalactoside                           | [M-H]-  | C12H16O6   | 255.08741                        |                  |      | 9.1E+05          | 0.1  |                  |      |                  |     |

Table S2: Untargeted metabolic profiling of Goji Berries hydroalcoholic extracts by ESI(-) FT-ICR MS

| #   | Putative annotation <sup>a</sup>                      | Ion     | Formula    | m/z <sub>Theo</sub> <sup>b</sup> | BL1 <sup>c</sup> | ppm  | BL2 <sup>c</sup> | ppm  | SL1 <sup>c</sup> | ppm  | SL2 <sup>c</sup> | ppm  |
|-----|-------------------------------------------------------|---------|------------|----------------------------------|------------------|------|------------------|------|------------------|------|------------------|------|
| 104 | Palmitic acid                                         | [M-H]-  | C16H32O2   | 255.23295                        | 1.3E+06          | 0.1  | 3.6E+06          | -1.6 | 1.7E+06          | -2.4 | 5.8E+06          | -2.1 |
| 105 | 4-Methyl-5-(2-phosphoethyl)-thiazole                  | [M+Cl]- | C6H10NO4PS | 257.97622                        |                  |      |                  |      | 1.6E+06          | -1.2 |                  |      |
| 106 | N-Sulfo-D-glucosamine                                 | [M-H]-  | C6H13NO8S  | 258.02891                        |                  |      |                  |      | 9.6E+05          | 2.4  |                  |      |
| 107 | N-Acetyl-L-tyrosine                                   | [M+Cl]- | C11H13NO4  | 258.05386                        |                  |      |                  |      | 1.7E+06          | 0.7  |                  |      |
| 108 | Skimmianine                                           | [M-H]-  | C14H13NO4  | 258.07718                        |                  |      |                  |      | 1.8E+06          | 1.2  | 6.2E+04          | 2.6  |
| 109 | Hexanoylcarnitine                                     | [M-H]-  | C13H25NO4  | 258.17108                        |                  |      |                  |      | 2.0E+06          | -0.9 |                  |      |
| 110 | 4Z,7Z,10Z-octadecatrienenitrile                       | [M-H]-  | C18H29N    | 258.22272                        |                  |      |                  |      | 1.3E+06          | 1.0  |                  |      |
| 111 | Methyl jasmonate                                      | [M+Cl]- | C13H20O3   | 259.11065                        |                  |      |                  |      |                  |      | 5.5E+04          | 2.3  |
| 112 | Mannitol-1-phosphate                                  | [M-H]-  | C6H15O9P   | 261.03700                        |                  |      | 1.5E+06          | 2.1  |                  |      | 5.2E+05          | 0.3  |
| 113 | 1,8-Diazacyclotetradecane-2,9-dione                   | [M+Cl]- | C12H22N2O2 | 261.13753                        |                  |      | 8.0E+05          | -1.9 |                  |      |                  |      |
| 114 | gamma-Fagarine                                        | [M+Cl]- | C13H11NO3  | 264.04329                        |                  |      | 7.0E+05          | -2.8 |                  |      |                  |      |
| 115 | Oxycarboxin                                           | [M-H]-  | C12H13NO4S | 266.04925                        |                  |      |                  |      | 1.0E+06          | 0.1  |                  |      |
| 116 | S-Ribosyl-L-homocysteine                              | [M-H]-  | C9H17NO6S  | 266.07038                        |                  |      |                  |      | 1.1E+06          | 0.4  |                  |      |
| 117 | Neuraminic acid                                       | [M-H]-  | C9H17NO8   | 266.08814                        |                  |      |                  |      | 1.3E+06          | -0.6 |                  |      |
| 118 | Acetylcarnosine                                       | [M-H]-  | C11H15N4O4 | 266.10205                        |                  |      |                  |      | 9.4E+05          | -2.9 |                  |      |
| 119 | (-)-Caaverine                                         | [M-H]-  | C17H17NO2  | 266.11865                        |                  |      |                  |      | 1.3E+06          | 2.7  |                  |      |
| 120 | Dimethoxyhydroxycaffeine                              | [M-H]-  | C10H14N4O5 | 269.08914                        | 3.3E+07          | -1.7 | 1.5E+07          | 0.4  | 3.4E+06          | 1.3  |                  |      |
| 121 | Doxylamine                                            | [M-H]-  | C17H22N2O  | 269.16594                        |                  |      | 8.0E+05          | 1.1  |                  |      |                  |      |
| 122 | 10E,12Z-Hexadecadienal                                | [M+Cl]- | C16H28O    | 271.18342                        |                  |      |                  |      | 1.3E+06          | -1.7 | 7.5E+04          | -1.9 |
| 123 | 8-Allyl-2-phenyl-8H-1,3a,8-triaza-cyclopenta[a]indene | [M-H]-  | C18H15N3   | 272.11932                        |                  |      | 7.7E+05          | 0.2  |                  |      |                  |      |
| 124 | 4'-O-Methylnorbelladine                               | [M-H]-  | C16H19NO3  | 272.12922                        |                  |      | 8.6E+05          | 1.7  |                  |      |                  |      |
| 125 | 10Z,13Z,16Z-nonadecatrienenitrile                     | [M-H]-  | C19H31N    | 272.23837                        | 6.1E+05          | 2.3  |                  |      |                  |      |                  |      |
| 126 | Phosphoallohydroxy-L-lysine                           | [M+Cl]- | C6H15N2O6P | 277.03617                        | 1.3E+07          | 0.5  | 1.7E+07          | 2.8  | 1.5E+06          | -0.3 |                  |      |
| 127 | Oleic acid                                            | [M-H]-  | C18H34O2   | 281.24860                        | 3.8E+05          | 0.3  | 1.1E+06          | -2.4 |                  |      |                  |      |
| 128 | 5-O-Methylgenistein                                   | [M-H]-  | C16H12O5   | 283.06120                        | 6.5E+05          | 2.4  | 7.4E+05          | -2.6 |                  |      |                  |      |
| 129 | Stearic acid                                          | [M-H]-  | C18H36O2   | 283.26425                        | 5.4E+05          | 2.1  | 1.3E+06          | -1.2 | 1.2E+06          | 2.7  | 5.8E+06          | -0.6 |

Table S2: Untargeted metabolic profiling of Goji Berries hydroalcoholic extracts by ESI(-) FT-ICR MS

| #   | Putative annotation <sup>a</sup>                      | Ion     | Formula     | m/z <sub>Theo</sub> <sup>b</sup> | BL1 <sup>c</sup> | ppm  | BL2 <sup>c</sup> | ppm  | SL1 <sup>c</sup> | ppm  | SL2 <sup>c</sup> | ppm  |
|-----|-------------------------------------------------------|---------|-------------|----------------------------------|------------------|------|------------------|------|------------------|------|------------------|------|
| 130 | 2,6-Naphthalenedisulfonic acid                        | [M-H]-  | C10H8O6S2   | 286.96895                        | 4.9E+05          | -2.3 |                  |      |                  |      |                  |      |
| 131 | 2-[3-Ethyl-5-(4-methoxyphenyl)-1H-pyrazol-4-yl]phenol | [M-H]-  | C18H18N2O2  | 293.12955                        |                  |      | 8.3E+05          | -1.3 |                  |      |                  |      |
| 132 | 18:2(5Z,9Z)(16Me)                                     | [M-H]-  | C19H34O2    | 293.24860                        |                  |      | 4.1E+06          | -0.4 |                  |      |                  |      |
| 133 | 1,4-benzothiazine-o-quinonimine                       | [M-H]-  | C12H11N2O5S | 294.03159                        |                  |      | 1.1E+06          | -0.5 |                  |      |                  |      |
| 134 | N6,N6-Dimethyladenosine                               | [M-H]-  | C12H17N5O4  | 294.12078                        | 7.9E+05          | -2.2 | 1.2E+06          | -2.2 | 1.1E+06          | -0.9 |                  |      |
| 135 | L-alpha-glutamyl-L-hydroxyproline                     | [M+Cl]- | C10H16N2O6  | 295.07024                        | 3.4E+06          | 1.5  | 5.1E+06          | 1.5  | 9.9E+05          | -2.7 |                  |      |
| 136 | Albendazole sulfone                                   | [M-H]-  | C12H15N3O4S | 296.07105                        | 4.1E+05          | -1.5 |                  |      |                  |      |                  |      |
| 137 | D-Ornalline                                           | [M+Cl]- | C10H18N2O6  | 297.08589                        | 1.1E+06          | -1.9 | 9.1E+05          | -0.2 |                  |      |                  |      |
| 138 | 5-Hydroxy-7-methoxy-6,8-di-C-methylflavanone          | [M-H]-  | C18H18O4    | 297.11323                        |                  |      |                  |      | 1.2E+06          | 2.7  |                  |      |
| 139 | 5,7,4'-Trimethoxyflavan                               | [M-H]-  | C18H20O4    | 299.12888                        |                  |      |                  |      |                  |      | 1.4E+05          | -1.1 |
| 140 | 11alpha-Hydroxyandrost-1,4-diene-3,17-dione           | [M-H]-  | C19H24O3    | 299.16527                        |                  |      | 4.6E+05          | -0.9 |                  |      |                  |      |
| 141 | 5-Methyl-6-hydroxyluteolinidin                        | [M-H]-  | C16H15O6    | 302.07959                        |                  |      |                  |      |                  |      | 1.2E+05          | -0.5 |
| 142 | O-Acetylated sialic acid                              | [M-H]-  | C11H19NO9   | 308.09870                        | 4.1E+05          | -1.2 | 7.8E+05          | 0.6  |                  |      | 1.9E+05          | -2.7 |
| 143 | Botrydial                                             | [M-H]-  | C17H26O5    | 309.17075                        | 5.1E+05          | -0.1 | 1.3E+06          | -0.7 |                  |      |                  |      |
| 144 | alpha-Obcurine                                        | [M+Cl]- | C17H26N2O   | 309.17392                        | 5.1E+05          | 1.4  | 1.3E+06          | -1.8 |                  |      |                  |      |
| 145 | 4-Hydroxycinnamyl alcohol 4-D-glucoside               | [M-H]-  | C15H20O7    | 311.11363                        | 3.1E+06          | 0.5  | 1.4E+06          | -2.9 |                  |      |                  |      |
| 146 | Angustine                                             | [M-H]-  | C20H15N3O   | 312.11424                        | 5.9E+05          | 1.8  | 4.6E+05          | -1.7 |                  |      |                  |      |
| 147 | Rosinidin                                             | [M-H]-  | C17H15O6    | 314.07959                        | 1.3E+06          | 2.4  |                  |      |                  |      |                  |      |
| 148 | N-Glycolyl-D-mannosamine 6-phosphate                  | [M-H]-  | C8H16NO10P  | 316.04391                        |                  |      | 5.7E+05          | 0.6  |                  |      |                  |      |
| 149 | Arctolide                                             | [M-H]-  | C17H20O6    | 319.11871                        |                  |      | 4.7E+05          | 2.6  |                  |      |                  |      |
| 150 | N-oleoyl ethanolamine                                 | [M-H]-  | C20H39NO2   | 324.29080                        |                  |      | 5.7E+05          | 2.1  | 8.9E+05          | -1.3 |                  |      |
| 151 | MG(0:0/16:1(9Z)/0:0)                                  | [M-H]-  | C19H36O4    | 327.25408                        | 4.3E+05          | 2.8  |                  |      |                  |      |                  |      |
| 152 | 22:4(4Z,7Z,10Z,13E)                                   | [M-H]-  | C22H36O2    | 331.26425                        |                  |      |                  |      | 1.3E+06          | -0.1 | 1.3E+05          | 3.0  |
| 153 | 1-Methylguanosine                                     | [M+Cl]- | C11H15N5O5  | 332.07672                        |                  |      | 4.5E+05          | -0.6 |                  |      |                  |      |
| 154 | 9,13-cis-retinoate                                    | [M+Cl]- | C20H27O2    | 334.17051                        |                  |      | 2.2E+06          | 2.7  |                  |      |                  |      |
| 155 | Lobelanine                                            | [M-H]-  | C22H25NO2   | 334.18125                        |                  |      | 1.1E+06          | -1.0 |                  |      |                  |      |

Table S2: Untargeted metabolic profiling of Goji Berries hydroalcoholic extracts by ESI(-) FT-ICR MS

| #   | Putative annotation <sup>a</sup>                                          | Ion     | Formula      | m/z <sub>Theo</sub> <sup>b</sup> | BL1 <sup>c</sup> | ppm  | BL2 <sup>c</sup> | ppm  | SL1 <sup>c</sup> | ppm  | SL2 <sup>c</sup> | ppm  |
|-----|---------------------------------------------------------------------------|---------|--------------|----------------------------------|------------------|------|------------------|------|------------------|------|------------------|------|
| 156 | Pseudopurpurin                                                            | [M+Cl]- | C15H8O7      | 334.99640                        |                  |      | 1.2E+06          | 0.9  |                  |      |                  |      |
| 157 | N-Acetyl-D-galactosamine 1-phosphate                                      | [M+Cl]- | C8H16NO9P    | 336.02567                        |                  |      |                  |      |                  |      | 3.8E+05          | -1.0 |
| 158 | 6-(2-Amino-2-carboxyethyl)-7,8-dioxo-hexahydroquinoline-2,4-dicarboxylate | [M-H]-  | C14H14N2O8   | 337.06774                        | 5.6E+05          | 1.0  |                  |      |                  |      |                  |      |
| 159 | 5'-Hydroxy-2'-methoxy-3,4-methylenedioxyfurano[2'',3':4',3']chalcone      | [M-H]-  | C19H14O6     | 337.07176                        | 5.2E+05          | 2.3  | 2.9E+06          | -1.3 |                  |      | 6.3E+05          | -1.8 |
| 160 | 3''-Deamino-3''-oxonicotianamine                                          | [M+Cl]- | C12H18N2O7   | 337.08080                        |                  |      | 9.8E+05          | 0.9  | 4.7E+06          | 1.3  |                  |      |
| 161 | D-Glucosyl-D-mannose                                                      | [M-H]-  | C12H22O11    | 341.10894                        |                  |      |                  |      | 1.6E+06          | 2.9  | 3.1E+06          | -1.5 |
| 162 | 13(S)-HpOTrE(gamma)                                                       | [M+Cl]- | C18H30O4     | 345.18381                        |                  |      | 6.1E+05          | 2.0  |                  |      |                  |      |
| 163 | 7Z-eicosenoic acid                                                        | [M-H]-  | C20H38O2     | 345.25658                        |                  |      |                  |      |                  |      | 2.4E+05          | -0.9 |
| 164 | 2-(alpha-D-Mannosyl)-3-phosphoglycerate                                   | [M-H]-  | C9H17O12P    | 347.03849                        |                  |      |                  |      | 1.6E+06          | -2.4 |                  |      |
| 165 | 3',4',5'-Trimethoxyflavone                                                | [M+Cl]- | C18H16O5     | 347.06918                        |                  |      |                  |      | 1.2E+06          | 0.8  |                  |      |
| 166 | Arabino-galactose                                                         | [M+Cl]- | C11H20O10    | 347.07505                        |                  |      |                  |      | 1.2E+06          | 0.0  |                  |      |
| 167 | Machaerol C                                                               | [M-H]-  | C18H20O7     | 347.11363                        |                  |      |                  |      | 1.1E+06          | 2.0  |                  |      |
| 168 | trans-Anhydrotrophostachin                                                | [M-H]-  | C22H20O4     | 347.12888                        |                  |      |                  |      | 1.3E+06          | 0.0  |                  |      |
| 169 | Fruticosonine                                                             | [M+Cl]- | C20H28N2O    | 347.18957                        |                  |      |                  |      | 1.3E+06          | 3.0  |                  |      |
| 170 | Estradiol-17beta 3-sulfate                                                | [M-H]-  | C18H24O5S    | 351.12717                        | 4.7E+05          | 0.7  |                  |      |                  |      |                  |      |
| 171 | Chlorogenic acid                                                          | [M-H]-  | C16H18O9     | 353.08781                        | 1.3E+06          | -2.9 | 4.7E+06          | 2.8  |                  |      |                  |      |
| 172 | Pantetheine 4'-phosphate                                                  | [M-H]-  | C11H23N2O7PS | 357.08908                        |                  |      |                  |      | 1.3E+06          | -0.6 |                  |      |
| 173 | Galactosylhydroxylysine                                                   | [M+Cl]- | C12H24N2O8   | 359.12267                        | 2.9E+07          | -1.9 |                  |      | 9.6E+05          | -1.9 |                  |      |
| 174 | 3-Methoxytyramine-betaxanthin                                             | [M-H]-  | C18H20N2O6   | 359.12486                        |                  |      | 1.7E+07          | 1.5  |                  |      | 1.5E+05          | 0.3  |
| 175 | Monocrotaline                                                             | [M+Cl]- | C16H23NO6    | 360.12194                        | 4.2E+06          | 1.3  | 6.0E+06          | 1.2  |                  |      |                  |      |
| 176 | 5,7,3'-Trihydroxy-6,4',5'-trimethoxyflavanone                             | [M-H]-  | C18H18O8     | 361.09289                        |                  |      |                  |      | 1.7E+06          | -3.0 |                  |      |
| 177 | (+)-18-methyl-eicosanoic acid                                             | [M+Cl]- | C21H42O2     | 361.28788                        |                  |      |                  |      | 3.2E+06          | -0.4 |                  |      |
| 178 | C25:2 6,7-Epoxy highly branched isoprenoid                                | [M-H]-  | C25H46O      | 361.34759                        |                  |      |                  |      | 2.4E+06          | -2.3 |                  |      |
| 179 | 11-hydroperoxy-12,13-epoxy-9-octadecenoic acid                            | [M+Cl]- | C18H32O5     | 363.19438                        | 4.2E+05          | 2.9  |                  |      |                  |      |                  |      |
| 180 | NAC-DNP-Cys                                                               | [M+Cl]- | C11H11N3O7S  | 364.00117                        |                  |      | 8.8E+05          | 2.8  |                  |      |                  |      |
| 181 | 1-O-Galloyl-beta-D-glucose                                                | [M+Cl]- | C13H16O10    | 367.04375                        | 5.1E+05          | 2.0  | 9.5E+05          | -0.5 | 2.4E+06          | 2.6  |                  |      |

Table S2: Untargeted metabolic profiling of Goji Berries hydroalcoholic extracts by ESI(-) FT-ICR MS

| #   | Putative annotation <sup>a</sup>                                         | Ion     | Formula      | m/z <sub>Theo</sub> <sup>b</sup> | BL1 <sup>c</sup> | ppm  | BL2 <sup>c</sup> | ppm  | SL1 <sup>c</sup> | ppm  | SL2 <sup>c</sup> | ppm  |
|-----|--------------------------------------------------------------------------|---------|--------------|----------------------------------|------------------|------|------------------|------|------------------|------|------------------|------|
| 182 | Isopentenyl adenosine                                                    | [M+Cl]- | C15H21N5O4   | 370.12876                        | 5.0E+05          | -2.3 |                  |      |                  |      |                  |      |
| 183 | 24-norcholesterol                                                        | [M-H]-  | C26H44O      | 371.33194                        |                  |      |                  |      | 1.1E+06          | 2.7  |                  |      |
| 184 | Arachidonoylmorpholine                                                   | [M-H]-  | C24H39NO2    | 372.29080                        |                  |      |                  |      | 1.3E+06          | 0.6  |                  |      |
| 185 | Alamarine                                                                | [M+Cl]- | C19H18N2O4   | 373.09606                        | 2.5E+06          | 2.6  | 1.4E+06          | 2.6  |                  |      |                  |      |
| 186 | Nicotine glucuronide                                                     | [M+Cl]- | C16H22N2O6   | 373.11719                        |                  |      | 8.5E+05          | -0.7 |                  |      |                  |      |
| 187 | 5-Hydroxytryptophol glucuronide                                          | [M+Cl]- | C16H21NO7    | 374.10120                        | 3.1E+05          | 0.6  |                  |      |                  |      |                  |      |
| 188 | Pentamidine                                                              | [M+Cl]- | C19H24N4O2   | 375.15933                        | 4.4E+05          | 0.9  |                  |      |                  |      |                  |      |
| 189 | Methantheline                                                            | [M+Cl]- | C21H26NO3    | 375.16067                        | 4.4E+05          | -2.7 |                  |      |                  |      |                  |      |
| 190 | Dolichyl diphosphate                                                     | [M+Cl]- | C12H26O7P2   | 379.08478                        |                  |      |                  |      | 1.0E+06          | -2.4 |                  |      |
| 191 | Cis-zeatin-O-glucoside                                                   | [M-H]-  | C16H23N5O6   | 380.15756                        |                  |      |                  |      |                  |      | 1.1E+05          | 2.2  |
| 192 | Callytriol C                                                             | [M+Cl]- | C23H24O3     | 383.14195                        |                  |      | 4.7E+05          | -2.2 |                  |      | 2.4E+05          | 2.2  |
| 193 | 5,7,2',5'-Tetrahydroxy-3,4'-dimethoxyflavone 5'-acetate                  | [M-H]-  | C19H16O9     | 387.07216                        |                  |      |                  |      | 1.1E+06          | 0.6  |                  |      |
| 194 | (+)-N-(1S-methyl-2-hydroxy-ethyl) alpha,alpha-dimethylarachidonoyl amine | [M-H]-  | C25H43NO2    | 388.32210                        |                  |      |                  |      | 1.3E+06          | -0.1 |                  |      |
| 195 | Miraxanthin-I                                                            | [M+Cl]- | C14H18N2O7S  | 393.05287                        | 8.6E+05          | -2.5 | 1.3E+06          | -1.0 | 3.2E+06          | -2.1 |                  |      |
| 196 | Pantetheine 4'-phosphate                                                 | [M+Cl]- | C11H23N2O7PS | 393.06576                        |                  |      | 2.2E+06          | -1.7 |                  |      |                  |      |
| 197 | Triglochinin                                                             | [M+Cl]- | C14H17NO10   | 394.05465                        |                  |      | 4.1E+05          | -0.3 | 1.3E+06          | 2.1  |                  |      |
| 198 | 3-Methoxytyramine-betaxanthin                                            | [M+Cl]- | C18H20N2O6   | 395.10154                        |                  |      | 1.8E+06          | -0.1 |                  |      |                  |      |
| 199 | 3-(2,4-Cyclopentadien-1-ylidene)pregn-4-en-20-one                        | [M+Cl]- | C26H34O      | 397.23037                        |                  |      |                  |      |                  |      | 2.6E+05          | -0.5 |
| 200 | Estradiol-17-phenylpropionate                                            | [M-H]-  | C27H32O3     | 403.22787                        |                  |      |                  |      | 1.2E+06          | -1.5 |                  |      |
| 201 | 6-Hydroxyprotopine                                                       | [M+Cl]- | C20H19NO6    | 404.09064                        |                  |      |                  |      | 1.4E+06          | 2.2  |                  |      |
| 202 | Fraxin                                                                   | [M+Cl]- | C16H18O10    | 405.05940                        |                  |      | 4.7E+05          | 0.4  |                  |      | 8.6E+04          | -0.3 |
| 203 | MG(0:0/22:4(7Z,10Z,13Z,16Z)/0:0)                                         | [M-H]-  | C25H42O4     | 405.30103                        |                  |      |                  |      | 1.1E+06          | -3.0 | 2.5E+05          | -1.3 |
| 204 | Gossypetin 7-methyl ether 8-acetate                                      | [M+Cl]- | C18H14O9     | 409.03318                        |                  |      | 1.3E+06          | -0.9 |                  |      |                  |      |
| 205 | 3,5-Dihydroxy-6,7,8-trimethoxy-3',4'-methylenedioxyflavone               | [M+Cl]- | C19H16O9     | 423.04883                        |                  |      |                  |      | 1.2E+06          | -2.4 |                  |      |
| 206 | Tuberonic acid glucoside                                                 | [M+Cl]- | C18H28O9     | 423.14273                        |                  |      |                  |      |                  |      | 4.7E+04          | 0.0  |
| 207 | Acetyl adenylate                                                         | [M+Cl]- | C12H16N5O8P  | 424.04305                        |                  |      |                  |      | 8.1E+05          | -1.6 |                  |      |

Table S2: Untargeted metabolic profiling of Goji Berries hydroalcoholic extracts by ESI(-) FT-ICR MS

| #   | Putative annotation <sup>a</sup>                           | Ion     | Formula       | m/z <sub>Theo</sub> <sup>b</sup> | BL1 <sup>c</sup> | ppm  | BL2 <sup>c</sup> | ppm  | SL1 <sup>c</sup> | ppm  | SL2 <sup>c</sup> | ppm |
|-----|------------------------------------------------------------|---------|---------------|----------------------------------|------------------|------|------------------|------|------------------|------|------------------|-----|
| 208 | Coleone P                                                  | [M+Cl]- | C22H30O6      | 425.17364                        |                  |      | 8.1E+05          | 2.9  |                  |      |                  |     |
| 209 | Absciscic acid glucose ester                               | [M-H]-  | C21H30O9      | 425.18171                        | 3.3E+05          | -1.4 |                  |      |                  |      |                  |     |
| 210 | Allochenodeoxycholic acid                                  | [M+Cl]- | C24H40O4      | 427.26206                        | 4.6E+05          | 0.6  |                  |      |                  |      |                  |     |
| 211 | (5Z)-(3S)-1α,25-dihydroxy-3-deoxy-3-thiavitamin D3 3-oxide | [M-H]-  | C26H42O3S     | 433.27819                        |                  |      | 1.7E+06          | 2.4  |                  |      |                  |     |
| 212 | Flavonol 3-O-D-glycoside                                   | [M+Cl]- | C21H20O8      | 435.08522                        |                  |      |                  |      |                  |      | 4.4E+04          | 2.0 |
| 213 | PA(16:1(9Z)/0:0)                                           | [M+Cl]- | C19H37O7P     | 443.19709                        |                  |      |                  |      |                  |      | 7.2E+04          | 2.2 |
| 214 | Mycolipenic acid (C27)                                     | [M+Cl]- | C27H52O2      | 443.36613                        |                  |      |                  |      | 1.3E+06          | 0.7  |                  |     |
| 215 | dIDP                                                       | [M+Cl]- | C10H14N4O10P2 | 446.98792                        |                  |      | 4.6E+05          | -2.8 |                  |      |                  |     |
| 216 | 1D-myo-Inositol 1,3,4-trisphosphate                        | [M+Cl]- | C6H15O15P3    | 454.93178                        |                  |      | 8.3E+05          | 0.7  |                  |      |                  |     |
| 217 | Enantiomultijugin                                          | [M+Cl]- | C24H22O7      | 457.10595                        |                  |      | 2.2E+06          | 0.4  |                  |      |                  |     |
| 218 | DHAP(18:0e)                                                | [M+Cl]- | C21H43O6P     | 457.24913                        | 4.3E+05          | -0.1 |                  |      |                  |      |                  |     |
| 219 | Staurosporine                                              | [M-H]-  | C28H26N4O3    | 465.19321                        |                  |      |                  |      | 7.6E+05          | 0.9  |                  |     |
| 220 | Cephaeline                                                 | [M-H]-  | C28H38N2O4    | 465.27588                        |                  |      |                  |      | 1.8E+06          | -0.5 |                  |     |
| 221 | Dichamanetin                                               | [M-H]-  | C29H24O6      | 467.15001                        |                  |      |                  |      | 8.0E+05          | 1.2  |                  |     |
| 222 | Marchantin A                                               | [M+Cl]- | C28H24O5      | 475.13178                        |                  |      | 6.6E+05          | -1.9 | 7.6E+05          | 1.8  |                  |     |
| 223 | (24R)-24-Methylcycloarta-25-en-3-β-ol                      | [M+Cl]- | C31H52O       | 475.37122                        |                  |      |                  |      | 1.3E+06          | 1.6  |                  |     |
| 224 | CTP                                                        | [M-H]-  | C9H16N3O14P3  | 481.97724                        |                  |      |                  |      | 2.2E+06          | -0.9 |                  |     |
| 225 | PA(P-20:0/0:0)                                             | [M+Cl]- | C23H47O6P     | 485.28043                        | 3.7E+05          | -1.0 |                  |      | 1.8E+06          | -1.4 |                  |     |
| 226 | Cyanidin 3-(4"-acetylglucoside)                            | [M-H]-  | C23H23O12     | 490.11167                        | 3.8E+05          | 0.1  | 3.5E+06          | 2.2  |                  |      |                  |     |
| 227 | 5,10-Methenyltetrahydrofolic acid                          | [M+Cl]- | C20H21N7O6    | 490.12473                        |                  |      | 1.8E+06          | -3.0 |                  |      |                  |     |
| 228 | 20-Hydroxy-leukotriene E4                                  | [M+Cl]- | C23H37NO6S    | 490.20356                        | 1.4E+06          | -2.2 |                  |      |                  |      |                  |     |
| 229 | (+)-3β-Hydroxy-ursan-28-oic acid                           | [M+Cl]- | C30H50O3      | 493.34540                        |                  |      |                  |      | 7.6E+05          | -2.3 |                  |     |
| 230 | 7-Methylthioheptyl glucosinolate                           | [M+Cl]- | C15H29NO9S3   | 498.06985                        |                  |      |                  |      | 8.6E+05          | -2.2 |                  |     |
| 231 | N-Acetyl-O-demethylpuromycin                               | [M-H]-  | C23H29N7O6    | 498.21066                        | 6.2E+05          | -2.3 |                  |      |                  |      |                  |     |
| 232 | Quercetin 3-galactoside                                    | [M+Cl]- | C21H20O12     | 499.06488                        |                  |      | 5.0E+05          | 3.0  |                  |      |                  |     |



Table S2: Untargeted metabolic profiling of Goji Berries hydroalcoholic extracts by ESI(-) FT-ICR MS

| #   | Putative annotation <sup>a</sup>                                                    | Ion                 | Formula       | m/z <sub>Theo</sub> <sup>b</sup> | BL1 <sup>c</sup> | ppm  | BL2 <sup>c</sup> | ppm  | SL1 <sup>c</sup> | ppm  | SL2 <sup>c</sup> | ppm  |
|-----|-------------------------------------------------------------------------------------|---------------------|---------------|----------------------------------|------------------|------|------------------|------|------------------|------|------------------|------|
|     | 1-(2-Hydroxy-3,4,5,6-tetramethoxyphenyl)-3-(2,3,4,6-tetramethoxyphenyl)-2-propen-1- |                     |               |                                  |                  |      |                  |      |                  |      |                  |      |
| 233 | one                                                                                 | [M+Cl] <sup>-</sup> | C23H28O10     | 499.13765                        | 5.4E+05          | 0.1  |                  |      |                  |      |                  |      |
| 234 | Cromolyn                                                                            | [M+Cl] <sup>-</sup> | C23H16O11     | 503.03866                        | 4.1E+05          | -2.1 |                  |      |                  |      |                  |      |
| 235 | Arachidonyl carnitine                                                               | [M-H] <sup>-</sup>  | C31H54NO4     | 503.39801                        |                  |      | 3.9E+05          | -1.5 |                  |      | 1.4E+05          | -1.0 |
| 236 | Emetamine                                                                           | [M+Cl] <sup>-</sup> | C29H36N2O4    | 511.23691                        |                  |      | 1.2E+06          | 2.7  |                  |      |                  |      |
| 237 | Isorhamnetin 7- $\alpha$ -D-Glucosamine [Flavones and Flavonols]                    | [M+Cl] <sup>-</sup> | C22H23NO11    | 512.09651                        |                  |      | 7.0E+05          | -2.1 |                  |      |                  |      |
| 238 | PS(15:1(9Z)/0:0)                                                                    | [M+Cl] <sup>-</sup> | C21H40NO9P    | 516.21347                        | 3.9E+05          | 2.2  |                  |      |                  |      |                  |      |
| 239 | N-Acetyl-leukotriene E4                                                             | [M+Cl] <sup>-</sup> | C25H39NO6S    | 516.21921                        |                  |      |                  |      |                  |      | 8.5E+04          | -2.4 |
| 240 | Glucosylgalactosyl hydroxylysine                                                    | [M+Cl] <sup>-</sup> | C18H34N2O13   | 521.17549                        |                  |      | 1.1E+06          | 1.4  |                  |      |                  |      |
| 241 | Mascaroside                                                                         | [M-H] <sup>-</sup>  | C26H36O11     | 523.21849                        |                  |      |                  |      | 1.3E+06          | 2.8  |                  |      |
| 242 | 2',4',6',3,4-Pentahydroxy-3'-geranyl-5-prenyldihydrochalcone                        | [M+Cl] <sup>-</sup> | C30H38O6      | 529.23624                        |                  |      |                  |      | 8.1E+05          | -0.3 | 9.3E+04          | -2.9 |
| 243 | PI(13:0/0:0)                                                                        | [M-H] <sup>-</sup>  | C22H43O12P    | 529.24194                        |                  |      |                  |      | 7.8E+05          | -1.7 |                  |      |
| 244 | 35-aminobacteriohopane-32,33,34-triol                                               | [M-H] <sup>-</sup>  | C35H63NO3     | 544.47352                        | 4.4E+05          | -0.5 |                  |      |                  |      |                  |      |
| 245 | Decoside                                                                            | [M-H] <sup>-</sup>  | C30H42O9      | 545.27561                        | 5.1E+05          | 0.0  |                  |      |                  |      |                  |      |
| 246 | all-trans-retinyl linolate                                                          | [M-H] <sup>-</sup>  | C38H58O2      | 545.43640                        | 5.4E+05          | 2.8  |                  |      |                  |      |                  |      |
| 247 | Mycalamide B                                                                        | [M+Cl] <sup>-</sup> | C25H43NO10    | 552.25810                        |                  |      |                  |      | 1.3E+06          | 0.6  |                  |      |
| 248 | PG(10:0/10:0)                                                                       | [M-H] <sup>-</sup>  | C26H51O10P    | 553.31471                        |                  |      |                  |      | 1.1E+06          | 2.2  | 5.5E+04          | -2.9 |
| 249 | 6,8a-Seco-6,8a-deoxy-5-oxoavermectin "1b" aglycone                                  | [M-H] <sup>-</sup>  | C33H46O7      | 553.31708                        |                  |      |                  |      | 1.1E+06          | -1.1 |                  |      |
| 250 | Desmosine                                                                           | [M+Cl] <sup>-</sup> | C24H40N5O8    | 561.25709                        | 3.4E+05          | 0.0  |                  |      |                  |      |                  |      |
| 251 | DG(14:0/15:0/0:0)                                                                   | [M+Cl] <sup>-</sup> | C32H62O5      | 561.42913                        |                  |      | 3.8E+05          | -1.5 |                  |      |                  |      |
| 252 | UDP-3-ketoglucose                                                                   | [M-H] <sup>-</sup>  | C15H22N2O17P2 | 563.03209                        |                  |      |                  |      | 2.0E+06          | -1.4 |                  |      |
| 253 | PG(22:2(13Z,16Z)/0:0)                                                               | [M-H] <sup>-</sup>  | C28H53O9P     | 563.33544                        |                  |      |                  |      | 2.0E+06          | 1.1  |                  |      |
| 254 | PA(12:0/14:0)                                                                       | [M-H] <sup>-</sup>  | C29H57O8P     | 563.37183                        |                  |      |                  |      | 1.9E+06          | -2.9 |                  |      |
| 255 | 2-Octaprenyl-3-methyl-6-methoxy-1,4-benzoquinol                                     | [M-H] <sup>-</sup>  | C38H60O3      | 563.44697                        |                  |      |                  |      | 1.9E+06          | -2.4 |                  |      |
| 256 | DG(14:0/18:2(9Z,12Z)/0:0)                                                           | [M-H] <sup>-</sup>  | C35H64O5      | 563.46810                        |                  |      |                  |      | 2.6E+06          | -0.6 |                  |      |
| 257 | LysoPE(0:0/22:4(7Z,10Z,13Z,16Z))                                                    | [M+Cl] <sup>-</sup> | C27H48NO7P    | 564.28624                        |                  |      |                  |      | 2.1E+06          | 0.7  |                  |      |

Table S2: Untargeted metabolic profiling of Goji Berries hydroalcoholic extracts by ESI(-) FT-ICR MS

| #   | Putative annotation <sup>a</sup>                                 | Ion     | Formula       | m/z <sub>Theo</sub> <sup>b</sup> | BL1 <sup>c</sup> | ppm  | BL2 <sup>c</sup> | ppm  | SL1 <sup>c</sup> | ppm  | SL2 <sup>c</sup> | ppm  |
|-----|------------------------------------------------------------------|---------|---------------|----------------------------------|------------------|------|------------------|------|------------------|------|------------------|------|
| 258 | 4,5-Dihydro-4-hydroxy-5-S-glutathionyl-benzo[a]pyrene            | [M-H]-  | C30H29N3O7S   | 574.16534                        | 8.2E+05          | 2.4  |                  |      |                  |      | 3.1E+04          | -0.8 |
| 259 | Myricetin 3-(2'',3'',4''-triacytylxyloside)                      | [M-H]-  | C26H24O15     | 575.10424                        | 3.8E+05          | -1.8 |                  |      |                  |      |                  |      |
| 260 | Afrormosin 7-O-(6''-malonylglucoside)                            | [M+Cl]- | C26H26O13     | 581.10674                        |                  |      | 6.4E+05          | -0.9 |                  |      |                  |      |
| 261 | SQMG(0:0/16:1(11Z))                                              | [M+Cl]- | C25H45O11S    | 588.23766                        | 6.1E+05          | 2.4  |                  |      |                  |      |                  |      |
| 262 | UDP-2-acetamido-4-amino-2,4,6-trideoxyglucose                    | [M-H]-  | C17H28N4O15P2 | 589.09536                        | 4.6E+05          | -1.0 |                  |      |                  |      |                  |      |
| 263 | Osthenol-7-O-beta-D-gentiobioside                                | [M+Cl]- | C26H34O13     | 589.16934                        | 3.8E+05          | -2.6 |                  |      |                  |      |                  |      |
| 264 | 4-Keto-4'-hydroxyalloxanthin                                     | [M-H]-  | C40H50O4      | 593.36363                        |                  |      |                  |      | 7.6E+05          | -2.9 |                  |      |
| 265 | Herbacetin 8-(2'',3'',4''-triacytylxyloside)                     | [M+Cl]- | C26H24O14     | 595.08601                        |                  |      | 4.0E+05          | -3.0 |                  |      |                  |      |
| 266 | 5,7,2',5'-Tetrahydroxyflavanone 7-O-rutinoside                   | [M-H]-  | C27H32O15     | 595.16684                        |                  |      | 3.4E+05          | -2.7 |                  |      |                  |      |
| 267 | 1-(15-methyl-tridecanyl)-2-(8-[3]-ladderane-octanyl)-sn-glycerol | [M+Cl]- | C37H68O3      | 595.48625                        | 3.3E+05          | -0.3 |                  |      |                  |      |                  |      |
| 268 | Trilobine                                                        | [M+Cl]- | C35H34N2O5    | 597.21617                        |                  |      | 3.8E+05          | -2.1 |                  |      |                  |      |
| 269 | PE(12:0/14:1(9Z))                                                | [M-H]-  | C31H60NO8P    | 604.39838                        | 4.2E+05          | -2.0 |                  |      |                  |      |                  |      |
| 270 | 1D-myo-Inositol 1,3,4,5,6-pentakisphosphate                      | [M+Cl]- | C6H17O21P5    | 614.86444                        |                  |      |                  |      | 2.5E+06          | -2.3 |                  |      |
| 271 | PS(12:0/12:0)                                                    | [M+Cl]- | C30H58NO10P   | 658.34924                        |                  |      |                  |      | 1.5E+06          | -1.2 |                  |      |
| 272 | PA(12:0/20:2(11Z,14Z))                                           | [M+Cl]- | C35H65O8P     | 679.41111                        |                  |      |                  |      | 1.8E+06          | 2.6  |                  |      |
| 273 | Abrusoside A                                                     | [M+Cl]- | C36H54O10     | 681.34110                        |                  |      |                  |      | 3.2E+06          | -2.5 |                  |      |
| 274 | Chitin                                                           | [M-H]-  | C28H49N3O16   | 682.30401                        |                  |      |                  |      | 9.5E+05          | -0.2 |                  |      |
| 275 | Gomphrenin-V                                                     | [M-H]-  | C34H34N2O16   | 725.18356                        | 3.3E+05          | 1.0  |                  |      |                  |      |                  |      |
| 276 | Anhydroicaritin 3,7-diglucoside                                  | [M+Cl]- | C33H40O16     | 727.20104                        |                  |      |                  |      | 6.9E+05          | -2.0 |                  |      |
| 277 | PA(14:0/22:6(4Z,7Z,10Z,13Z,16Z,19Z))                             | [M+Cl]- | C39H65O8P     | 727.41111                        | 6.0E+05          | 2.8  |                  |      |                  |      |                  |      |
| 278 | PG(12:0/21:0)                                                    | [M-H]-  | C39H77O10P    | 735.51816                        |                  |      |                  |      | 3.5E+06          | 1.6  |                  |      |
| 279 | Bilirubin glucuronide                                            | [M-H]-  | C39H44N4O12   | 759.28830                        | 1.1E+06          | 2.6  |                  |      |                  |      |                  |      |
| 280 | PE(16:1(9Z)/22:6(4Z,7Z,10Z,13Z,16Z,19Z))                         | [M-H]-  | C43H72NO8P    | 760.49228                        | 7.6E+05          | -1.5 |                  |      |                  |      |                  |      |
| 281 | PS(P-18:0/17:2(9Z,12Z))                                          | [M+Cl]- | C41H76NO9P    | 792.49517                        |                  |      | 3.1E+05          | 2.1  |                  |      |                  |      |
| 282 | PA(19:1(9Z)/22:4(7Z,10Z,13Z,16Z))                                | [M+Cl]- | C44H77O8P     | 799.50501                        |                  |      |                  |      | 9.7E+05          | -2.1 |                  |      |
| 283 | PS(15:0/20:5(5Z,8Z,11Z,14Z,17Z))                                 | [M+Cl]- | C41H70NO10P   | 802.44314                        |                  |      |                  |      | 6.0E+05          | -0.8 |                  |      |

Table S2: Untargeted metabolic profiling of Goji Berries hydroalcoholic extracts by ESI(-) FT-ICR MS

| #   | Putative annotation <sup>a</sup>          | Ion     | Formula                                                                         | m/z <sub>Theo</sub> <sup>b</sup> | BL1 <sup>c</sup> | ppm  | BL2 <sup>c</sup> | ppm | SL1 <sup>c</sup> | ppm | SL2 <sup>c</sup> | ppm |
|-----|-------------------------------------------|---------|---------------------------------------------------------------------------------|----------------------------------|------------------|------|------------------|-----|------------------|-----|------------------|-----|
| 284 | 2-Methylbut-2-enoyl-CoA                   | [M-H]-  | C <sub>26</sub> H <sub>42</sub> N <sub>7</sub> O <sub>17</sub> P <sub>3</sub> S | 848.14980                        |                  |      |                  |     | 9.2E+05          |     | -2.9             |     |
| 285 | PGP(16:1(9Z)/22:6(4Z,7Z,10Z,13Z,16Z,19Z)) | [M-H]-  | C <sub>44</sub> H <sub>74</sub> O <sub>13</sub> P <sub>2</sub>                  | 871.45319                        |                  |      |                  |     | 5.6E+05          |     | -2.6             |     |
| 286 | Deltonin                                  | [M-H]-  | C <sub>45</sub> H <sub>72</sub> O <sub>17</sub>                                 | 883.46967                        |                  |      |                  |     | 8.4E+05          |     | -2.2             |     |
| 287 | PI(20:0/22:6(4Z,7Z,10Z,13Z,16Z,19Z))      | [M-H]-  | C <sub>51</sub> H <sub>87</sub> O <sub>13</sub> P                               | 937.58115                        | 5.4E+05          | 0.5  |                  |     |                  |     |                  |     |
| 288 | TG(16:0/17:0/22:0)                        | [M+Cl]- | C <sub>58</sub> H <sub>112</sub> O <sub>6</sub>                                 | 939.81529                        | 3.5E+05          | -0.3 |                  |     |                  |     |                  |     |
| 289 | TG(16:0/20:0/22:1(13Z))                   | [M+Cl]- | C <sub>61</sub> H <sub>116</sub> O <sub>6</sub>                                 | 979.84659                        |                  |      |                  |     | 1.9E+06          |     | 1.4              |     |

<sup>a</sup> MG Monoacylglycerol; DG Diacylglycerol; TG Triacylglycerol; GalCer Galactosylceramide; PA Phosphatidic acid; PC Phosphatidylcholine; PE Phosphatidylethanolamine; PG Glycerophospholipids; PI Phosphatidylinositol; PS Phosphatidylserine; SQMG Glycosylmonoacylglycerols; DHAP Dihydroxyacetone phosphate; DNP Dinitrophenyl

<sup>b</sup> Theoretical m/z

<sup>c</sup> BL1 and BL2 stand for Big Lifeberry harvested in August and October, respectively; SL1 and SL2 stand for Sweet Lifeberry harvested in August and October, respectively.

Table S3: Untargeted metabolic profiling of Goji Berries organic extracts by ESI(+) Ion Trap MS<sup>a</sup>

| #  | m/z   | Putative Annotation <sup>b</sup> | Formula   | Ion                 | BL1 <sup>c</sup> | BL2 <sup>c</sup> | SL1 <sup>c</sup> | SL2 <sup>c</sup> |
|----|-------|----------------------------------|-----------|---------------------|------------------|------------------|------------------|------------------|
| 1  | 129.9 | Pyroglutamic acid                | C5H7NO3   | [M+H] <sup>+</sup>  |                  | 1.9E+03          |                  |                  |
| 2  | 131.9 | Leucine                          | C6H13NO2  | [M+H] <sup>+</sup>  |                  | 6.6E+03          |                  | 2.8E+04          |
| 3  | 132.9 | Ornithine                        | C5H12N2O2 | [M+H] <sup>+</sup>  |                  | 2.0E+03          |                  |                  |
| 4  | 138.9 | Nicotinamide N-oxide             | C6H6N2O2  | [M+H] <sup>+</sup>  |                  | 5.3E+03          |                  | 1.3E+04          |
| 5  | 146.7 | Lysine                           | C6H14N2O2 | [M+H] <sup>+</sup>  | 1.3E+04          |                  |                  |                  |
| 6  | 148.8 | Cinnamic acid                    | C9H8O2    | [M+H] <sup>+</sup>  |                  | 1.6E+03          |                  |                  |
| 7  | 162.9 | Nicotine                         | C10H14N2  | [M+H] <sup>+</sup>  |                  | 4.2E+03          |                  |                  |
| 8  | 172.8 | Glycylproline                    | C7H12N2O3 | [M+H] <sup>+</sup>  | 1.7E+04          | 2.7E+03          |                  | 9.6E+03          |
| 9  | 174.9 | Arginine                         | C6H14N4O2 | [M+H] <sup>+</sup>  | 1.3E+04          | 4.7E+03          |                  |                  |
| 10 | 188.9 | Monomethyl-arginine              | C7H16N4O2 | [M+H] <sup>+</sup>  |                  | 2.7E+03          |                  |                  |
| 11 | 202.8 | Aldohexose                       | C6H12O6   | [M+Na] <sup>+</sup> | 1.9E+04          | 3.0E+03          |                  | 1.2E+04          |
| 12 | 209.8 | Butenyl-methyl-threonine         | C9H17NO3  | [M+Na] <sup>+</sup> |                  | 2.0E+03          | 1.2E+04          |                  |
| 13 | 211.0 | Azelaic acid                     | C9H16O4   | [M+Na] <sup>+</sup> |                  | 2.5E+03          |                  |                  |
| 14 | 214.9 | Methyl lauric acid               | C13H26O2  | [M+H] <sup>+</sup>  |                  | 1.6E+03          |                  |                  |
| 15 | 218.9 | Aldohexose                       | C6H12O6   | [M+K] <sup>+</sup>  | 1.7E+04          | 3.1E+03          |                  |                  |
| 16 | 256.9 | Palmitic acid                    | C16H32O2  | [M+H] <sup>+</sup>  |                  |                  | 1.1E+04          |                  |
| 17 | 260.9 | Apiole                           | C12H14O4  | [M+K] <sup>+</sup>  |                  |                  | 2.1E+04          | 9.9E+03          |
| 18 | 276.9 | Chrysanthetriol                  | C15H26O3  | [M+H] <sup>+</sup>  | 2.4E+04          |                  |                  |                  |
| 19 | 278.9 | Linolenic acid                   | C18H30O2  | [M+H] <sup>+</sup>  | 2.1E+04          |                  |                  |                  |
| 20 | 284.1 | Acrifoline                       | C16H23NO2 | [M+Na] <sup>+</sup> |                  |                  |                  | 1.1E+04          |
| 21 | 292.9 | Methyl palmitic acid             | C17H34O2  | [M+Na] <sup>+</sup> | 1.8E+04          |                  |                  |                  |
| 22 | 300.9 | Methyl-hexadecanedioic acid      | C17H32O4  | [M+H] <sup>+</sup>  |                  |                  |                  | 1.4E+04          |
| 23 | 303.0 | Linoleic acid                    | C18H32O2  | [M+Na] <sup>+</sup> | 2.1E+04          |                  |                  |                  |
| 24 | 305.0 | Arachidonic acid                 | C20H32O2  | [M+H] <sup>+</sup>  | 3.1E+04          |                  | 2.8E+04          | 1.5E+04          |
| 25 | 321.0 | Phytanol                         | C20H42O   | [M+Na] <sup>+</sup> | 1.7E+04          |                  |                  | 1.2E+04          |
| 26 | 337.0 | Trimethoxyflavanone              | C18H18O5  | [M+Na] <sup>+</sup> |                  |                  | 1.9E+04          |                  |

Table S3: Untargeted metabolic profiling of Goji Berries organic extracts by ESI(+) Ion Trap MS<sup>a</sup>

| #  | m/z   | Putative Annotation <sup>b</sup> | Formula   | Ion                 | BL1 <sup>c</sup> | BL2 <sup>c</sup> | SL1 <sup>c</sup> | SL2 <sup>c</sup> |
|----|-------|----------------------------------|-----------|---------------------|------------------|------------------|------------------|------------------|
| 27 | 339.0 | Docosenoic acid                  | C22H42O2  | [M+H] <sup>+</sup>  |                  |                  |                  | 1.2E+04          |
| 28 | 343.0 | Phaseollidin hydrate             | C20H22O5  | [M+H] <sup>+</sup>  | 2.2E+04          |                  |                  | 1.3E+04          |
| 29 | 349.0 | Methyl-eicosanoic acid           | C21H42O2  | [M+Na] <sup>+</sup> | 1.8E+04          |                  | 3.2E+04          | 1.6E+04          |
| 30 | 353.0 | Octadecanedioic acid             | C18H34O4  | [M+K] <sup>+</sup>  | 2.6E+04          |                  |                  | 1.7E+04          |
| 31 | 357.0 | Docosatrienoic acid              | C22H38O2  | [M+Na] <sup>+</sup> |                  | 9.6E+03          |                  |                  |
| 32 | 361.2 | Docosenoic acid                  | C22H42O2  | [M+Na] <sup>+</sup> |                  |                  |                  | 1.5E+04          |
| 33 | 365.0 | Eicosanedioic acid               | C20H38O4  | [M+Na] <sup>+</sup> | 5.0E+04          | 1.9E+04          | 6.2E+04          | 5.5E+04          |
| 34 | 367.1 | Hydroxydocosahexaenoic acid      | C22H32O3  | [M+Na] <sup>+</sup> |                  |                  |                  | 1.4E+04          |
| 35 | 369.0 | Dimethyl-docosanoic acid         | C24H48O2  | [M+H] <sup>+</sup>  | 2.3E+04          |                  |                  | 1.3E+04          |
| 36 | 371.0 | Docosanedioic acid               | C22H42O4  | [M+H] <sup>+</sup>  | 2.7E+04          | 1.2E+04          |                  | 1.5E+04          |
| 37 | 381.0 | MG(0:0/18:0/0:0)                 | C21H42O4  | [M+Na] <sup>+</sup> | 2.4E+04          | 1.2E+04          | 2.4E+04          | 2.0E+04          |
| 38 | 385.1 | Cholecalciferol                  | C27H44O   | [M+H] <sup>+</sup>  | 2.7E+04          | 1.4E+04          | 2.1E+04          | 1.5E+04          |
| 39 | 393.1 | Docosanedioic acid               | C22H42O4  | [M+Na] <sup>+</sup> | 4.5E+04          | 1.3E+04          | 4.7E+04          | 3.1E+04          |
| 40 | 395.1 | Hexacosenoic acid                | C26H50O2  | [M+H] <sup>+</sup>  |                  |                  |                  | 1.2E+04          |
| 41 | 399.1 | Methylvitamin D3                 | C28H46O   | [M+H] <sup>+</sup>  | 2.0E+04          |                  |                  | 1.2E+04          |
| 42 | 407.0 | Hexacosahexaenoic acid           | C26H40O2  | [M+Na] <sup>+</sup> |                  |                  |                  | 1.4E+04          |
| 43 | 409.1 | Hydroxychalcone-glucoside        | C21H22O7  | [M+Na] <sup>+</sup> | 3.0E+04          | 1.4E+04          | 3.6E+04          | 2.2E+04          |
| 44 | 413.1 | MG(0:0/22:1/0:0)                 | C25H48O4  | [M+H] <sup>+</sup>  | 5.6E+04          | 2.6E+04          | 6.3E+04          | 5.0E+04          |
| 45 | 415.1 | Tetrahydroxy-trimethoxyflavone   | C18H16O9  | [M+K] <sup>+</sup>  |                  |                  |                  | 1.2E+04          |
| 46 | 421.1 | Methylvitamin D3                 | C28H46O   | [M+Na] <sup>+</sup> |                  |                  | 2.1E+04          | 1.9E+04          |
| 47 | 423.1 | Octacosenoic acid                | C28H54O2  | [M+H] <sup>+</sup>  |                  |                  |                  | 1.3E+04          |
| 48 | 425.2 | Octacosanoic acid                | C28H56O2  | [M+H] <sup>+</sup>  |                  | 9.4E+03          |                  | 1.3E+04          |
| 49 | 428.2 | Stearoylcarnitine                | C25H49NO4 | [M+H] <sup>+</sup>  | 2.9E+04          | 1.2E+04          | 2.1E+04          | 1.9E+04          |
| 50 | 429.1 | Dihydroxynoroxavitamin D3        | C25H42O4  | [M+Na] <sup>+</sup> | 4.2E+04          | 2.3E+04          | 4.4E+04          | 3.2E+04          |
| 51 | 431.2 | Ginkgolide A                     | C20H24O9  | [M+Na] <sup>+</sup> | 1.8E+04          |                  |                  | 1.6E+04          |
| 52 | 433.1 | Hexacosenoic acid                | C26H50O2  | [M+K] <sup>+</sup>  | 3.2E+04          |                  | 4.2E+04          |                  |

Table S3: Untargeted metabolic profiling of Goji Berries organic extracts by ESI(+) Ion Trap MS<sup>a</sup>

| #  | m/z   | Putative Annotation <sup>b</sup>               | Formula  | Ion                 | BL1 <sup>c</sup> | BL2 <sup>c</sup> | SL1 <sup>c</sup> | SL2 <sup>c</sup> |
|----|-------|------------------------------------------------|----------|---------------------|------------------|------------------|------------------|------------------|
| 53 | 437.1 | Tridecyl oleate                                | C29H56O2 | [M+H] <sup>+</sup>  | 3.5E+04          | 1.1E+04          | 5.4E+04          | 2.6E+04          |
| 54 | 439.1 | Beta-tocopherol                                | C28H48O2 | [M+Na] <sup>+</sup> |                  |                  |                  | 1.2E+04          |
| 55 | 441.1 | apo-Carotenol                                  | C30H42O  | [M+Na] <sup>+</sup> | 2.2E+04          | 1.3E+04          | 2.7E+04          | 2.2E+04          |
| 56 | 443.1 | Scillirosidin                                  | C26H34O6 | [M+H] <sup>+</sup>  | 1.9E+04          |                  | 2.3E+04          | 1.6E+04          |
| 57 | 445.2 | Dihydroxynoroxavitamin D3                      | C25H42O4 | [M+K] <sup>+</sup>  |                  | 1.1E+04          | 2.4E+04          | 1.4E+04          |
| 58 | 447.1 | Alpha-Tocotrienol                              | C29H44O2 | [M+Na] <sup>+</sup> |                  |                  | 2.1E+04          | 1.3E+04          |
| 59 | 449.2 | Hexacosanedioic acid                           | C26H50O4 | [M+Na] <sup>+</sup> | 2.9E+04          | 1.3E+04          | 2.2E+04          | 1.9E+04          |
| 60 | 451.1 | Myristyl oleate                                | C30H58O2 | [M+H] <sup>+</sup>  |                  |                  | 2.1E+04          |                  |
| 61 | 453.1 | Alpha-Tocopherol                               | C29H50O2 | [M+Na] <sup>+</sup> | 2.2E+04          | 1.2E+04          | 4.1E+04          | 1.9E+04          |
| 62 | 455.1 | Hydroxy-gama-tocopherol                        | C28H48O3 | [M+Na] <sup>+</sup> |                  |                  | 2.6E+04          | 1.2E+04          |
| 63 | 457.2 | Trihydroxy-dihydrovitamin D3                   | C27H46O4 | [M+Na] <sup>+</sup> |                  | 1.0E+04          | 2.7E+04          | 1.7E+04          |
| 64 | 459.2 | Tetramethy-tetracosadienoic acid               | C28H52O2 | [M+K] <sup>+</sup>  |                  |                  | 2.0E+04          |                  |
| 65 | 465.1 | MG(24:0/0:0/0:0)                               | C27H54O4 | [M+Na] <sup>+</sup> | 1.8E+04          |                  | 2.5E+04          | 1.7E+04          |
| 66 | 467.1 | Triacontatetraenoic acid                       | C30H52O2 | [M+Na] <sup>+</sup> |                  |                  | 2.4E+04          |                  |
| 67 | 469.1 | Hydroxy-tocopherol                             | C29H50O3 | [M+Na] <sup>+</sup> |                  |                  | 2.0E+04          | 1.3E+04          |
| 68 | 471.1 | Chlorogenin                                    | C28H48O4 | [M+Na] <sup>+</sup> |                  |                  | 2.0E+04          |                  |
| 69 | 473.2 | Trihydroxy-cholestanoic acid                   | C27H46O5 | [M+Na] <sup>+</sup> | 2.5E+04          | 1.5E+04          | 4.3E+04          | 3.1E+04          |
| 70 | 475.1 | Dihydroxy-dimethylhexadehydro-homovitamin D3   | C30H44O3 | [M+Na] <sup>+</sup> |                  |                  | 2.3E+04          | 1.5E+04          |
| 71 | 477.2 | Dihydroxy-dimethyl-tetradehydro-homovitamin D3 | C30H46O3 | [M+Na] <sup>+</sup> |                  |                  | 2.3E+04          |                  |
| 72 | 479.1 | Palmityl oleate                                | C32H62O2 | [M+H] <sup>+</sup>  |                  |                  | 2.6E+04          | 1.3E+04          |
| 73 | 481.1 | Hexadecyl hexadecanoate                        | C32H64O2 | [M+H] <sup>+</sup>  | 2.3E+04          | 1.4E+04          | 6.3E+04          | 2.2E+04          |
| 74 | 483.1 | Myrrhanol A                                    | C30H52O3 | [M+Na] <sup>+</sup> |                  |                  | 2.0E+04          |                  |
| 75 | 485.2 | Dehydroecdysone                                | C27H42O6 | [M+Na] <sup>+</sup> |                  |                  | 2.0E+04          |                  |
| 76 | 487.1 | Trihydroxycoprostanic acid                     | C28H48O5 | [M+Na] <sup>+</sup> | 2.0E+04          | 1.1E+04          | 3.4E+04          | 1.6E+04          |
| 77 | 489.2 | Tetrahydroxy-cholestanoic acid                 | C27H46O6 | [M+Na] <sup>+</sup> | 1.7E+04          | 1.4E+04          | 3.9E+04          | 1.7E+04          |
| 78 | 491.2 | (Hydroxy-propynyl)-didehydrovitamin D3         | C30H44O4 | [M+Na] <sup>+</sup> |                  |                  | 2.2E+04          |                  |

Table S3: Untargeted metabolic profiling of Goji Berries organic extracts by ESI(+) Ion Trap MS<sup>a</sup>

| #   | m/z   | Putative Annotation <sup>b</sup>         | Formula    | Ion                 | BL1 <sup>c</sup> | BL2 <sup>c</sup> | SL1 <sup>c</sup> | SL2 <sup>c</sup> |
|-----|-------|------------------------------------------|------------|---------------------|------------------|------------------|------------------|------------------|
| 79  | 493.2 | (Carboxylpropyl)vitamin D3               | C31H50O3   | [M+Na] <sup>+</sup> | 1.8E+04          | 9.5E+03          | 3.3E+04          | 1.6E+04          |
| 80  | 495.2 | Dihydroxy-dimethyl-dihomovitamin D3      | C31H52O3   | [M+Na] <sup>+</sup> |                  | 1.0E+04          | 3.0E+04          | 1.4E+04          |
| 81  | 497.1 | PG(17:1/0:0)                             | C23H45O9P  | [M+H] <sup>+</sup>  | 1.8E+04          | 1.1E+04          | 4.7E+04          | 2.2E+04          |
| 82  | 501.2 | Dihydroxy-(hydroxypropoxy)-norvitamin D3 | C29H50O5   | [M+Na] <sup>+</sup> | 2.0E+04          | 1.1E+04          | 3.2E+04          | 1.5E+04          |
| 83  | 503.2 | epi-Brassinolide                         | C28H48O6   | [M+Na] <sup>+</sup> | 2.0E+04          | 1.3E+04          | 2.9E+04          | 1.8E+04          |
| 84  | 505.2 | Triacantanedioic acid                    | C30H58O4   | [M+Na] <sup>+</sup> |                  | 1.1E+04          | 3.3E+04          | 1.5E+04          |
| 85  | 507.2 | Stearyl oleate                           | C34H66O2   | [M+H] <sup>+</sup>  |                  |                  | 2.1E+04          | 1.2E+04          |
| 86  | 509.1 | Diethyl-dihydroxy-methano-oxavitamin D3  | C31H50O4   | [M+Na] <sup>+</sup> | 2.0E+04          | 2.5E+04          | 5.1E+04          | 2.4E+04          |
| 87  | 511.1 | PG(18:1(9Z)/0:0)                         | C24H47O9P  | [M+H] <sup>+</sup>  |                  |                  | 2.3E+04          | 1.2E+04          |
| 88  | 513.2 | Dihydroxy-(hydroxypropoxy)vitamin D3     | C30H50O5   | [M+Na] <sup>+</sup> |                  |                  | 2.1E+04          | 1.2E+04          |
| 89  | 515.2 | Dihydroxy-phenylvitamin D3               | C33H48O3   | [M+Na] <sup>+</sup> |                  | 1.1E+04          | 2.0E+04          | 1.1E+04          |
| 90  | 517.2 | Makisterone A                            | C28H46O7   | [M+Na] <sup>+</sup> | 2.3E+04          | 1.6E+04          | 1.1E+05          | 3.1E+04          |
| 91  | 518.2 | PC(O-16:0/O-1:0)                         | C25H54NO6P | [M+Na] <sup>+</sup> |                  |                  | 4.1E+04          | 1.3E+04          |
| 92  | 519.2 | epi-Brassinolide                         | C28H48O6   | [M+K] <sup>+</sup>  |                  | 9.9E+03          | 9.8E+04          | 2.1E+04          |
| 93  | 521.2 | Tetratriacontapentaenoic acid            | C34H58O2   | [M+Na] <sup>+</sup> |                  | 1.0E+04          | 3.2E+04          | 1.8E+04          |
| 94  | 523.2 | Tetratriacontatetraenoic acid            | C34H60O2   | [M+Na] <sup>+</sup> |                  | 1.2E+04          | 2.7E+04          | 1.2E+04          |
| 95  | 525.1 | PG(19:1/0:0)                             | C25H49O9P  | [M+H] <sup>+</sup>  | 1.8E+04          | 2.0E+04          | 5.2E+04          | 2.6E+04          |
| 96  | 527.2 | PG(19:0/0:0)                             | C25H51O9P  | [M+H] <sup>+</sup>  |                  |                  | 2.2E+04          |                  |
| 97  | 529.2 | Hydroxy-norgeminivitamin D3              | C31H54O5   | [M+Na] <sup>+</sup> | 1.8E+04          | 1.3E+04          | 2.2E+04          |                  |
| 98  | 531.2 | Mucronine B                              | C28H36N4O4 | [M+K] <sup>+</sup>  | 2.2E+04          | 1.8E+04          | 4.6E+04          | 2.8E+04          |
| 99  | 533.2 | DG(14:1/14:0/0:0)                        | C31H58O5   | [M+Na] <sup>+</sup> | 2.2E+04          | 1.7E+04          | 4.4E+04          | 2.7E+04          |
| 100 | 535.2 | Dimyristyl-sn-glycerol                   | C31H60O5   | [M+Na] <sup>+</sup> |                  | 1.0E+04          | 2.8E+04          | 1.5E+04          |
| 101 | 536.2 | PC(P-20:0/0:0)                           | C28H58NO6P | [M+H] <sup>+</sup>  |                  |                  | 4.7E+04          | 1.2E+04          |
| 102 | 537.2 | Phthioceranic acid (C36)                 | C36H72O2   | [M+H] <sup>+</sup>  |                  | 1.1E+04          | 3.8E+04          | 1.5E+04          |
| 103 | 539.2 | Tetratriacontatetraenoic acid            | C34H60O2   | [M+K] <sup>+</sup>  |                  |                  | 2.5E+04          |                  |
| 104 | 545.2 | Oleoylglycerophosphocholine              | C26H53NO7P | [M+Na] <sup>+</sup> | 1.8E+04          | 1.3E+04          | 3.0E+04          | 1.6E+04          |

Table S3: Untargeted metabolic profiling of Goji Berries organic extracts by ESI(+) Ion Trap MS<sup>a</sup>

| #   | m/z   | Putative Annotation <sup>b</sup>             | Formula   | Ion                 | BL1 <sup>c</sup> | BL2 <sup>c</sup> | SL1 <sup>c</sup> | SL2 <sup>c</sup> |
|-----|-------|----------------------------------------------|-----------|---------------------|------------------|------------------|------------------|------------------|
| 105 | 547.2 | DG(14:1/15:0/0:0)                            | C32H60O5  | [M+Na] <sup>+</sup> | 2.1E+04          | 2.0E+04          | 4.9E+04          | 2.7E+04          |
| 106 | 549.3 | DG(14:0/15:0/0:0)                            | C32H62O5  | [M+Na] <sup>+</sup> | 1.8E+04          | 1.6E+04          | 4.1E+04          | 2.5E+04          |
| 107 | 551.2 | (Tetradecenyl)-(octadecenoyl)-sn-glycerol    | C35H66O4  | [M+H] <sup>+</sup>  |                  | 1.2E+04          |                  | 1.3E+04          |
| 108 | 553.3 | ((O-hydroxy-ethane)-hydroxy-propane)- hopane | C35H62O3  | [M+Na] <sup>+</sup> |                  | 1.0E+04          | 3.1E+04          | 1.7E+04          |
| 109 | 557.1 | PG(20:3/0:0)                                 | C26H47O9P | [M+Na] <sup>+</sup> | 4.2E+04          | 2.2E+04          | 7.0E+04          | 3.1E+04          |
| 110 | 559.2 | DG(14:1/16:1/0:0)                            | C33H60O5  | [M+Na] <sup>+</sup> |                  | 9.9E+03          | 2.1E+04          | 1.4E+04          |
| 111 | 561.2 | DG(14:0/16:1/0:0)                            | C33H62O5  | [M+Na] <sup>+</sup> | 2.3E+04          | 1.7E+04          | 4.7E+04          | 3.4E+04          |
| 112 | 563.2 | DG(14:0/16:0/0:0)                            | C33H64O5  | [M+Na] <sup>+</sup> |                  | 1.5E+04          | 3.8E+04          | 2.2E+04          |
| 113 | 565.2 | (D-ribonyl)hopane                            | C35H58O4  | [M+Na] <sup>+</sup> |                  | 1.0E+04          | 2.7E+04          | 1.3E+04          |
| 114 | 567.2 | DG(14:0/18:1/0:0)                            | C35H66O5  | [M+H] <sup>+</sup>  |                  |                  | 2.3E+04          | 1.1E+04          |
| 115 | 569.2 | Cholest-dienol O-beta-D-glucopyranoside      | C33H54O6  | [M+Na] <sup>+</sup> | 2.8E+04          | 1.8E+04          | 7.5E+04          | 2.8E+04          |
| 116 | 571.2 | Hexaprenyl-methoxy-benzoquinol               | C37H56O3  | [M+Na] <sup>+</sup> |                  | 1.1E+04          | 2.1E+04          | 1.2E+04          |
| 117 | 575.2 | DG(15:0/16:1/0:0)                            | C34H64O5  | [M+Na] <sup>+</sup> | 1.8E+04          | 1.4E+04          | 3.8E+04          | 2.3E+04          |
| 118 | 577.2 | DG(15:0/16:0/0:0)                            | C34H66O5  | [M+Na] <sup>+</sup> | 2.1E+04          | 1.6E+04          | 4.4E+04          | 3.0E+04          |
| 119 | 579.2 | PA(O-16:0/12:0)                              | C31H63O7P | [M+H] <sup>+</sup>  |                  | 9.4E+03          | 2.9E+04          | 1.7E+04          |
| 120 | 585.2 | DG(14:0/18:3/0:0)                            | C35H62O5  | [M+Na] <sup>+</sup> |                  | 1.2E+04          | 3.7E+04          | 1.6E+04          |
| 121 | 587.3 | DG(14:0/18:2/0:0)                            | C35H64O5  | [M+Na] <sup>+</sup> |                  |                  | 2.3E+04          | 1.3E+04          |
| 122 | 591.2 | DG(14:0/18:0/0:0)                            | C35H68O5  | [M+Na] <sup>+</sup> |                  | 1.3E+04          | 3.8E+04          | 2.3E+04          |
| 123 | 593.2 | PA(O-16:0/13:0)                              | C32H65O7P | [M+H] <sup>+</sup>  |                  |                  | 2.4E+04          | 1.5E+04          |
| 124 | 601.2 | DG(15:0/18:2/0:0)                            | C36H66O5  | [M+Na] <sup>+</sup> |                  |                  | 2.5E+04          | 1.2E+04          |
| 125 | 603.3 | DG(15:0/18:1/0:0)                            | C36H68O5  | [M+Na] <sup>+</sup> |                  |                  | 2.5E+04          | 1.4E+04          |
| 126 | 605.3 | DG(15:0/18:0/0:0)                            | C36H70O5  | [M+Na] <sup>+</sup> |                  | 1.3E+04          | 3.7E+04          | 2.2E+04          |
| 127 | 607.2 | PA(O-16:0/14:0)                              | C33H67O7P | [M+H] <sup>+</sup>  |                  |                  | 2.0E+04          | 1.2E+04          |
| 128 | 609.3 | 5-Oxoavermectin "2b" aglycone                | C33H46O9  | [M+Na] <sup>+</sup> |                  |                  | 2.0E+04          |                  |
| 129 | 611.3 | DG(14:0/20:4/0:0)                            | C37H64O5  | [M+Na] <sup>+</sup> |                  |                  | 2.0E+04          |                  |
| 130 | 613.2 | DG(14:0/20:3/0:0)                            | C37H66O5  | [M+Na] <sup>+</sup> |                  |                  | 2.1E+04          |                  |



Table S3: Untargeted metabolic profiling of Goji Berries organic extracts by ESI(+) Ion Trap MS<sup>a</sup>

| #   | m/z   | Putative Annotation <sup>b</sup>        | Formula    | Ion                 | BL1 <sup>c</sup> | BL2 <sup>c</sup> | SL1 <sup>c</sup> | SL2 <sup>c</sup> |
|-----|-------|-----------------------------------------|------------|---------------------|------------------|------------------|------------------|------------------|
| 131 | 615.3 | DG(14:0/20:2/0:0)                       | C37H68O5   | [M+Na] <sup>+</sup> |                  |                  | 4.4E+04          | 1.3E+04          |
| 132 | 617.3 | Hexadecanoyl-(octadecenoyl)-sn-glycerol | C37H70O5   | [M+Na] <sup>+</sup> |                  |                  | 2.8E+04          | 1.4E+04          |
| 133 | 619.2 | PA(O-16:0/15:1)                         | C34H67O7P  | [M+H] <sup>+</sup>  |                  |                  | 3.3E+04          | 1.2E+04          |
| 134 | 621.3 | PA(O-16:0/15:0)                         | C34H69O7P  | [M+H] <sup>+</sup>  |                  |                  | 2.9E+04          | 1.4E+04          |
| 135 | 631.3 | PA(P-16:0/16:1)                         | C35H67O7P  | [M+H] <sup>+</sup>  |                  |                  | 2.4E+04          |                  |
| 136 | 633.3 | PA(O-16:0/16:1)                         | C35H69O7P  | [M+H] <sup>+</sup>  |                  |                  | 2.8E+04          |                  |
| 137 | 635.3 | PA(O-16:0/16:0)                         | C35H71O7P  | [M+H] <sup>+</sup>  |                  |                  | 2.6E+04          |                  |
| 138 | 637.3 | DG(14:0/22:5/0:0)                       | C39H66O5   | [M+Na] <sup>+</sup> |                  |                  | 2.4E+04          |                  |
| 139 | 639.3 | DG(14:0/22:4/0:0)                       | C39H68O5   | [M+Na] <sup>+</sup> |                  |                  | 2.2E+04          |                  |
| 140 | 641.3 | DG(14:1/22:2/0:0)                       | C39H70O5   | [M+Na] <sup>+</sup> |                  |                  | 1.9E+04          |                  |
| 141 | 643.0 | DG(14:0/22:2/0:0)                       | C39H72O5   | [M+Na] <sup>+</sup> |                  |                  | 1.9E+04          |                  |
| 142 | 649.3 | PA(O-16:0/17:0)                         | C36H73O7P  | [M+H] <sup>+</sup>  |                  |                  | 3.0E+04          |                  |
| 143 | 651.2 | DG(15:0/22:5/0:0)                       | C40H68O5   | [M+Na] <sup>+</sup> |                  |                  | 2.0E+04          |                  |
| 144 | 663.2 | PA(16:0e/18:0)                          | C37H75O7P  | [M+H] <sup>+</sup>  |                  |                  | 3.7E+04          |                  |
| 145 | 665.2 | DG(16:0/22:5/0:0)                       | C41H70O5   | [M+Na] <sup>+</sup> |                  |                  | 3.0E+04          |                  |
| 146 | 677.3 | PA(O-16:0/19:0)                         | C38H77O7P  | [M+H] <sup>+</sup>  |                  |                  | 2.2E+04          |                  |
| 147 | 679.2 | PG(12:0/17:1)                           | C35H67O10P | [M+H] <sup>+</sup>  |                  |                  | 2.2E+04          |                  |
| 148 | 685.2 | PA(O-16:0/20:3)                         | C39H73O7P  | [M+H] <sup>+</sup>  |                  |                  | 4.3E+04          |                  |
| 149 | 691.2 | PG(P-16:0/15:1)                         | C37H71O9P  | [M+H] <sup>+</sup>  |                  |                  | 2.1E+04          |                  |
| 150 | 693.3 | PG(12:0/18:1)                           | C36H69O10P | [M+H] <sup>+</sup>  |                  |                  | 3.3E+04          |                  |
| 151 | 695.3 | PG(12:0/18:0)                           | C36H71O10P | [M+H] <sup>+</sup>  |                  |                  | 1.9E+04          |                  |
| 152 | 707.3 | PG(12:0/19:1)                           | C37H71O10P | [M+H] <sup>+</sup>  |                  |                  | 2.1E+04          |                  |

<sup>a</sup> Experiments carried out by ESI(+) Esquire 6000 MS

<sup>b</sup> MG Monoacylglycerol; DG Diacylglycerol; TG Triacylglycerol; GalCer Galactosylceramide; PA Phosphatidic acid; PC Phosphatidylcholine; PE Phosphatidylethanolamine; PG Glycerophospholipids; PI Phosphatidylinositol;

Table S3: Untargeted metabolic profiling of Goji Berries organic extracts by ESI(+) Ion Trap MS<sup>a</sup>

| # | m/z | Putative Annotation <sup>b</sup> | Formula | Ion | BL1 <sup>c</sup> | BL2 <sup>c</sup> | SL1 <sup>c</sup> | SL2 <sup>c</sup> |
|---|-----|----------------------------------|---------|-----|------------------|------------------|------------------|------------------|
|---|-----|----------------------------------|---------|-----|------------------|------------------|------------------|------------------|

<sup>c</sup> BL1 and BL2 stand for Big Lifeberry harvested in August and October, respectively; SL1 and SL2 stand for Sweet Lifeberry harvested in August and October, respectively.

Table S4: Untargeted metabolic profiling of Goji Berries organic extracts by ESI(-) Ion Trap MS<sup>a</sup>

| #  | m/z   | Putative Annotation <sup>a</sup> | Formula  | Ion     | BL1 <sup>b</sup> | BL2 <sup>b</sup> | SL1 <sup>b</sup> | SL2 <sup>b</sup> |
|----|-------|----------------------------------|----------|---------|------------------|------------------|------------------|------------------|
| 1  | 110.8 | Hexenedial                       | C6H8O2   | [M-H]-  |                  |                  | 1.9E+03          |                  |
| 2  | 124.9 | Octenal                          | C8H14O   | [M-H]-  | 1.4E+03          |                  |                  |                  |
| 3  | 128.1 | Pyroglutamic acid                | C5H7NO   | [M-H]-  | 4.6E+03          | 1.4E+03          | 3.4E+03          | 5.5E+03          |
| 4  | 136.9 | Hexan-1-ol                       | C6H14O   | [M+Cl]- | 1.6E+03          |                  |                  |                  |
| 5  | 146.9 | Hexenedial                       | C6H8O2   | [M+Cl]- | 1.7E+03          |                  | 3.6E+03          |                  |
| 6  | 156.9 | Methyl-octanoic acid             | C9H18O2  | [M-H]-  | 1.6E+03          |                  |                  |                  |
| 7  | 158.8 | Octatrienal                      | C8H10O   | [M+Cl]- |                  |                  | 7.7E+03          | 2.6E+03          |
| 8  | 160.9 | Octenal                          | C8H14O   | [M+Cl]- |                  |                  | 7.1E+03          | 2.3E+03          |
| 9  | 169.7 | Decanamide                       | C10H21NO | [M-H]-  |                  |                  | 4.5E+03          |                  |
| 10 | 171.0 | Limonene                         | C10H16   | [M+Cl]- | 1.5E+03          |                  |                  | 3.7E+03          |
| 11 | 172.9 | Suberic acid                     | C8H14O4  | [M-H]-  |                  |                  | 2.1E+03          |                  |
| 12 | 179.0 | Octenoic acid                    | C8H14O2  | [M+Cl]- | 1.3E+03          |                  |                  | 2.3E+03          |
| 13 | 186.0 | Hydroxyadenine                   | C5H5N5O  | [M+Cl]- | 1.4E+03          |                  | 2.3E+03          | 2.4E+03          |
| 14 | 187.0 | Decadienal                       | C10H16O  | [M+Cl]- | 1.7E+03          |                  | 3.7E+03          |                  |
| 15 | 199.0 | Decenedioic acid                 | C10H16O4 | [M-H]-  | 2.3E+03          | 9.0E+02          | 2.5E+03          | 5.1E+03          |
| 16 | 201.0 | Decanedioic acid                 | C10H18O4 | [M-H]-  | 2.3E+03          |                  |                  |                  |
| 17 | 213.1 | Methyl-dodecanoic acid           | C13H26O2 | [M-H]-  |                  |                  |                  | 2.8E+03          |
| 18 | 225.1 | Tuberonic acid                   | C12H18O4 | [M-H]-  | 1.7E+03          |                  |                  | 3.6E+03          |
| 19 | 227.1 | Myristic acid                    | C14H28O2 | [M-H]-  | 2.2E+04          | 2.4E+04          | 2.1E+04          | 6.6E+04          |
| 20 | 239.1 | Tridecenyl acetate               | C15H28O2 | [M-H]-  | 2.2E+03          | 1.2E+03          | 2.0E+03          | 5.7E+03          |
| 21 | 241.1 | Methyl-myristic acid             | C15H30O2 | [M-H]-  | 1.0E+04          | 5.5E+03          | 9.1E+03          | 3.1E+04          |
| 22 | 253.1 | Palmitoleic acid                 | C16H30O2 | [M-H]-  | 2.2E+04          | 1.2E+04          | 1.6E+04          | 6.2E+04          |
| 23 | 255.2 | Palmitic acid                    | C16H32O2 | [M-H]-  | 4.9E+04          | 2.4E+04          | 3.9E+04          | 2.1E+05          |
| 24 | 265.0 | Methyl-Hexadecadienoic acid      | C17H30O2 | [M-H]-  | 3.9E+04          | 2.1E+04          | 5.6E+04          | 6.5E+04          |
| 25 | 267.1 | Methyl-palmitoleic acid          | C17H32O2 | [M-H]-  | 8.8E+03          | 4.4E+03          | 7.2E+03          | 2.2E+04          |
| 26 | 269.1 | Methyl-palmitic acid             | C17H34O2 | [M-H]-  | 9.1E+03          | 4.4E+03          | 6.8E+03          | 3.3E+04          |

Table S4: Untargeted metabolic profiling of Goji Berries organic extracts by ESI(-) Ion Trap MS<sup>a</sup>

| #  | m/z   | Putative Annotation <sup>a</sup>    | Formula  | Ion     | BL1 <sup>b</sup> | BL2 <sup>b</sup> | SL1 <sup>b</sup> | SL2 <sup>b</sup> |
|----|-------|-------------------------------------|----------|---------|------------------|------------------|------------------|------------------|
| 27 | 271.0 | Hexadecadienal                      | C16H28O  | [M+Cl]- |                  |                  |                  | 2.7E+03          |
| 28 | 277.1 | Linolenic acid                      | C18H30O2 | [M-H]   | 1.5E+03          |                  | 2.1E+03          | 2.4E+03          |
| 29 | 279.1 | Linoleic acid                       | C18H32O2 | [M-H]-  | 1.1E+04          | 3.1E+03          | 6.6E+03          | 2.4E+04          |
| 30 | 281.1 | Oleic acid                          | C18H34O2 | [M-H]-  | 3.1E+04          | 1.2E+04          | 1.8E+04          | 1.0E+05          |
| 31 | 283.1 | Stearic acid                        | C18H36O2 | [M-H]-  | 3.6E+04          | 1.1E+04          | 1.9E+04          | 1.1E+05          |
| 32 | 293.1 | Methyl lineoleate                   | C19H34O2 | [M-H]-  | 2.1E+04          | 7.9E+03          | 2.4E+04          | 3.7E+04          |
| 33 | 295.1 | Methyl oleate                       | C19H36O2 | [M-H]-  | 3.6E+03          | 1.4E+03          | 2.9E+03          | 7.1E+03          |
| 34 | 297.0 | Methyl stearate                     | C19H38O2 | [M-H]-  | 6.9E+03          | 2.5E+03          | 9.4E+03          | 1.4E+04          |
| 35 | 299.0 | Hydroxystearic acid                 | C18H36O3 | [M-H]-  | 1.7E+03          |                  | 1.9E+03          | 3.7E+03          |
| 36 | 305.1 | Linolenic acid, ethyl ester         | C20H34O2 | [M-H]-  | 1.3E+03          |                  |                  | 2.9E+03          |
| 37 | 307.0 | Eicosadienoic acid                  | C20H36O2 | [M-H]-  | 8.1E+03          | 2.3E+03          | 5.8E+03          | 1.2E+04          |
| 38 | 309.0 | Eicosenoic acid                     | C20H38O2 | [M-H]-  | 2.8E+04          | 9.2E+03          | 2.3E+04          | 4.6E+04          |
| 39 | 311.0 | Arachidic acid                      | C20H40O2 | [M-H]-  | 2.4E+04          | 8.1E+03          | 3.5E+04          | 4.6E+04          |
| 40 | 313.0 | Dihydroxy-octadecenoic acid         | C18H34O4 | [M-H]-  | 3.1E+03          | 1.1E+03          | 3.8E+03          | 5.9E+03          |
| 41 | 315.0 | Dihydroxy-octadecanoic acid         | C18H36O4 | [M-H]-  | 1.9E+03          |                  | 2.6E+03          | 3.4E+03          |
| 42 | 321.0 | Eicosadienoic acid, methyl ester    | C21H38O2 | [M-H]-  | 2.6E+03          | 1.0E+03          | 3.0E+03          | 4.9E+03          |
| 43 | 323.0 | Eicosenoic acid, methyl ester       | C21H40O2 | [M-H]-  | 2.2E+03          | 1.1E+03          | 2.7E+03          | 3.9E+03          |
| 44 | 325.0 | Methyl arachidate                   | C21H42O2 | [M-H]-  | 2.2E+04          | 8.4E+03          | 4.0E+04          | 4.4E+04          |
| 45 | 327.0 | Hydroxy-eicosanoic acid             | C20H40O3 | [M-H]-  | 2.8E+03          |                  | 4.2E+03          | 5.2E+03          |
| 46 | 329.1 | MG(0:0/16:0/0:0)                    | C19H38O4 | [M-H]-  | 1.8E+03          |                  |                  | 2.6E+03          |
| 47 | 335.1 | Docosadienoic acid                  | C22H40O2 | [M-H]-  | 1.9E+03          |                  |                  | 3.6E+03          |
| 48 | 337.0 | Docosenoic acid (22:1)              | C22H42O2 | [M-H]-  | 9.6E+03          | 2.8E+03          | 9.3E+03          | 1.9E+04          |
| 49 | 339.0 | Docosanoic acid (22:0)              | C22H44O2 | [M-H]-  | 1.7E+04          | 6.1E+03          | 3.0E+04          | 4.0E+04          |
| 50 | 341.0 | Eicosanedioic acid                  | C20H38O4 | [M-H]-  | 4.5E+03          | 2.1E+03          | 5.6E+03          | 8.6E+03          |
| 51 | 343.0 | Dihydroxy-methoxy-octadecenoic acid | C19H36O5 | [M-H]-  | 1.9E+03          |                  | 2.0E+03          | 2.9E+03          |
| 52 | 351.1 | Docosenoic acid methyl ester        | C23H44O2 | [M-H]-  |                  |                  |                  | 2.3E+03          |

Table S4: Untargeted metabolic profiling of Goji Berries organic extracts by ESI(-) Ion Trap MS<sup>a</sup>

| #  | m/z   | Putative Annotation <sup>a</sup>  | Formula   | Ion     | BL1 <sup>b</sup> | BL2 <sup>b</sup> | SL1 <sup>b</sup> | SL2 <sup>b</sup> |
|----|-------|-----------------------------------|-----------|---------|------------------|------------------|------------------|------------------|
| 53 | 353.0 | Docosanoic acid, methyl ester     | C23H46O2  | [M-H]-  | 1.8E+04          | 5.7E+03          | 1.5E+04          | 3.1E+04          |
| 54 | 355.0 | Hydroxy-docosanoic acid           | C22H44O3  | [M-H]-  | 2.6E+03          | 9.4E+02          | 2.8E+03          | 4.2E+03          |
| 55 | 363.0 | Tetracosadienoic acid             | C24H44O2  | [M-H]-  | 1.8E+03          |                  | 2.0E+03          | 3.1E+03          |
| 56 | 365.1 | Tetracosenoic acid (24:1)         | C24H46O2  | [M-H]-  | 1.7E+03          |                  |                  | 3.7E+03          |
| 57 | 367.2 | Tetracosanoic acid (24:0)         | C24H48O2  | [M-H]-  | 4.5E+03          | 1.6E+03          | 3.0E+03          | 1.3E+04          |
| 58 | 369.1 | Docosanedioic acid                | C22H42O4  | [M-H]-  | 2.0E+03          |                  |                  | 3.7E+03          |
| 59 | 371.1 | Deoxyoleandolide                  | C20H36O6  | [M-H]-  |                  |                  |                  | 2.3E+03          |
| 60 | 378.9 | Tetracosenoic acid, methyl ester  | C25H48O2  | [M-H]-  | 1.9E+03          |                  | 2.8E+03          | 3.2E+03          |
| 61 | 381.1 | Hydroxy-tetracosenoic acid        | C24H46O3  | [M-H]-  | 6.8E+03          | 2.2E+03          | 6.9E+03          | 1.6E+04          |
| 62 | 383.1 | Methyl-tetracosanoic acid         | C25H50O2  | [M-H]-  | 2.2E+03          |                  | 2.7E+03          | 5.2E+03          |
| 63 | 391.1 | Hexacosadienoic acid              | C26H48O2  | [M-H]-  | 1.3E+03          |                  |                  | 2.8E+03          |
| 64 | 393.1 | Hexacosenoic acid                 | C26H50O2  | [M-H]-  |                  |                  |                  | 2.6E+03          |
| 65 | 395.2 | Methyl-hexacosanoic acid          | C26H52O2  | [M-H]-  | 2.3E+03          |                  | 2.4E+03          | 7.5E+03          |
| 66 | 397.1 | Tetracosanedioic acid             | C24H46O4  | [M-H]-  | 9.5E+03          | 3.1E+03          | 9.3E+03          | 1.9E+04          |
| 67 | 399.1 | Hydroxyvitamin D3                 | C27H44O2  | [M-H]-  | 1.6E+03          |                  |                  | 2.9E+03          |
| 68 | 409.2 | Gama-Tocotrienol                  | C28H42O2  | [M-H]-  |                  |                  |                  | 2.7E+03          |
| 69 | 411.2 | Hydroxyhexacosanoic acid          | C26H52O3  | [M-H]-  | 1.5E+03          |                  |                  | 4.2E+03          |
| 70 | 416.9 | Phyllanthin                       | C24H34O6  | [M-H]-  |                  |                  | 2.0E+03          |                  |
| 71 | 421.1 | Octacosenoic acid                 | C28H54O2  | [M-H]-  |                  |                  |                  | 2.7E+03          |
| 72 | 423.2 | Montanic acid                     | C28H56O2  | [M-H]-  |                  |                  | 1.9E+03          | 4.4E+03          |
| 73 | 425.1 | Hexacosanedioic acid              | C26H50O4  | [M-H]-  | 3.9E+03          | 1.3E+03          | 5.0E+03          | 8.3E+03          |
| 74 | 431.0 | Calcitriol                        | C27H44O4  | [M-H]-  | 2.1E+03          |                  | 5.4E+03          | 3.9E+03          |
| 75 | 433.1 | Trihydroxy-dihydrovitamin D3      | C27H46O4  | [M-H]-  |                  |                  |                  | 2.7E+03          |
| 76 | 439.2 | MG(24:1/0:0/0:0)                  | C27H52O4  | [M-H]-  |                  |                  |                  | 3.0E+03          |
| 77 | 441.1 | Methyl-hexacosadienoic acid       | C27H50O2  | [M+Cl]- | 4.4E+03          | 1.8E+03          | 5.3E+03          | 9.6E+03          |
| 78 | 443.1 | Geranylgeranyl-glycerol phosphate | C23H41O6P | [M-H]-  |                  |                  |                  | 2.4E+03          |

Table S4: Untargeted metabolic profiling of Goji Berries organic extracts by ESI(-) Ion Trap MS<sup>a</sup>

| #  | m/z   | Putative Annotation <sup>a</sup>                       | Formula   | Ion     | BL1 <sup>b</sup> | BL2 <sup>b</sup> | SL1 <sup>b</sup> | SL2 <sup>b</sup> |
|----|-------|--------------------------------------------------------|-----------|---------|------------------|------------------|------------------|------------------|
| 79 | 449.1 | Myristyl oleate                                        | C30H58O2  | [M-H]-  |                  |                  |                  | 2.7E+03          |
| 80 | 451.2 | Melissic acid                                          | C30H60O2  | [M-H]-  |                  |                  |                  | 2.7E+03          |
| 81 | 465.2 | Melissic acid methyl ester                             | C31H62O2  | [M-H]-  | 2.4E+03          | 1.1E+03          | 5.8E+03          | 9.0E+03          |
| 82 | 467.2 | Hydroxy-triacontanoic acid                             | C30H60O3  | [M-H]-  |                  |                  |                  | 2.9E+03          |
| 83 | 469.2 | Methyl-octacosadienoic acid                            | C29H54O2  | [M+Cl]- | 1.6E+03          |                  | 3.0E+03          | 4.7E+03          |
| 84 | 477.2 | Palmityl oleate                                        | C32H62O2  | [M-H]-  |                  |                  |                  | 2.3E+03          |
| 85 | 481.2 | Triacontanedioic acid                                  | C30H58O4  | [M-H]-  |                  |                  |                  | 3.0E+03          |
| 86 | 483.2 | Triaccontenoic acid (30:2)                             | C30H56O2  | [M+Cl]- |                  |                  |                  | 2.8E+03          |
| 87 | 485.2 | Triaccontenoic acid (30:1)                             | C30H58O2  | [M+Cl]- | 9.0E+04          | 2.4E+05          | 1.8E+05          | 2.6E+05          |
| 88 | 487.2 | Fucosyllactose                                         | C18H32O15 | [M-H]-  | 4.8E+03          | 1.2E+04          | 9.8E+03          | 1.4E+04          |
| 89 | 511.1 | DG(14:0/14:0/0:0)                                      | C31H60O5  | [M-H]-  |                  |                  |                  | 2.4E+03          |
| 90 | 573.3 | DG(16:1/14:0/0:0)                                      | C33H62O5  | [M+Cl]- |                  |                  | 2.2E+03          | 2.5E+03          |
| 91 | 601.3 | DG(16:0/16:1/0:0)                                      | C35H66O5  | [M+Cl]- |                  |                  | 2.3E+03          |                  |
| 92 | 615.1 | Dimethyl-pentadecanoyl-(ladderaneoctanyl)-sn- glycerol | C40H72O4  | [M-H]-  |                  |                  | 2.4E+03          | 3.3E+03          |
| 93 | 617.1 | DG(15:0/18:0/0:0)                                      | C36H70O5  | [M+Cl]- |                  |                  | 2.0E+03          | 2.4E+03          |
| 94 | 671.3 | PA(16:0/18:2)                                          | C37H69O8P | [M-H]-  |                  | 1.1E+03          | 3.8E+03          | 4.4E+03          |
| 95 | 695.3 | PA(18:1/18:3)                                          | C39H69O8P | [M-H]-  |                  | 9.5E+02          | 2.3E+03          | 3.8E+03          |

a Experiments carried out by ESI(-) Esquire 6000 MS

b MG Monoacylglycerol; DG Diacylglycerol; TG Triacylglycerol; GalCer Galactosylceramide; PA Phosphatidic acid; PC Phosphatidylcholine; PE Phosphatidylethanolamine; PG Glycerophospholipids; PI Phosphatidylinositol;

c BL1 and BL2 stand for Big Lifeberry harvested in August and October, respectively; SL1 and SL2 stand for Sweet Lifeberry harvested in August and October, respectively.

Table S5: Untargeted metabolic profiling of Goji Berries leaves hydroalcoholic extracts by ESI(+) FT-ICR MS

| #  | Plausible compound <sup>a</sup> | Ion                 | Molecular formula (M) | Theo. m/z <sup>b</sup> | Exp. m/z <sup>c</sup> | ppm  | Intensity |
|----|---------------------------------|---------------------|-----------------------|------------------------|-----------------------|------|-----------|
| 1  | N,N'-Dimethylurea               | [M+H] <sup>+</sup>  | C3H8N2O               | 89.07080               | 89.07094              | -1.6 | 1.2E+05   |
| 2  | Glyoxylic acid                  | [M+Na] <sup>+</sup> | C2H2O3                | 96.98941               | 96.98961              | -2.1 | 1.7E+05   |
| 3  | Trimethylamine N-oxide          | [M+Na] <sup>+</sup> | C3H9NO                | 98.05752               | 98.05763              | -1.2 | 1.4E+05   |
| 4  | Pentadienoic acid               | [M+H] <sup>+</sup>  | C5H6O2                | 99.04426               | 99.04406              | 2.1  | 1.3E+05   |
| 5  | Glutaraldehyde                  | [M+H] <sup>+</sup>  | C5H8O2                | 101.05974              | 101.05971             | 0.3  | 1.1E+05   |
| 6  | Aminopentanal                   | [M+H] <sup>+</sup>  | C5H11NO               | 102.09127              | 102.09134             | -0.7 | 1.2E+05   |
| 7  | Serine                          | [M+H] <sup>+</sup>  | C3H7NO3               | 106.04999              | 106.04987             | 1.1  | 1.5E+05   |
| 8  | Diethanolamine                  | [M+H] <sup>+</sup>  | C4H11NO2              | 106.08629              | 106.08626             | 0.3  | 2.5E+05   |
| 9  | Propynoic acid                  | [M+K] <sup>+</sup>  | C3H2O2                | 108.96837              | 108.96864             | -2.5 | 1.2E+05   |
| 10 | Methyl sulfate                  | [M+H] <sup>+</sup>  | CH4O4S                | 112.99049              | 112.99031             | 1.6  | 1.5E+05   |
| 11 | Thioacetic acid                 | [M+K] <sup>+</sup>  | C2H4OS                | 114.96164              | 114.96145             | 1.7  | 1.4E+05   |
| 12 | Glycerol                        | [M+Na] <sup>+</sup> | C3H8O3                | 115.03687              | 115.03656             | 2.7  | 1.7E+05   |
| 13 | Cysteamine                      | [M+K] <sup>+</sup>  | C2H7NS                | 115.99285              | 115.99308             | -2.0 | 1.0E+05   |
| 14 | Cumene                          | [M+H] <sup>+</sup>  | C9H12                 | 121.10121              | 121.10118             | 0.3  | 1.5E+05   |
| 15 | Octatrienal                     | [M+H] <sup>+</sup>  | C8H10O                | 123.08018              | 123.08044             | -2.1 | 1.3E+05   |
| 16 | Octadienal                      | [M+H] <sup>+</sup>  | C8H12O                | 125.09591              | 125.09609             | -1.5 | 1.3E+05   |
| 17 | Putrescine                      | [M+K] <sup>+</sup>  | C4H12N2               | 127.06322              | 127.06321             | 0.1  | 2.2E+05   |
| 18 | Melamine                        | [M+H] <sup>+</sup>  | C3H6N6                | 127.07298              | 127.07267             | 2.4  | 3.9E+05   |
| 19 | Pyroglutamic acid               | [M+H] <sup>+</sup>  | C5H7NO3               | 130.04959              | 130.04987             | -2.1 | 1.5E+05   |
| 20 | Aniline                         | [M+K] <sup>+</sup>  | C6H7N                 | 132.02080              | 132.02101             | -1.6 | 1.2E+05   |
| 21 | Leucine                         | [M+H] <sup>+</sup>  | C6H13NO2              | 132.10215              | 132.10191             | 1.9  | 1.0E+05   |
| 22 | Pyridinol                       | [M+K] <sup>+</sup>  | C5H5NO                | 133.99999              | 134.00027             | -2.1 | 2.7E+05   |
| 23 | Ureidoglycine                   | [M+H] <sup>+</sup>  | C3H7N3O3              | 134.05584              | 134.05602             | -1.3 | 3.4E+05   |
| 24 | Cinnamyl alcohol                | [M+H] <sup>+</sup>  | C9H10O                | 135.08067              | 135.08044             | 1.7  | 1.3E+05   |
| 25 | Adenine                         | [M+H] <sup>+</sup>  | C5H5N5                | 136.06148              | 136.06177             | -2.1 | 2.1E+05   |
| 26 | Caprolactam                     | [M+Na] <sup>+</sup> | C6H11NO               | 136.07293              | 136.07328             | -2.6 | 1.7E+05   |

Table S5: Untargeted metabolic profiling of Goji Berries leaves hydroalcoholic extracts by ESI(+) FT-ICR MS

| #  | Plausible compound <sup>a</sup>    | Ion                 | Molecular formula (M)                                       | Theo. m/z <sup>b</sup> | Exp. m/z <sup>c</sup> | ppm  | Intensity |
|----|------------------------------------|---------------------|-------------------------------------------------------------|------------------------|-----------------------|------|-----------|
| 27 | Hypoxanthine                       | [M+H] <sup>+</sup>  | C <sub>5</sub> H <sub>4</sub> N <sub>4</sub> O              | 137.04612              | 137.04579             | 2.4  | 1.4E+05   |
| 28 | Nonatrienal                        | [M+H] <sup>+</sup>  | C <sub>9</sub> H <sub>12</sub> O                            | 137.09576              | 137.09609             | -2.4 | 1.5E+05   |
| 29 | Levulinic acid                     | [M+Na] <sup>+</sup> | C <sub>5</sub> H <sub>8</sub> O <sub>3</sub>                | 139.03624              | 139.03656             | -2.3 | 3.8E+05   |
| 30 | Valine                             | [M+Na] <sup>+</sup> | C <sub>5</sub> H <sub>11</sub> NO <sub>2</sub>              | 140.06814              | 140.06820             | -0.4 | 2.8E+05   |
| 31 | Succinic acid                      | [M+Na] <sup>+</sup> | C <sub>4</sub> H <sub>6</sub> O <sub>4</sub>                | 141.01613              | 141.01583             | 2.1  | 1.3E+05   |
| 32 | Allophanic acid                    | [M+K] <sup>+</sup>  | C <sub>2</sub> H <sub>4</sub> N <sub>2</sub> O <sub>3</sub> | 142.98508              | 142.98535             | -1.9 | 1.3E+05   |
| 33 | Cyanopyridine                      | [M+K] <sup>+</sup>  | C <sub>6</sub> H <sub>4</sub> N <sub>2</sub>                | 143.00042              | 143.00061             | -1.3 | 1.5E+05   |
| 34 | Mercaptolactate                    | [M+Na] <sup>+</sup> | C <sub>3</sub> H <sub>6</sub> O <sub>3</sub> S              | 144.99304              | 144.99299             | 0.4  | 5.1E+05   |
| 35 | Erythritol                         | [M+Na] <sup>+</sup> | C <sub>4</sub> H <sub>10</sub> O <sub>4</sub>               | 145.04670              | 145.04713             | -3.0 | 3.8E+05   |
| 36 | Keto-glutaramic acid               | [M+H] <sup>+</sup>  | C <sub>5</sub> H <sub>7</sub> NO <sub>4</sub>               | 146.04512              | 146.04478             | 2.3  | 2.5E+05   |
| 37 | Triethanolamine                    | [M+H] <sup>+</sup>  | C <sub>6</sub> H <sub>15</sub> NO <sub>3</sub>              | 150.11248              | 150.11247             | 0.1  | 3.5E+05   |
| 38 | Thiodiacetic acid                  | [M+H] <sup>+</sup>  | C <sub>4</sub> H <sub>6</sub> O <sub>4</sub> S              | 151.00574              | 151.00596             | -1.4 | 2.5E+05   |
| 39 | Cyclohexane-1,3-dione              | [M+K] <sup>+</sup>  | C <sub>6</sub> H <sub>8</sub> O <sub>2</sub>                | 151.01578              | 151.01559             | 1.3  | 1.6E+05   |
| 40 | Pimelic dialdehyde                 | [M+Na] <sup>+</sup> | C <sub>7</sub> H <sub>12</sub> O <sub>2</sub>               | 151.07253              | 151.07295             | -2.8 | 1.9E+05   |
| 41 | Phenylpropanolamine                | [M+H] <sup>+</sup>  | C <sub>9</sub> H <sub>13</sub> NO                           | 152.10709              | 152.10699             | 0.7  | 1.5E+05   |
| 42 | Thiopurine                         | [M+H] <sup>+</sup>  | C <sub>5</sub> H <sub>4</sub> N <sub>4</sub> S              | 153.02332              | 153.02294             | 2.5  | 1.6E+05   |
| 43 | Isopropylcatechol                  | [M+H] <sup>+</sup>  | C <sub>9</sub> H <sub>12</sub> O <sub>2</sub>               | 153.09143              | 153.09101             | 2.8  | 1.4E+05   |
| 44 | Geranial                           | [M+H] <sup>+</sup>  | C <sub>10</sub> H <sub>16</sub> O                           | 153.12717              | 153.12739             | -1.4 | 1.4E+05   |
| 45 | Hydroxyproline                     | [M+Na] <sup>+</sup> | C <sub>5</sub> H <sub>9</sub> NO <sub>3</sub>               | 154.04766              | 154.04746             | 1.3  | 1.3E+05   |
| 46 | Vanillylamine                      | [M+H] <sup>+</sup>  | C <sub>8</sub> H <sub>11</sub> NO <sub>2</sub>              | 154.08665              | 154.08626             | 2.6  | 1.6E+05   |
| 47 | Glutarate                          | [M+Na] <sup>+</sup> | C <sub>5</sub> H <sub>8</sub> O <sub>4</sub>                | 155.03185              | 155.03148             | 2.4  | 2.7E+05   |
| 48 | Hydroxyhexanoic acid               | [M+Na] <sup>+</sup> | C <sub>6</sub> H <sub>12</sub> O <sub>3</sub>               | 155.06816              | 155.06786             | 1.9  | 2.8E+05   |
| 49 | S-Dimethylsulfonium propionic acid | [M+Na] <sup>+</sup> | C <sub>5</sub> H <sub>10</sub> O <sub>2</sub> S             | 157.02977              | 157.02937             | 2.5  | 3.0E+05   |
| 50 | Homostachydrine                    | [M+H] <sup>+</sup>  | C <sub>8</sub> H <sub>15</sub> NO <sub>2</sub>              | 158.11779              | 158.11756             | 1.5  | 1.0E+05   |
| 51 | Isopropylmaleate                   | [M+H] <sup>+</sup>  | C <sub>7</sub> H <sub>10</sub> O <sub>4</sub>               | 159.06513              | 159.06519             | -0.3 | 2.3E+05   |
| 52 | Trigonelline                       | [M+Na] <sup>+</sup> | C <sub>7</sub> H <sub>7</sub> NO <sub>2</sub>               | 160.03670              | 160.03690             | -1.2 | 1.2E+05   |



Table S5: Untargeted metabolic profiling of Goji Berries leaves hydroalcoholic extracts by ESI(+) FT-ICR MS

| #  | Plausible compound <sup>a</sup> | Ion                 | Molecular formula (M)                                        | Theo. m/z <sup>b</sup> | Exp. m/z <sup>c</sup> | ppm  | Intensity |
|----|---------------------------------|---------------------|--------------------------------------------------------------|------------------------|-----------------------|------|-----------|
| 53 | Phenylethylamine                | [M+K] <sup>+</sup>  | C <sub>8</sub> H <sub>11</sub> N                             | 160.05271              | 160.05231             | 2.5  | 1.2E+05   |
| 54 | Urocanic acid                   | [M+Na] <sup>+</sup> | C <sub>6</sub> H <sub>6</sub> N <sub>2</sub> O <sub>2</sub>  | 161.03236              | 161.03215             | 1.3  | 1.8E+05   |
| 55 | Umbelliferone                   | [M+H] <sup>+</sup>  | C <sub>9</sub> H <sub>6</sub> O <sub>3</sub>                 | 163.03897              | 163.03897             | 0.0  | 1.1E+06   |
| 56 | Nicotine                        | [M+H] <sup>+</sup>  | C <sub>10</sub> H <sub>14</sub> N <sub>2</sub>               | 163.12297              | 163.12297             | 0.0  | 1.0E+06   |
| 57 | Ciliatine                       | [M+K] <sup>+</sup>  | C <sub>2</sub> H <sub>8</sub> NO <sub>3</sub> P              | 163.98778              | 163.98734             | 2.7  | 4.5E+05   |
| 58 | Amino-imidazolecarboxylic acid  | [M+K] <sup>+</sup>  | C <sub>4</sub> H <sub>5</sub> N <sub>3</sub> O <sub>2</sub>  | 166.00089              | 166.00134             | -2.7 | 2.3E+05   |
| 59 | Coniine                         | [M+K] <sup>+</sup>  | C <sub>8</sub> H <sub>17</sub> N                             | 166.09945              | 166.09926             | 1.2  | 3.0E+05   |
| 60 | Aceto valeric acid              | [M+Na] <sup>+</sup> | C <sub>7</sub> H <sub>12</sub> O <sub>3</sub>                | 167.06795              | 167.06786             | 0.5  | 3.0E+05   |
| 61 | Acetamidobutanoate              | [M+Na] <sup>+</sup> | C <sub>6</sub> H <sub>11</sub> NO <sub>3</sub>               | 168.06289              | 168.06311             | -1.3 | 1.2E+05   |
| 62 | Mevaldic acid                   | [M+Na] <sup>+</sup> | C <sub>6</sub> H <sub>10</sub> O <sub>4</sub>                | 169.04711              | 169.04713             | -0.1 | 1.7E+06   |
| 63 | Oxaluric acid                   | [M+K] <sup>+</sup>  | C <sub>3</sub> H <sub>4</sub> N <sub>2</sub> O <sub>4</sub>  | 170.98021              | 170.98027             | -0.3 | 1.6E+05   |
| 64 | Tetrahydroisoquinoline          | [M+K] <sup>+</sup>  | C <sub>9</sub> H <sub>11</sub> N                             | 172.05190              | 172.05231             | -2.4 | 1.6E+05   |
| 65 | Arginine                        | [M+H] <sup>+</sup>  | C <sub>6</sub> H <sub>14</sub> N <sub>4</sub> O <sub>2</sub> | 175.11909              | 175.11895             | 0.8  | 1.3E+05   |
| 66 | N-Guanylhistamine               | [M+Na] <sup>+</sup> | C <sub>6</sub> H <sub>11</sub> N <sub>5</sub>                | 176.09104              | 176.09067             | 2.1  | 1.4E+05   |
| 67 | Propylmalate                    | [M+H] <sup>+</sup>  | C <sub>7</sub> H <sub>12</sub> O <sub>5</sub>                | 177.07589              | 177.07575             | 0.8  | 1.2E+05   |
| 68 | Hexose-lactone                  | [M+H] <sup>+</sup>  | C <sub>6</sub> H <sub>10</sub> O <sub>6</sub>                | 179.05482              | 179.05501             | -1.1 | 1.7E+05   |
| 69 | Oxo-octenoic acid               | [M+Na] <sup>+</sup> | C <sub>8</sub> H <sub>12</sub> O <sub>3</sub>                | 179.06770              | 179.06786             | -0.9 | 2.2E+05   |
| 70 | Hydroxynicotine                 | [M+H] <sup>+</sup>  | C <sub>10</sub> H <sub>14</sub> N <sub>2</sub> O             | 179.11819              | 179.11789             | 1.7  | 2.0E+05   |
| 71 | Keto-n-caprylic acid            | [M+Na] <sup>+</sup> | C <sub>8</sub> H <sub>14</sub> O <sub>3</sub>                | 181.08399              | 181.08352             | 2.6  | 4.4E+05   |
| 72 | Tert-Butyl-methylcatechol       | [M+H] <sup>+</sup>  | C <sub>11</sub> H <sub>16</sub> O <sub>2</sub>               | 181.12234              | 181.12231             | 0.2  | 2.1E+05   |
| 73 | Pimelic acid                    | [M+Na] <sup>+</sup> | C <sub>7</sub> H <sub>12</sub> O <sub>4</sub>                | 183.06294              | 183.06278             | 0.9  | 1.6E+06   |
| 74 | Norcotinine                     | [M+Na] <sup>+</sup> | C <sub>9</sub> H <sub>10</sub> N <sub>2</sub> O              | 185.06882              | 185.06853             | 1.5  | 2.3E+05   |
| 75 | Acetylcysteine                  | [M+Na] <sup>+</sup> | C <sub>5</sub> H <sub>9</sub> NO <sub>3</sub> S              | 186.01915              | 186.01953             | -2.1 | 1.4E+05   |
| 76 | Triethanolamine                 | [M+K] <sup>+</sup>  | C <sub>6</sub> H <sub>15</sub> NO <sub>3</sub>               | 188.06860              | 188.06835             | 1.3  | 1.5E+05   |
| 77 | Diethylaniline                  | [M+K] <sup>+</sup>  | C <sub>10</sub> H <sub>15</sub> N                            | 188.08396              | 188.08361             | 1.9  | 1.4E+05   |
| 78 | Guanine                         | [M+K] <sup>+</sup>  | C <sub>5</sub> H <sub>5</sub> N <sub>5</sub> O               | 190.01226              | 190.01257             | -1.6 | 9.9E+04   |

Table S5: Untargeted metabolic profiling of Goji Berries leaves hydroalcoholic extracts by ESI(+) FT-ICR MS

| #   | Plausible compound <sup>a</sup> | Ion                 | Molecular formula (M) | Theo. m/z <sup>b</sup> | Exp. m/z <sup>c</sup> | ppm  | Intensity |
|-----|---------------------------------|---------------------|-----------------------|------------------------|-----------------------|------|-----------|
| 79  | Diaminosalicylic acid           | [M+Na] <sup>+</sup> | C7H8N2O3              | 191.04249              | 191.04271             | -1.2 | 2.1E+05   |
| 80  | Geranic acid                    | [M+Na] <sup>+</sup> | C10H16O2              | 191.10422              | 191.10425             | -0.2 | 1.8E+06   |
| 81  | Dimethylaminoethylphosphonate   | [M+K] <sup>+</sup>  | C4H12NO3P             | 192.01814              | 192.01864             | -2.6 | 1.1E+05   |
| 82  | Citronellic acid                | [M+Na] <sup>+</sup> | C10H18O2              | 193.12041              | 193.11990             | 2.6  | 3.4E+05   |
| 83  | Aminopropanol O-phosphate       | [M+K] <sup>+</sup>  | C3H10NO4P             | 193.99793              | 193.99790             | 0.1  | 8.9E+04   |
| 84  | Ferulic acid                    | [M+H] <sup>+</sup>  | C10H10O4              | 195.06470              | 195.06519             | -2.5 | 3.5E+05   |
| 85  | Methyl-oxo-octanoic acid        | [M+Na] <sup>+</sup> | C9H16O3               | 195.09883              | 195.09917             | -1.7 | 4.4E+05   |
| 86  | Dihydroxy-octanoic acid         | [M+Na] <sup>+</sup> | C8H16O4               | 199.09410              | 199.09408             | 0.1  | 4.4E+05   |
| 87  | Ricinine                        | [M+K] <sup>+</sup>  | C8H8N2O2              | 203.02223              | 203.02174             | 2.4  | 4.4E+05   |
| 88  | Aminophenylalanine              | [M+Na] <sup>+</sup> | C9H12N2O2             | 203.07854              | 203.07910             | -2.7 | 3.0E+05   |
| 89  | Patchoula-diene                 | [M+H] <sup>+</sup>  | C15H22                | 203.17948              | 203.17943             | 0.3  | 1.6E+05   |
| 90  | Iridotrial                      | [M+Na] <sup>+</sup> | C10H14O3              | 205.08311              | 205.08352             | -2.0 | 2.2E+05   |
| 91  | Isocaryophyllene                | [M+H] <sup>+</sup>  | C15H24                | 205.19459              | 205.19508             | -2.4 | 1.3E+05   |
| 92  | Vanillic acid                   | [M+K] <sup>+</sup>  | C8H8O4                | 207.00601              | 207.00542             | 2.9  | 1.1E+05   |
| 93  | Oxo-decenoic acid               | [M+Na] <sup>+</sup> | C10H16O3              | 207.09873              | 207.09917             | -2.1 | 9.4E+05   |
| 94  | Trimethyluric acid              | [M+H] <sup>+</sup>  | C8H10N4O3             | 211.08243              | 211.08257             | -0.6 | 6.4E+05   |
| 95  | N'-Nitrosonornicotine           | [M+K] <sup>+</sup>  | C9H11N3O              | 216.05312              | 216.05337             | -1.2 | 8.8E+04   |
| 96  | Hydroxynicotine                 | [M+K] <sup>+</sup>  | C10H14N2O             | 217.07391              | 217.07377             | 0.6  | 1.1E+06   |
| 97  | Dicyclohexylamine               | [M+K] <sup>+</sup>  | C12H23N               | 220.14588              | 220.14621             | -1.5 | 8.6E+04   |
| 98  | Hydroxytryptophan               | [M+H] <sup>+</sup>  | C11H12N2O3            | 221.09208              | 221.09207             | 0.1  | 1.5E+05   |
| 99  | Linderic acid                   | [M+Na] <sup>+</sup> | C12H22O2              | 221.15179              | 221.15120             | 2.7  | 2.4E+05   |
| 100 | Decenedioic acid                | [M+Na] <sup>+</sup> | C10H16O4              | 223.09408              | 223.09408             | 0.0  | 1.2E+06   |
| 101 | Pelargonyl acetic acid          | [M+Na] <sup>+</sup> | C11H20O3              | 223.13066              | 223.13047             | 0.9  | 3.7E+05   |
| 102 | Sebacic acid                    | [M+Na] <sup>+</sup> | C10H18O4              | 225.10940              | 225.10973             | -1.5 | 1.5E+06   |
| 103 | Dodecatrynoic acid              | [M+K] <sup>+</sup>  | C12H12O2              | 227.04641              | 227.04689             | -2.1 | 5.1E+05   |
| 104 | Hydroxycotinine                 | [M+K] <sup>+</sup>  | C10H12N2O2            | 231.05236              | 231.05304             | -2.9 | 4.3E+05   |

Table S5: Untargeted metabolic profiling of Goji Berries leaves hydroalcoholic extracts by ESI(+) FT-ICR MS

| #   | Plausible compound <sup>a</sup>      | Ion                 | Molecular formula (M)                                         | Theo. m/z <sup>b</sup> | Exp. m/z <sup>c</sup> | ppm  | Intensity |
|-----|--------------------------------------|---------------------|---------------------------------------------------------------|------------------------|-----------------------|------|-----------|
| 105 | Ammodendrine                         | [M+Na] <sup>+</sup> | C <sub>12</sub> H <sub>20</sub> N <sub>2</sub> O              | 231.14676              | 231.14678             | -0.1 | 4.7E+05   |
| 106 | Tetradecadienol                      | [M+Na] <sup>+</sup> | C <sub>14</sub> H <sub>26</sub> O                             | 233.18786              | 233.18759             | 1.2  | 1.1E+05   |
| 107 | Acetoxychavicol acetate              | [M+H] <sup>+</sup>  | C <sub>13</sub> H <sub>14</sub> O <sub>4</sub>                | 235.09689              | 235.09649             | 1.7  | 1.6E+05   |
| 108 | Cucurbitic acid                      | [M+Na] <sup>+</sup> | C <sub>12</sub> H <sub>20</sub> O <sub>3</sub>                | 235.13007              | 235.13047             | -1.7 | 3.3E+05   |
| 109 | Hexadecatrienal                      | [M+H] <sup>+</sup>  | C <sub>16</sub> H <sub>26</sub> O                             | 235.20573              | 235.20564             | 0.4  | 2.6E+05   |
| 110 | Tridecanal                           | [M+K] <sup>+</sup>  | C <sub>13</sub> H <sub>26</sub> O                             | 237.16117              | 237.16152             | -1.5 | 3.4E+05   |
| 111 | Succinyl proline                     | [M+Na] <sup>+</sup> | C <sub>9</sub> H <sub>13</sub> NO <sub>5</sub>                | 238.06843              | 238.06859             | -0.7 | 2.0E+05   |
| 112 | N-Acetylserotonin                    | [M+Na] <sup>+</sup> | C <sub>12</sub> H <sub>14</sub> N <sub>2</sub> O <sub>2</sub> | 241.09480              | 241.09475             | 0.2  | 1.7E+05   |
| 113 | Isocaryophyllene                     | [M+K] <sup>+</sup>  | C <sub>15</sub> H <sub>24</sub>                               | 243.15117              | 243.15096             | 0.9  | 2.3E+05   |
| 114 | Hexadecatetraenoic acid              | [M+H] <sup>+</sup>  | C <sub>16</sub> H <sub>24</sub> O <sub>2</sub>                | 249.18455              | 249.18491             | -1.4 | 3.4E+05   |
| 115 | Dihydroxyphenylglycol O-sulfate      | [M+H] <sup>+</sup>  | C <sub>8</sub> H <sub>10</sub> O <sub>7</sub> S               | 251.02213              | 251.02200             | 0.5  | 3.8E+05   |
| 116 | Tyramine-O-sulfate                   | [M+K] <sup>+</sup>  | C <sub>8</sub> H <sub>11</sub> NO <sub>4</sub> S              | 256.00338              | 256.00404             | -2.6 | 1.0E+05   |
| 117 | Palmitic amide                       | [M+H] <sup>+</sup>  | C <sub>16</sub> H <sub>33</sub> NO                            | 256.26287              | 256.26349             | -2.4 | 8.8E+05   |
| 118 | Jasminine                            | [M+K] <sup>+</sup>  | C <sub>11</sub> H <sub>12</sub> N <sub>2</sub> O <sub>3</sub> | 259.04760              | 259.04795             | -1.4 | 4.4E+05   |
| 119 | Theacrine                            | [M+K] <sup>+</sup>  | C <sub>9</sub> H <sub>12</sub> N <sub>4</sub> O <sub>3</sub>  | 263.05359              | 263.05410             | -1.9 | 1.3E+05   |
| 120 | Tetradecadienoic acid                | [M+K] <sup>+</sup>  | C <sub>14</sub> H <sub>24</sub> O <sub>2</sub>                | 263.14119              | 263.14079             | 1.5  | 1.4E+05   |
| 121 | Acutifolane A                        | [M+H] <sup>+</sup>  | C <sub>16</sub> H <sub>22</sub> O <sub>3</sub>                | 263.16411              | 263.16417             | -0.2 | 2.4E+05   |
| 122 | Aminodeoxychorismate                 | [M+K] <sup>+</sup>  | C <sub>10</sub> H <sub>11</sub> NO <sub>5</sub>               | 264.02735              | 264.02688             | 1.8  | 1.2E+05   |
| 123 | Genipin                              | [M+K] <sup>+</sup>  | C <sub>11</sub> H <sub>14</sub> O <sub>5</sub>                | 265.04731              | 265.04728             | 0.1  | 1.4E+05   |
| 124 | Hydroxyfuranochalcone                | [M+H] <sup>+</sup>  | C <sub>17</sub> H <sub>12</sub> O <sub>3</sub>                | 265.08604              | 265.08592             | 0.5  | 1.6E+05   |
| 125 | Keto myristic acid                   | [M+Na] <sup>+</sup> | C <sub>14</sub> H <sub>26</sub> O <sub>3</sub>                | 265.17691              | 265.17742             | -1.9 | 4.8E+05   |
| 126 | Resveratrol                          | [M+K] <sup>+</sup>  | C <sub>14</sub> H <sub>12</sub> O <sub>3</sub>                | 267.04235              | 267.04180             | 2.0  | 2.2E+05   |
| 127 | Piceatannol                          | [M+Na] <sup>+</sup> | C <sub>14</sub> H <sub>12</sub> O <sub>4</sub>                | 267.06224              | 267.06278             | -2.0 | 2.2E+05   |
| 128 | Amino-tridecanoic acid               | [M+K] <sup>+</sup>  | C <sub>13</sub> H <sub>27</sub> NO <sub>2</sub>               | 268.16703              | 268.16734             | -1.2 | 4.6E+05   |
| 129 | Inosine                              | [M+H] <sup>+</sup>  | C <sub>10</sub> H <sub>12</sub> N <sub>4</sub> O <sub>5</sub> | 269.08749              | 269.08805             | -2.1 | 1.7E+05   |
| 130 | Oxo-pentyl-cyclopentanehexanoic acid | [M+H] <sup>+</sup>  | C <sub>16</sub> H <sub>28</sub> O <sub>3</sub>                | 269.21063              | 269.21112             | -1.8 | 1.1E+06   |

Table S5: Untargeted metabolic profiling of Goji Berries leaves hydroalcoholic extracts by ESI(+) FT-ICR MS

| #   | Plausible compound <sup>a</sup>         | Ion                 | Molecular formula (M) | Theo. m/z <sup>b</sup> | Exp. m/z <sup>c</sup> | ppm  | Intensity |
|-----|-----------------------------------------|---------------------|-----------------------|------------------------|-----------------------|------|-----------|
| 131 | Doxylamine                              | [M+H] <sup>+</sup>  | C17H22N2O             | 271.18078              | 271.18049             | 1.1  | 2.6E+05   |
| 132 | Axerophthene                            | [M+H] <sup>+</sup>  | C20H30                | 271.24219              | 271.24203             | 0.6  | 1.1E+06   |
| 133 | N-Feruloylglycine                       | [M+Na] <sup>+</sup> | C12H13NO5             | 274.06788              | 274.06859             | -2.6 | 1.1E+05   |
| 134 | Homoanserine                            | [M+Na] <sup>+</sup> | C11H18N4O3            | 277.12671              | 277.12711             | -1.4 | 2.0E+05   |
| 135 | Alhpa-tocopheronolactone                | [M+H] <sup>+</sup>  | C16H22O4              | 279.15948              | 279.15909             | 1.4  | 5.1E+05   |
| 136 | Decenoylcholine                         | [M+Na] <sup>+</sup> | C15H30NO2             | 279.21693              | 279.21687             | 0.2  | 1.7E+06   |
| 137 | Methyladenosine                         | [M+H] <sup>+</sup>  | C11H15N5O4            | 282.11984              | 282.11968             | 0.6  | 1.5E+05   |
| 138 | Amino-tetradecanoic acid                | [M+K] <sup>+</sup>  | C14H29NO2             | 282.18299              | 282.18299             | 0.0  | 3.7E+05   |
| 139 | Aminoadenosine                          | [M+H] <sup>+</sup>  | C10H14N6O4            | 283.11443              | 283.11493             | -1.8 | 8.0E+05   |
| 140 | Dehydroretinaldehyde                    | [M+H] <sup>+</sup>  | C20H26O               | 283.20607              | 283.20564             | 1.5  | 6.5E+05   |
| 141 | Hydroxy-heptadecen-ynoic acid           | [M+H] <sup>+</sup>  | C17H30O3              | 283.22656              | 283.22677             | -0.7 | 1.4E+06   |
| 142 | Ellipticine                             | [M+K] <sup>+</sup>  | C17H14N2              | 285.07910              | 285.07886             | 0.8  | 1.6E+05   |
| 143 | N2-(D-1-Carboxyethyl)-L-arginine        | [M+K] <sup>+</sup>  | C9H18N4O4             | 285.09579              | 285.09596             | -0.6 | 2.0E+05   |
| 144 | Cyclic bisphospho-D-glycerate           | [M+K] <sup>+</sup>  | C3H6O9P2              | 286.91245              | 286.91186             | 2.0  | 1.3E+05   |
| 145 | Inosine                                 | [M+Na] <sup>+</sup> | C10H12N4O5            | 291.07037              | 291.06999             | 1.3  | 2.5E+05   |
| 146 | Dihydroxyisoflavone                     | [M+K] <sup>+</sup>  | C15H10O4              | 293.02126              | 293.02107             | 0.7  | 1.6E+05   |
| 147 | Methano-retinal                         | [M+H] <sup>+</sup>  | C21H28O               | 297.22062              | 297.22129             | -2.3 | 6.0E+05   |
| 148 | Hydroxylinoleic acid                    | [M+H] <sup>+</sup>  | C18H32O3              | 297.24195              | 297.24242             | -1.6 | 1.5E+06   |
| 149 | Liriodenine                             | [M+Na] <sup>+</sup> | C17H9NO3              | 298.04670              | 298.04746             | -2.6 | 1.7E+05   |
| 150 | Dihydroxy-methylenedioxy-phenylcoumarin | [M+H] <sup>+</sup>  | C16H10O6              | 299.05530              | 299.05501             | 1.0  | 2.2E+05   |
| 151 | Ranunculin                              | [M+Na] <sup>+</sup> | C11H16O8              | 299.07348              | 299.07374             | -0.9 | 2.7E+05   |
| 152 | Apigenin dimethylether                  | [M+H] <sup>+</sup>  | C17H14O5              | 299.09216              | 299.09140             | 2.5  | 2.2E+05   |
| 153 | Thalassemine                            | [M+H] <sup>+</sup>  | C8H19N4O6P            | 299.11155              | 299.11150             | 0.2  | 2.5E+05   |
| 154 | Cryptophorine                           | [M+K] <sup>+</sup>  | C17H27NO              | 300.17187              | 300.17242             | -1.8 | 1.4E+05   |
| 155 | Sphingosine                             | [M+H] <sup>+</sup>  | C18H37NO2             | 300.28902              | 300.28971             | -2.3 | 2.5E+05   |
| 156 | Alhpa-tocopheronolactone                | [M+Na] <sup>+</sup> | C16H22O4              | 301.14082              | 301.14103             | -0.7 | 6.1E+06   |

Table S5: Untargeted metabolic profiling of Goji Berries leaves hydroalcoholic extracts by ESI(+) FT-ICR MS

| #   | Plausible compound <sup>a</sup>        | Ion                 | Molecular formula (M) | Theo. m/z <sup>b</sup> | Exp. m/z <sup>c</sup> | ppm  | Intensity |
|-----|----------------------------------------|---------------------|-----------------------|------------------------|-----------------------|------|-----------|
| 157 | Xylobiose                              | [M+Na] <sup>+</sup> | C10H18O9              | 305.08461              | 305.08430             | 1.0  | 3.3E+05   |
| 158 | Matricin                               | [M+H] <sup>+</sup>  | C17H22O5              | 307.15421              | 307.15400             | 0.7  | 4.8E+05   |
| 159 | Cinnamodial                            | [M+H] <sup>+</sup>  | C17H24O5              | 309.16884              | 309.16965             | -2.6 | 4.1E+05   |
| 160 | Hydroxy-(methoxyphenyl)-propylcoumarin | [M+H] <sup>+</sup>  | C19H18O4              | 311.12791              | 311.12779             | 0.4  | 1.7E+05   |
| 161 | Dihydroxy palmitic acid                | [M+Na] <sup>+</sup> | C16H32O4              | 311.21851              | 311.21928             | -2.5 | 2.3E+05   |
| 162 | Dodecanoyl-sn-glycerol                 | [M+K] <sup>+</sup>  | C15H30O4              | 313.17754              | 313.17757             | -0.1 | 4.6E+05   |
| 163 | Dehydrophytosphingosine                | [M+H] <sup>+</sup>  | C18H37NO3             | 316.28529              | 316.28462             | 2.1  | 5.5E+05   |
| 164 | Tuliposide B                           | [M+Na] <sup>+</sup> | C11H18O9              | 317.08436              | 317.08430             | 0.2  | 4.1E+05   |
| 165 | Leukotriene A4                         | [M+H] <sup>+</sup>  | C20H30O3              | 319.22753              | 319.22677             | 2.4  | 8.1E+05   |
| 166 | Thalassemine                           | [M+Na] <sup>+</sup> | C8H19N4O6P            | 321.09276              | 321.09344             | -2.1 | 3.1E+05   |
| 167 | Prosafrinine                           | [M+K] <sup>+</sup>  | C17H33NO2             | 322.21380              | 322.21429             | -1.5 | 3.2E+05   |
| 168 | Dimethyl-phenyl-benzodipyrone          | [M+Na] <sup>+</sup> | C20H16O3              | 327.09895              | 327.09917             | -0.7 | 2.4E+05   |
| 169 | Megastachine                           | [M+H] <sup>+</sup>  | C20H29NO3             | 332.22150              | 332.22202             | -1.6 | 7.6E+05   |
| 170 | Hydroperoxy-octadecatrienoic acid      | [M+Na] <sup>+</sup> | C18H30O4              | 333.20397              | 333.20363             | 1.0  | 3.8E+05   |
| 171 | Jatrophone                             | [M+Na] <sup>+</sup> | C20H24O3              | 335.16155              | 335.16177             | -0.6 | 2.6E+06   |
| 172 | Hydroperoxy-eicosadienoic acid         | [M+H] <sup>+</sup>  | C20H36O4              | 341.26835              | 341.26864             | -0.8 | 1.5E+06   |
| 173 | Gynocardin                             | [M+K] <sup>+</sup>  | C12H17NO8             | 342.05934              | 342.05858             | 2.2  | 2.3E+05   |
| 174 | N-[(Indolyl)acetyl]-L-lysine           | [M+K] <sup>+</sup>  | C16H21N3O3            | 342.12047              | 342.12145             | -2.9 | 1.9E+05   |
| 175 | Catechin methyl ether                  | [M+K] <sup>+</sup>  | C16H16O6              | 343.05884              | 343.05785             | 2.9  | 2.0E+05   |
| 176 | Tetramethoxyflavanone                  | [M+H] <sup>+</sup>  | C19H20O6              | 345.13257              | 345.13326             | -2.0 | 4.7E+05   |
| 177 | Gingerol                               | [M+Na] <sup>+</sup> | C19H30O4              | 345.20415              | 345.20363             | 1.5  | 4.7E+05   |
| 178 | Cularimine                             | [M+Na] <sup>+</sup> | C19H21NO4             | 350.13526              | 350.13628             | -2.9 | 2.1E+05   |
| 179 | Crocetin                               | [M+Na] <sup>+</sup> | C20H24O4              | 351.15710              | 351.15668             | 1.2  | 3.7E+05   |
| 180 | PC(O-2:0/O-2:0)                        | [M+K] <sup>+</sup>  | C12H28NO6P            | 352.12877              | 352.12858             | 0.5  | 3.0E+05   |
| 181 | Capnine                                | [M+H] <sup>+</sup>  | C17H37NO4S            | 352.25059              | 352.25161             | -2.9 | 1.7E+05   |
| 182 | Leukotriene B4                         | [M+Na] <sup>+</sup> | C20H32O4              | 359.22033              | 359.21928             | 2.9  | 3.6E+05   |

Table S5: Untargeted metabolic profiling of Goji Berries leaves hydroalcoholic extracts by ESI(+) FT-ICR MS

| #   | Plausible compound <sup>a</sup>              | Ion                 | Molecular formula (M) | Theo. m/z <sup>b</sup> | Exp. m/z <sup>c</sup> | ppm  | Intensity |
|-----|----------------------------------------------|---------------------|-----------------------|------------------------|-----------------------|------|-----------|
| 183 | PC(O-5:0/0:0)                                | [M+K] <sup>+</sup>  | C13H30NO6P            | 366.14511              | 366.14423             | 2.4  | 5.5E+05   |
| 184 | Keto-decanoylcarnitine                       | [M+K] <sup>+</sup>  | C17H31NO5             | 368.18283              | 368.18338             | -1.5 | 3.2E+05   |
| 185 | Dihydroxy-trimethoxyflavanone                | [M+Na] <sup>+</sup> | C18H18O7              | 369.09401              | 369.09447             | -1.3 | 3.3E+05   |
| 186 | Alpha-dihydroxy-pentanorcholecalciferol      | [M+Na] <sup>+</sup> | C22H34O3              | 369.23898              | 369.24002             | -2.8 | 9.3E+05   |
| 187 | Carnosic acid                                | [M+K] <sup>+</sup>  | C20H28O4              | 371.16228              | 371.16192             | 1.0  | 2.1E+05   |
| 188 | Gibberellin A2                               | [M+Na] <sup>+</sup> | C19H26O6              | 373.16176              | 373.16216             | -1.1 | 1.7E+05   |
| 189 | Usaramine                                    | [M+Na] <sup>+</sup> | C18H25NO6             | 374.15773              | 374.15741             | 0.9  | 1.8E+05   |
| 190 | Coumestrol diacetate                         | [M+Na] <sup>+</sup> | C19H12O7              | 375.04781              | 375.04752             | 0.8  | 8.8E+05   |
| 191 | Vincamine                                    | [M+Na] <sup>+</sup> | C21H26N2O3            | 377.18285              | 377.18356             | -1.9 | 2.5E+05   |
| 192 | MG(0:0/18:2/0:0)                             | [M+Na] <sup>+</sup> | C21H38O4              | 377.26699              | 377.26623             | 2.0  | 1.7E+05   |
| 193 | Reduced riboflavin                           | [M+H] <sup>+</sup>  | C17H22N4O6            | 379.16018              | 379.16121             | -2.7 | 3.0E+06   |
| 194 | Docosanoic acid                              | [M+K] <sup>+</sup>  | C22H44O2              | 379.29650              | 379.29729             | -2.1 | 3.3E+05   |
| 195 | MG(0:0/20:2/0:0)                             | [M+H] <sup>+</sup>  | C23H42O4              | 383.31489              | 383.31559             | -1.8 | 2.3E+06   |
| 196 | Isopentenyladenine-9-N-glucoside             | [M+Na] <sup>+</sup> | C17H25N5O4            | 386.18020              | 386.17988             | 0.8  | 2.1E+05   |
| 197 | Leukotriene B4 dimethylamide                 | [M+Na] <sup>+</sup> | C22H37NO3             | 386.26682              | 386.26656             | 0.7  | 2.0E+05   |
| 198 | Cinnamoyl-dihydro-dihydroxy-phenylcoumarin   | [M+H] <sup>+</sup>  | C24H18O5              | 387.12235              | 387.12270             | -0.9 | 1.9E+05   |
| 199 | Gibberellin A28                              | [M+H] <sup>+</sup>  | C20H26O8              | 395.17002              | 395.17004             | -0.1 | 5.5E+05   |
| 200 | O-Demethyl-O-deacetylvindoline               | [M+H] <sup>+</sup>  | C22H28N2O5            | 401.20661              | 401.20710             | -1.2 | 3.5E+05   |
| 201 | Tetradecenoylcarnitine                       | [M+K] <sup>+</sup>  | C21H39NO4             | 408.25086              | 408.25107             | -0.5 | 3.2E+05   |
| 202 | Dihydroxy-methoxy-(methylbutyryloxy)chalcone | [M+K] <sup>+</sup>  | C21H22O6              | 409.10533              | 409.10480             | 1.3  | 2.5E+05   |
| 203 | Hydroxy-hexacosanoic acid                    | [M+H] <sup>+</sup>  | C26H52O3              | 413.39931              | 413.39892             | 0.9  | 1.2E+06   |
| 204 | N-stearoyl taurine                           | [M+Na] <sup>+</sup> | C20H41NO4S            | 414.26543              | 414.26485             | 1.4  | 9.1E+05   |
| 205 | Tetrahydroxy-trimethoxyflavone               | [M+K] <sup>+</sup>  | C18H16O9              | 415.04179              | 415.04259             | -1.9 | 2.0E+05   |
| 206 | 8-C-p-Hydroxybenzylkaempferol                | [M+Na] <sup>+</sup> | C22H16O7              | 415.07766              | 415.07882             | -2.8 | 2.5E+05   |
| 207 | Hexanoyl-alpha-glucopyranose                 | [M+K] <sup>+</sup>  | C18H32O8              | 415.17378              | 415.17288             | 2.2  | 3.4E+05   |
| 208 | Hyaluronic acid                              | [M+H] <sup>+</sup>  | C16H27NO12            | 426.16085              | 426.16060             | 0.6  | 3.0E+05   |

Table S5: Untargeted metabolic profiling of Goji Berries leaves hydroalcoholic extracts by ESI(+) FT-ICR MS

| #   | Plausible compound <sup>a</sup>                  | Ion                 | Molecular formula (M) | Theo. m/z <sup>b</sup> | Exp. m/z <sup>c</sup> | ppm  | Intensity |
|-----|--------------------------------------------------|---------------------|-----------------------|------------------------|-----------------------|------|-----------|
| 209 | Geranylchrysin                                   | [M+K] <sup>+</sup>  | C25H26O4              | 429.14577              | 429.14627             | -1.2 | 3.1E+05   |
| 210 | Rehmanioside A                                   | [M+K] <sup>+</sup>  | C19H34O8              | 429.18883              | 429.18853             | 0.7  | 2.9E+05   |
| 211 | Calcitriol                                       | [M+Na] <sup>+</sup> | C27H44O3              | 439.31921              | 439.31827             | 2.1  | 3.1E+05   |
| 212 | Lamioside                                        | [M+Na] <sup>+</sup> | C18H28O11             | 443.15149              | 443.15238             | -2.0 | 2.7E+05   |
| 213 | Lauryl oleate                                    | [M+Na] <sup>+</sup> | C28H54O2              | 445.40120              | 445.40160             | -0.9 | 2.4E+05   |
| 214 | Hydroxy-gama-tocotrienol                         | [M+Na] <sup>+</sup> | C28H42O3              | 449.30138              | 449.30262             | -2.8 | 3.8E+05   |
| 215 | Triacotadienoic acid                             | [M+H] <sup>+</sup>  | C30H56O2              | 449.43464              | 449.43531             | -1.5 | 3.1E+05   |
| 216 | Catechin-O-(hydroxy-oxo-cyclohexene-carboxylate) | [M+Na] <sup>+</sup> | C22H20O9              | 451.10113              | 451.09995             | 2.6  | 1.6E+05   |
| 217 | MG(0:0/22:0/0:0)                                 | [M+K] <sup>+</sup>  | C25H50O4              | 453.33412              | 453.33407             | 0.1  | 2.1E+05   |
| 218 | PC(6:0/6:0)                                      | [M+H] <sup>+</sup>  | C20H40NO8P            | 454.25640              | 454.25643             | -0.1 | 1.7E+05   |
| 219 | PA(18:3/0:0)                                     | [M+Na] <sup>+</sup> | C21H37O7P             | 455.21705              | 455.21691             | 0.3  | 5.0E+05   |
| 220 | S-Octyl glutathione                              | [M+K] <sup>+</sup>  | C18H33N3O6S           | 458.17136              | 458.17217             | -1.8 | 1.8E+05   |
| 221 | PG(13:0/0:0)                                     | [M+Na] <sup>+</sup> | C19H39O9P             | 465.22227              | 465.22239             | -0.3 | 3.5E+05   |
| 222 | PA(20:0/0:0)                                     | [M+H] <sup>+</sup>  | C23H47O7P             | 467.31456              | 467.31322             | 2.9  | 2.8E+05   |
| 223 | Hexadecanedioic acid mono-carnitine ester        | [M+K] <sup>+</sup>  | C23H43NO6             | 468.27229              | 468.27220             | 0.2  | 2.3E+05   |
| 224 | TG(8:0/8:0/8:0)                                  | [M+H] <sup>+</sup>  | C27H50O6              | 471.36742              | 471.36802             | -1.3 | 3.3E+06   |
| 225 | PA(19:1/0:0)                                     | [M+Na] <sup>+</sup> | C22H43O7P             | 473.26319              | 473.26386             | -1.4 | 3.5E+05   |
| 226 | PE(O-16:0/0:0)                                   | [M+K] <sup>+</sup>  | C21H46NO6P            | 478.26919              | 478.26943             | -0.5 | 2.5E+05   |
| 227 | PC(P-16:0/0:0)                                   | [M+H] <sup>+</sup>  | C24H50NO6P            | 480.34583              | 480.34485             | 2.0  | 2.0E+05   |
| 228 | Alpha-dihydroxyvitamin D3-lactone                | [M+K] <sup>+</sup>  | C27H40O5              | 483.25178              | 483.25073             | 2.2  | 3.5E+05   |
| 229 | Hydroxy-alpha-tocopherol                         | [M+K] <sup>+</sup>  | C29H50O3              | 485.33904              | 485.33915             | -0.2 | 2.0E+05   |
| 230 | PE(17:2/0:0)                                     | [M+Na] <sup>+</sup> | C22H42NO7P            | 486.26041              | 486.25911             | 2.7  | 2.2E+05   |
| 231 | Dracorubin                                       | [M+H] <sup>+</sup>  | C32H24O5              | 489.17035              | 489.16965             | 1.4  | 1.8E+05   |
| 232 | Sophoraisoflavanone D                            | [M+H] <sup>+</sup>  | C30H36O6              | 493.25915              | 493.25847             | 1.4  | 2.0E+05   |
| 233 | Spinolic acid A                                  | [M+Na] <sup>+</sup> | C30H48O4              | 495.34301              | 495.34448             | -3.0 | 1.2E+05   |

Table S5: Untargeted metabolic profiling of Goji Berries leaves hydroalcoholic extracts by ESI(+) FT-ICR MS

| #   | Plausible compound <sup>a</sup>                    | Ion                 | Molecular formula (M) | Theo. m/z <sup>b</sup> | Exp. m/z <sup>c</sup> | ppm  | Intensity |
|-----|----------------------------------------------------|---------------------|-----------------------|------------------------|-----------------------|------|-----------|
| 234 | Cucurbitacin S                                     | [M+H] <sup>+</sup>  | C30H42O6              | 499.30587              | 499.30542             | 0.9  | 1.2E+05   |
| 235 | Tetradecahydrolycopene                             | [M+H] <sup>+</sup>  | C40H52                | 533.41410              | 533.41418             | -0.1 | 1.2E+05   |
| 236 | UDP-amino-deoxy-arabinose                          | [M+H] <sup>+</sup>  | C14H23N3O15P2         | 536.06816              | 536.06772             | 0.8  | 1.2E+05   |
| 237 | Iridodial glucoside tetraacetate                   | [M+K] <sup>+</sup>  | C24H34O11             | 537.17452              | 537.17327             | 2.3  | 9.5E+04   |
| 238 | PC(16:0/2:0)                                       | [M+H] <sup>+</sup>  | C26H52NO8P            | 538.35120              | 538.35033             | 1.6  | 1.3E+05   |
| 239 | Dimethylpyraono-kaempferol-methyl ether-rhamnoside | [M+K] <sup>+</sup>  | C27H28O10             | 551.13035              | 551.13141             | -1.9 | 8.3E+04   |
| 240 | Flavonol-O-D-xylosylglucoside                      | [M+Na] <sup>+</sup> | C26H28O12             | 555.14769              | 555.14730             | 0.7  | 1.3E+05   |
| 241 | Cucurbitacin D                                     | [M+K] <sup>+</sup>  | C30H44O7              | 555.27127              | 555.27186             | -1.1 | 7.3E+04   |
| 242 | PC(18:3/0:0)                                       | [M+K] <sup>+</sup>  | C26H48NO7P            | 556.27907              | 556.28000             | -1.7 | 8.4E+04   |
| 243 | PI(O-16:0/0:0)                                     | [M+H] <sup>+</sup>  | C25H51O11P            | 559.32376              | 559.32418             | -0.7 | 9.8E+04   |
| 244 | Flavonol-O-D-xylosylglucoside                      | [M+K] <sup>+</sup>  | C26H28O12             | 571.12178              | 571.12124             | 1.0  | 2.0E+05   |
| 245 | Myristinin A                                       | [M+Na] <sup>+</sup> | C33H40O7              | 571.26543              | 571.26662             | -2.1 | 1.1E+05   |
| 246 | Cer(d18:2/16:0)                                    | [M+K] <sup>+</sup>  | C34H65NO3             | 574.45851              | 574.45960             | -1.9 | 8.4E+04   |
| 247 | Hydroxy-b,e-caroten-one                            | [M+Na] <sup>+</sup> | C40H54O2              | 589.40311              | 589.40160             | 2.6  | 9.7E+04   |
| 248 | Celapanine                                         | [M+K] <sup>+</sup>  | C30H35NO10            | 608.19095              | 608.18926             | 2.8  | 1.2E+05   |
| 249 | Peonidin-(p-coumarylglucoside)                     | [M+H] <sup>+</sup>  | C31H29O13             | 610.16887              | 610.16809             | 1.3  | 9.9E+04   |
| 250 | Isorhamnetin-glucuronide-sulfate                   | [M+K] <sup>+</sup>  | C22H20O16S            | 611.01158              | 611.01037             | 2.0  | 9.6E+04   |
| 251 | PA(14:1/14:1)                                      | [M+Na] <sup>+</sup> | C31H57O8P             | 611.36982              | 611.36833             | 2.4  | 8.6E+04   |
| 252 | Myricetin-(galloylrhamnoside)                      | [M+H] <sup>+</sup>  | C28H24O16             | 617.11284              | 617.11371             | -1.4 | 1.5E+05   |
| 253 | Naringenin-(p-Coumaroylglucoside)                  | [M+K] <sup>+</sup>  | C30H28O12             | 619.12272              | 619.12124             | 2.4  | 9.3E+04   |
| 254 | PI(P-18:0/0:0)                                     | [M+K] <sup>+</sup>  | C27H53O11P            | 623.29645              | 623.29571             | 1.2  | 1.1E+05   |
| 255 | Kanokoside D                                       | [M+H] <sup>+</sup>  | C27H44O16             | 625.26971              | 625.27021             | -0.8 | 7.5E+04   |
| 256 | Pelargonidin 3-O-O-dimalonylglucoside              | [M+Na] <sup>+</sup> | C27H25O16             | 628.10241              | 628.10348             | -1.7 | 9.4E+04   |
| 257 | Calebassone                                        | [M+K] <sup>+</sup>  | C40H48N4O2            | 655.34228              | 655.34089             | 2.1  | 8.1E+04   |
| 258 | DG(18:3/22:6/0:0)                                  | [M+H] <sup>+</sup>  | C43H66O5              | 663.49712              | 663.49830             | -1.8 | 8.2E+04   |



Table S5: Untargeted metabolic profiling of Goji Berries leaves hydroalcoholic extracts by ESI(+) FT-ICR MS

| #   | Plausible compound <sup>a</sup>                                                    | Ion                 | Molecular formula (M) | Theo. m/z <sup>b</sup> | Exp. m/z <sup>c</sup> | ppm  | Intensity |
|-----|------------------------------------------------------------------------------------|---------------------|-----------------------|------------------------|-----------------------|------|-----------|
| 259 | PA(O-18:0/14:0)                                                                    | [M+K] <sup>+</sup>  | C35H71O7P             | 673.45549              | 673.45690             | -2.1 | 7.2E+04   |
| 260 | PG(12:0/13:0)                                                                      | [M+K] <sup>+</sup>  | C31H64NO10P           | 680.39196              | 680.38994             | 3.0  | 8.8E+04   |
| 261 | PE(15:0/P-16:0)                                                                    | [M+Na] <sup>+</sup> | C36H72NO7P            | 684.49317              | 684.49386             | -1.0 | 7.9E+04   |
| 262 | Pelargonidin-O-[O-(beta-D-xylopyranosyl)O-(methyl-malonyl)-bata-galactopyranoside] | [M+Na] <sup>+</sup> | C30H33O17             | 688.16224              | 688.16100             | 1.8  | 7.2E+04   |
| 263 | Quercetin-(diacetylramnosyl)-glucoside                                             | [M+H] <sup>+</sup>  | C31H34O18             | 695.18166              | 695.18179             | -0.2 | 7.6E+04   |
| 264 | PE(15:0/16:0)                                                                      | [M+Na] <sup>+</sup> | C36H72NO8P            | 700.48874              | 700.48878             | -0.1 | 1.0E+05   |
| 265 | DG(22:6/22:6/0:0)                                                                  | [M+H] <sup>+</sup>  | C47H68O5              | 713.51458              | 713.51395             | 0.9  | 1.2E+05   |
| 266 | PS(14:1/16:1)                                                                      | [M+Na] <sup>+</sup> | C36H66NO10P           | 726.43084              | 726.43165             | -1.1 | 1.3E+05   |
| 267 | PA(O-16:0/20:1)                                                                    | [M+K] <sup>+</sup>  | C39H77O7P             | 727.50523              | 727.50385             | 1.9  | 1.8E+06   |
| 268 | Methyltetrahydropteroyltri-glutamate                                               | [M+Na] <sup>+</sup> | C30H39N9O12           | 740.26013              | 740.26104             | -1.2 | 1.4E+05   |
| 269 | DG(18:0/24:1/0:0)                                                                  | [M+K] <sup>+</sup>  | C45H86O5              | 745.61254              | 745.61069             | 2.5  | 1.3E+05   |
| 270 | Quercetin-(xylosylrutinoside)                                                      | [M+Na] <sup>+</sup> | C32H38O20             | 765.18550              | 765.18486             | 0.8  | 9.0E+04   |
| 271 | PE(18:1/P-18:1)                                                                    | [M+K] <sup>+</sup>  | C41H78NO7P            | 766.51249              | 766.51475             | -2.9 | 1.0E+05   |
| 272 | PE(14:0/24:1(15Z))                                                                 | [M+H] <sup>+</sup>  | C43H84NO8P            | 774.59922              | 774.60073             | -2.0 | 7.8E+04   |
| 273 | Cyanidin-(caffeylsambubioside)                                                     | [M+K] <sup>+</sup>  | C35H35O18             | 782.14549              | 782.14550             | 0.0  | 1.6E+05   |
| 274 | PG(16:0/18:1)                                                                      | [M+K] <sup>+</sup>  | C40H80NO10P           | 804.51458              | 804.51514             | -0.7 | 1.0E+05   |
| 275 | PS(18:1/20:4)]                                                                     | [M+H] <sup>+</sup>  | C44H76NO10P           | 810.52702              | 810.52796             | -1.2 | 7.8E+04   |
| 276 | PG(O-18:0/22:4)                                                                    | [M+H] <sup>+</sup>  | C46H85O9P             | 813.59978              | 813.60040             | -0.8 | 8.1E+04   |
| 277 | PE(18:0/22:4)                                                                      | [M+Na] <sup>+</sup> | C45H82NO8P            | 818.56804              | 818.56703             | 1.2  | 1.1E+05   |
| 278 | Laricitrin-rutinoside-glucoside                                                    | [M+H] <sup>+</sup>  | C34H44O23             | 821.23499              | 821.23461             | 0.5  | 1.2E+05   |
| 279 | PG(18:3/22:6)                                                                      | [M+Na] <sup>+</sup> | C46H73O10P            | 839.48282              | 839.48336             | -0.6 | 7.9E+04   |
| 280 | PS(22:1/22:6)                                                                      | [M+Na] <sup>+</sup> | C50H84NO10P           | 912.57280              | 912.57251             | 0.3  | 1.3E+05   |
| 281 | Hydroxyphenylacetyl-CoA                                                            | [M+Na] <sup>+</sup> | C29H42N7O18P3S        | 924.14343              | 924.14121             | 2.4  | 9.5E+04   |
| 282 | Kaempferol-neohesperidoside-(ferulylglucoside)                                     | [M+H] <sup>+</sup>  | C43H48O23             | 933.26759              | 933.26591             | 1.8  | 1.6E+05   |
| 283 | TG(17:1/20:5/20:5)                                                                 | [M+Na] <sup>+</sup> | C60H94O6              | 933.69312              | 933.69426             | -1.2 | 9.8E+04   |

Table S5: Untargeted metabolic profiling of Goji Berries leaves hydroalcoholic extracts by ESI(+) FT-ICR MS

| #   | Plausible compound <sup>a</sup> | Ion                 | Molecular formula (M)                                          | Theo. m/z <sup>b</sup> | Exp. m/z <sup>c</sup> | ppm  | Intensity |
|-----|---------------------------------|---------------------|----------------------------------------------------------------|------------------------|-----------------------|------|-----------|
| 284 | PI(17:1/22:4)                   | [M+K] <sup>+</sup>  | C <sub>48</sub> H <sub>83</sub> O <sub>13</sub> P              | 937.52204              | 937.52029             | 1.9  | 1.2E+05   |
| 285 | PC(22:4/24:0)                   | [M+K] <sup>+</sup>  | C <sub>54</sub> H <sub>100</sub> NO <sub>8</sub> P             | 960.68144              | 960.68182             | -0.4 | 1.3E+05   |
| 286 | PIP(16:0/20:2)                  | [M+Na] <sup>+</sup> | C <sub>45</sub> H <sub>84</sub> O <sub>16</sub> P <sub>2</sub> | 965.51160              | 965.51268             | -1.1 | 1.1E+05   |

a MG Monoacylglycerol; DG Diacylglycerol; TG Triacylglycerol; GalCer Galactosylceramide; PA Phosphatidic acid; PC Phosphatidylcholine; PE Phosphatidylethanolamine; PG Glycerophospholipids; PI Phosphatidylinositol; PS Phosphatidylserine; SQMG Glycosylmonoacylglycerols; DHAP Dihydroxyacetone phosphate; DNP Dinitrophenyl

b Theoretical m/z

c experimental m/z

Table S6: Untargeted metabolic profiling of Goji Berries leaves hydroalcoholic extracts by ESI(-) FT-ICR MS

| #  | Putative Annotation <sup>a</sup>       | Ion     | Molecular formula (M) | Theo. m/z <sup>b</sup> | Exp. m/z <sup>c</sup> | ppm  | Intensity |
|----|----------------------------------------|---------|-----------------------|------------------------|-----------------------|------|-----------|
| 1  | 1,4-Lactone                            | [M-H]-  | C4H6O2                | 85.02950               | 85.02974              | 2.8  | 1.5E+06   |
| 2  | Glycerol                               | [M-H]-  | C3H8O3                | 91.04007               | 91.04018              | 1.2  | 1.2E+06   |
| 3  | Cyclopropylamine                       | [M+Cl]- | C3H7N                 | 92.02725               | 92.02736              | 1.2  | 1.1E+06   |
| 4  | Sulfate                                | [M-H]-  | H2SO4                 | 96.96010               | 96.96006              | -0.4 | 1.6E+06   |
| 5  | Succinimide                            | [M-H]-  | C4H5NO2               | 98.02475               | 98.02463              | -1.2 | 1.9E+06   |
| 6  | Hexylamine                             | [M-H]-  | C6H15N                | 100.11317              | 100.11347             | 3.0  | 1.2E+06   |
| 7  | Benzaldehyde                           | [M-H]-  | C7H6O                 | 105.03459              | 105.03452             | -0.7 | 1.0E+06   |
| 8  | 1-Butanol                              | [M+Cl]- | C4H10O                | 109.04257              | 109.04288             | 2.9  | 1.3E+06   |
| 9  | Piperidine                             | [M+Cl]- | C5H11N                | 120.05855              | 120.05824             | -2.6 | 1.8E+06   |
| 10 | Oxalic acid                            | [M+Cl]- | C2H2O4                | 124.96471              | 124.96455             | -1.3 | 1.1E+06   |
| 11 | Dihydrothymine                         | [M-H]-  | C5H8N2O2              | 127.05130              | 127.05110             | -1.6 | 6.2E+06   |
| 12 | Oxaloacetate                           | [M-H]-  | C4H4O5                | 130.99860              | 130.99882             | 1.7  | 1.7E+06   |
| 13 | L-Asparagine                           | [M-H]-  | C4H8N2O3              | 131.04622              | 131.04617             | -0.3 | 1.4E+06   |
| 14 | (S)-Malate                             | [M-H]-  | C4H6O5                | 133.01425              | 133.01436             | 0.9  | 1.7E+06   |
| 15 | Cinnamyl alcohol                       | [M-H]-  | C9H10O                | 133.06589              | 133.06572             | -1.3 | 1.7E+06   |
| 16 | Tyramine                               | [M-H]-  | C8H11NO               | 136.07679              | 136.07656             | -1.7 | 1.2E+06   |
| 17 | Salicylic acid                         | [M-H]-  | C7H6O3                | 137.02442              | 137.02468             | 1.9  | 1.8E+06   |
| 18 | cis-4-Carboxymethylenebut-2-en-4-olide | [M-H]-  | C6H4O4                | 139.00368              | 139.00405             | 2.6  | 1.2E+06   |
| 19 | 4Z,7-octadienoic acid                  | [M-H]-  | C8H12O2               | 139.07645              | 139.07681             | 2.6  | 3.4E+06   |
| 20 | 2E-Nonen-1-ol                          | [M-H]-  | C9H18O                | 141.12849              | 141.12862             | 0.9  | 3.8E+06   |
| 21 | 2,3-Dimethylmaleate                    | [M-H]-  | C6H8O4                | 143.03498              | 143.03468             | -2.1 | 1.2E+06   |
| 22 | L-Lysine                               | [M-H]-  | C6H14N2O2             | 145.09825              | 145.09843             | 1.2  | 1.7E+06   |
| 23 | L-Glutamate                            | [M-H]-  | C5H9NO4               | 146.04588              | 146.04548             | -2.7 | 2.2E+06   |
| 24 | trans-Cinnamate                        | [M-H]-  | C9H8O2                | 147.04515              | 147.04552             | 2.5  | 1.4E+06   |
| 25 | cis-Acetylacrylate                     | [M+Cl]- | C5H6O3                | 149.00110              | 149.00126             | 1.1  | 1.4E+06   |
| 26 | Thiopurine                             | [M-H]-  | C5H4N4S               | 151.00839              | 151.00881             | 2.8  | 1.3E+06   |

Table S6: Untargeted metabolic profiling of Goji Berries leaves hydroalcoholic extracts by ESI(-) FT-ICR MS

| #  | Putative Annotation <sup>a</sup> | Ion     | Molecular formula (M) | Theo. m/z <sup>b</sup> | Exp. m/z <sup>c</sup> | ppm  | Intensity |
|----|----------------------------------|---------|-----------------------|------------------------|-----------------------|------|-----------|
| 27 | L-Arabitol                       | [M-H]-  | C5H12O5               | 151.06120              | 151.06163             | 2.9  | 2.0E+06   |
| 28 | L-Aspartate 4-semialdehyde       | [M+Cl]- | C4H7NO3               | 152.01199              | 152.01168             | -2.1 | 1.1E+06   |
| 29 | Succinate                        | [M+Cl]- | C4H6O4                | 152.99601              | 152.99609             | 0.5  | 1.2E+06   |
| 30 | Borneol                          | [M-H]-  | C10H18O               | 153.12849              | 153.12858             | 0.6  | 2.0E+06   |
| 31 | L-Histidine                      | [M-H]-  | C6H9N3O2              | 154.06220              | 154.06205             | -1.0 | 1.9E+06   |
| 32 | 2-methyl-octanoic acid           | [M-H]-  | C9H18O2               | 157.12340              | 157.12338             | -0.1 | 2.8E+06   |
| 33 | delta-Guanidinovaleric acid      | [M-H]-  | C6H13N3O2             | 158.09350              | 158.09329             | -1.3 | 1.9E+06   |
| 34 | 2-Propylsuccinic acid            | [M-H]-  | C7H12O4               | 159.06628              | 159.06607             | -1.3 | 1.9E+06   |
| 35 | Pyrogallol                       | [M+Cl]- | C6H6O3                | 161.00110              | 161.00151             | 2.6  | 2.3E+06   |
| 36 | Melamine                         | [M+Cl]- | C3H6N6                | 161.03480              | 161.03476             | -0.2 | 1.8E+06   |
| 37 | (R)-3,3-Dimethylmalate           | [M-H]-  | C6H10O5               | 161.04555              | 161.04598             | 2.7  | 1.3E+06   |
| 38 | Methyl cinnamate                 | [M-H]-  | C10H10O2              | 161.06080              | 161.06125             | 2.8  | 1.1E+06   |
| 39 | Nicotine                         | [M-H]-  | C10H14N2              | 161.10842              | 161.10828             | -0.9 | 1.3E+06   |
| 40 | 7-Methylxanthine                 | [M-H]-  | C6H6N4O2              | 165.04180              | 165.04219             | 2.4  | 9.7E+05   |
| 41 | L-Asparagine                     | [M+Cl]- | C4H8N2O3              | 167.02289              | 167.02318             | 1.7  | 1.6E+06   |
| 42 | Decanoic acid                    | [M-H]-  | C10H20O2              | 171.13905              | 171.13916             | 0.6  | 2.5E+06   |
| 43 | 5-Hydroxymethyluracil            | [M+Cl]- | C5H6N2O3              | 177.00724              | 177.00706             | -1.0 | 9.9E+05   |
| 44 | 7,8-Dihydroxycoumarin            | [M-H]-  | C9H6O4                | 177.01933              | 177.01925             | -0.5 | 9.6E+05   |
| 45 | O-Phospho-L-serine               | [M-H]-  | C3H8NO6P              | 184.00165              | 184.00120             | -2.4 | 9.2E+05   |
| 46 | 3-methyl-decanoic acid           | [M-H]-  | C11H22O2              | 185.15470              | 185.15498             | 1.5  | 9.5E+05   |
| 47 | 3-Isopropylcatechol              | [M+Cl]- | C9H12O2               | 187.05313              | 187.05329             | 0.8  | 8.7E+05   |
| 48 | Quinic acid                      | [M-H]-  | C7H12O6               | 191.05611              | 191.05603             | -0.4 | 1.6E+06   |
| 49 | Phthalate                        | [M+Cl]- | C8H6O4                | 200.99601              | 200.99646             | 2.2  | 1.1E+06   |
| 50 | Cysteic acid                     | [M+Cl]- | C3H7NO5S              | 203.97389              | 203.97422             | 1.6  | 1.1E+06   |
| 51 | Pantothenol                      | [M-H]-  | C9H19NO4              | 204.12413              | 204.12453             | 2.0  | 7.6E+05   |
| 52 | Gallic acid                      | [M+Cl]- | C7H6O5                | 204.99092              | 204.99056             | -1.8 | 2.5E+06   |

Table S6: Untargeted metabolic profiling of Goji Berries leaves hydroalcoholic extracts by ESI(-) FT-ICR MS

| #  | Putative Annotation <sup>a</sup>       | Ion     | Molecular formula (M) | Theo. m/z <sup>b</sup> | Exp. m/z <sup>c</sup> | ppm  | Intensity |
|----|----------------------------------------|---------|-----------------------|------------------------|-----------------------|------|-----------|
| 53 | Anthocyanin                            | [M-H]-  | C15H11O               | 206.07371              | 206.07395             | 1.1  | 7.3E+05   |
| 54 | decanamide                             | [M+Cl]- | C10H21NO              | 206.13172              | 206.13143             | -1.4 | 9.8E+05   |
| 55 | Menadione                              | [M+Cl]- | C11H8O2               | 207.02183              | 207.02236             | 2.6  | 6.8E+05   |
| 56 | 2-Octenedioic acid                     | [M+Cl]- | C8H12O4               | 207.04296              | 207.04298             | 0.1  | 1.1E+06   |
| 57 | L-Citrulline                           | [M+Cl]- | C6H13N3O3             | 210.06509              | 210.06559             | 2.4  | 1.0E+06   |
| 58 | (S)-6-Hydroxynicotine                  | [M+Cl]- | C10H14N2O             | 213.08001              | 213.07994             | -0.4 | 2.5E+06   |
| 59 | 3-Oxododecanoic acid                   | [M-H]-  | C12H22O3              | 213.14962              | 213.14964             | 0.1  | 7.5E+05   |
| 60 | 2-methyl lauric acid                   | [M-H]-  | C13H26O2              | 213.18600              | 213.18657             | 2.7  | 2.7E+06   |
| 61 | Succinyl proline                       | [M-H]-  | C9H13NO5              | 214.07210              | 214.07226             | 0.8  | 9.3E+05   |
| 62 | Caffeic acid                           | [M+Cl]- | C9H8O4                | 215.01166              | 215.01177             | 0.5  | 2.4E+06   |
| 63 | D-Glucose                              | [M+Cl]- | C6H12O6               | 215.03279              | 215.03219             | -2.8 | 1.1E+06   |
| 64 | Diisopropyl phosphate                  | [M+Cl]- | C6H15O4P              | 217.04020              | 217.04018             | -0.1 | 1.7E+06   |
| 65 | Myristoleic acid                       | [M-H]-  | C14H26O2              | 225.18600              | 225.18653             | 2.3  | 2.2E+06   |
| 66 | Tetradecanoic acid                     | [M-H]-  | C14H28O2              | 227.20165              | 227.20161             | -0.2 | 2.4E+07   |
| 67 | Phenylacetyl glycine                   | [M+Cl]- | C10H11NO3             | 228.04329              | 228.04308             | -0.9 | 1.2E+06   |
| 68 | Ferulic acid                           | [M+Cl]- | C10H10O4              | 229.02731              | 229.02754             | 1.0  | 2.1E+06   |
| 69 | 2-pentadecenoic acid                   | [M-H]-  | C15H28O2              | 239.20165              | 239.20188             | 0.9  | 3.0E+06   |
| 70 | Palmitic acid                          | [M-H]-  | C16H32O2              | 255.23295              | 255.23238             | -2.2 | 4.2E+07   |
| 71 | 5,8,11-heptadecatriynoic acid          | [M-H]-  | C17H22O2              | 257.15470              | 257.15431             | -1.5 | 9.0E+05   |
| 72 | Norlinolenic acid                      | [M-H]-  | C17H28O2              | 263.20165              | 263.20139             | -1.0 | 8.9E+05   |
| 73 | 7-methyl-6E-hexadecenoic acid          | [M-H]-  | C17H32O2              | 267.23295              | 267.23349             | 2.0  | 4.0E+06   |
| 74 | Oleic acid                             | [M-H]-  | C18H34O2              | 281.24860              | 281.24849             | -0.4 | 1.1E+07   |
| 75 | Stearic acid                           | [M-H]-  | C18H36O2              | 283.26425              | 283.26484             | 2.1  | 1.1E+07   |
| 76 | 14:4(2E,4E,8E,10E)(6Me[S],9Me,12Me[S]) | [M+Cl]- | C17H26O2              | 297.16268              | 297.16239             | -1.0 | 3.3E+06   |
| 77 | 3',4'-Dihydroxy-5,7-dimethoxyflavan    | [M-H]-  | C17H18O5              | 301.10815              | 301.10794             | -0.7 | 1.2E+06   |
| 78 | Stearidonic acid                       | [M+Cl]- | C18H28O2              | 311.17833              | 311.17894             | 2.0  | 2.3E+07   |

Table S6: Untargeted metabolic profiling of Goji Berries leaves hydroalcoholic extracts by ESI(-) FT-ICR MS

| #   | Putative Annotation <sup>a</sup>                               | Ion     | Molecular formula (M) | Theo. m/z <sup>b</sup> | Exp. m/z <sup>c</sup> | ppm  | Intensity |
|-----|----------------------------------------------------------------|---------|-----------------------|------------------------|-----------------------|------|-----------|
| 79  | 4-Oxo-13-cis-retinoate                                         | [M-H]-  | C20H25O3              | 312.17309              | 312.17395             | 2.7  | 4.9E+06   |
| 80  | N-Arachidonoyl glycine                                         | [M-H]-  | C22H35NO3             | 360.25442              | 360.25451             | 0.3  | 7.3E+05   |
| 81  | 5alpha-Androstan-17beta-ol propionate                          | [M+Cl]- | C22H36O2              | 367.24093              | 367.24188             | 2.6  | 6.3E+05   |
| 82  | Eicosanedioic acid                                             | [M+Cl]- | C20H38O4              | 377.24641              | 377.24636             | -0.1 | 5.1E+05   |
| 83  | 11,12-dihydroxy arachidic acid                                 | [M+Cl]- | C20H40O4              | 379.26206              | 379.26259             | 1.4  | 9.5E+05   |
| 84  | C17 Sphingosine-1-phosphate                                    | [M-H]-  | C17H39N2O5P           | 381.25238              | 381.25298             | 1.6  | 7.1E+05   |
| 85  | MG(0:0/18:1(11Z)/0:0)                                          | [M+Cl]- | C21H40O4              | 391.26206              | 391.26187             | -0.5 | 5.0E+05   |
| 86  | Campestanol                                                    | [M-H]-  | C28H50O               | 401.37889              | 401.37956             | 1.7  | 4.9E+05   |
| 87  | PG(18:1(9Z)/0:0)                                               | [M+Cl]- | C24H47O9P             | 545.26517              | 545.26418             | -1.8 | 1.9E+06   |
| 88  | PG(22:6(4Z,7Z,10Z,13Z,16Z,19Z)/0:0)                            | [M-H]-  | C28H45O9P             | 555.27284              | 555.27224             | -1.1 | 5.9E+07   |
| 89  | Delphinine                                                     | [M-H]-  | C33H45NO9             | 598.30216              | 598.30333             | 2.0  | 1.8E+06   |
| 90  | Kaempferol 7,4'-dimethyl ether 3-(6''-(E)-p-coumarylglucoside) | [M-H]-  | C32H30O13             | 621.16136              | 621.16067             | -1.1 | 1.1E+06   |
| 91  | DG(20:3(5Z,8Z,11Z)/22:6(4Z,7Z,10Z,13Z,16Z,19Z)/0:0)            | [M-H]-  | C45H70O5              | 689.51505              | 689.51579             | 1.1  | 1.0E+06   |
| 92  | PA(12:0/22:4(7Z,10Z,13Z,16Z))                                  | [M+Cl]- | C37H65O8P             | 703.41111              | 703.41134             | 0.3  | 5.4E+05   |
| 93  | SM(d18:1/16:0)                                                 | [M+Cl]- | C39H80N2O6P           | 738.54480              | 738.54573             | 1.3  | 6.6E+05   |
| 94  | PG(16:0/18:3(6Z,9Z,12Z))                                       | [M-H]-  | C40H73O10P            | 743.48686              | 743.48877             | 2.6  | 6.6E+05   |
| 95  | PC(15:0/18:0)                                                  | [M-H]-  | C41H82NO8P            | 746.57053              | 746.56881             | -2.3 | 7.0E+05   |
| 96  | GlcCer(d18:0/18:0)                                             | [M+Cl]- | C42H83NO8             | 764.58127              | 764.58294             | 2.2  | 6.1E+05   |
| 97  | PE(18:3(6Z,9Z,12Z)/22:6(4Z,7Z,10Z,13Z,16Z,19Z))                | [M+Cl]- | C45H72NO8P            | 820.46896              | 820.46806             | -1.1 | 1.1E+06   |
| 98  | PI(O-16:0/17:1(9Z))                                            | [M+Cl]- | C42H81O12P            | 843.51597              | 843.51552             | -0.5 | 7.0E+05   |
| 99  | PC(20:5(5Z,8Z,11Z,14Z,17Z)/24:1(15Z))                          | [M+Cl]- | C52H92NO8P            | 924.62546              | 924.62456             | -1.0 | 6.9E+05   |
| 100 | TG(17:1(9Z)/20:1(11Z)/20:1(11Z))[iso3]                         | [M-H]-  | C60H110O6             | 925.82296              | 925.82546             | 2.7  | 7.4E+05   |

<sup>a</sup> MG Monoacylglycerol; DG Diacylglycerol; TG Triacylglycerol; GalCer Galactosylceramide; PA Phosphatidic acid; PC Phosphatidylcholine; PE Phosphatidylethanolamine; PG Glycerophospholipids; PI Phosphatidylinositol; PS Phosphatidylserine; SQMG Glycosylmonoacylglycerols; DHAP Dihydroxyacetone phosphate; DNP Dinitrophenyl

Table S6: Untargeted metabolic profiling of Goji Berries leaves hydroalcoholic extracts by ESI(-) FT-ICR MS

| # | Putative Annotation <sup>a</sup> | Ion | Molecular formula (M) | Theo. m/z <sup>b</sup> | Exp. m/z <sup>c</sup> | ppm | Intensity |
|---|----------------------------------|-----|-----------------------|------------------------|-----------------------|-----|-----------|
|---|----------------------------------|-----|-----------------------|------------------------|-----------------------|-----|-----------|

b Theoretical m/z

c experimental m/z

Table S7: Untargeted metabolic profiling of Goji Berries leaves organic extracts by ESI(+) Ion Trap MS<sup>a</sup>

| #  | m/z   | Intensity | Putative Annotation <sup>b</sup> | Molecular formula (M)                                        | Ion                 |
|----|-------|-----------|----------------------------------|--------------------------------------------------------------|---------------------|
| 1  | 131.8 | 1.7E+03   | Leucine/Isoleucine               | C <sub>6</sub> H <sub>13</sub> NO <sub>2</sub>               | [M+H] <sup>+</sup>  |
| 2  | 140.1 | 5.1E+03   | Valine                           | C <sub>5</sub> H <sub>11</sub> NO <sub>2</sub>               | [M+Na] <sup>+</sup> |
| 3  | 156.1 | 5.7E+03   | Histidine                        | C <sub>6</sub> H <sub>9</sub> N <sub>3</sub> O <sub>2</sub>  | [M+H] <sup>+</sup>  |
| 4  | 160.1 | 1.5E+03   | Trigonelline                     | C <sub>7</sub> H <sub>7</sub> NO <sub>2</sub>                | [M+Na] <sup>+</sup> |
| 5  | 163.1 | 1.7E+03   | Dimethylmalic acid               | C <sub>6</sub> H <sub>10</sub> O <sub>5</sub>                | [M+H] <sup>+</sup>  |
| 6  | 164.1 | 1.5E+03   | S-(carboxypropyl)-Cysteamine     | C <sub>6</sub> H <sub>13</sub> NO <sub>2</sub> S             | [M+H] <sup>+</sup>  |
| 7  | 176.1 | 6.1E+03   | Citrulline                       | C <sub>6</sub> H <sub>13</sub> N <sub>3</sub> O <sub>3</sub> | [M+H] <sup>+</sup>  |
| 8  | 203.1 | 4.0E+03   | Aldohexose                       | C <sub>6</sub> H <sub>12</sub> O <sub>6</sub>                | [M+Na] <sup>+</sup> |
| 9  | 210.1 | 2.0E+03   | Butenyl-methyl-threonine         | C <sub>9</sub> H <sub>17</sub> NO <sub>3</sub>               | [M+Na] <sup>+</sup> |
| 10 | 219.1 | 1.7E+03   | Aldohexose                       | C <sub>6</sub> H <sub>12</sub> O <sub>6</sub>                | [M+K] <sup>+</sup>  |
| 11 | 229.1 | 1.6E+03   | Myristic acid                    | C <sub>14</sub> H <sub>28</sub> O <sub>2</sub>               | [M+H] <sup>+</sup>  |
| 12 | 244.9 | 2.0E+03   | L-Uridine                        | C <sub>9</sub> H <sub>12</sub> N <sub>2</sub> O <sub>6</sub> | [M+H] <sup>+</sup>  |
| 13 | 252.9 | 1.9E+03   | Dodecanedioic acid               | C <sub>12</sub> H <sub>22</sub> O <sub>4</sub>               | [M+Na] <sup>+</sup> |
| 14 | 260.9 | 1.9E+03   | Methoxychalcone                  | C <sub>16</sub> H <sub>14</sub> O <sub>2</sub>               | [M+Na] <sup>+</sup> |
| 15 | 270.9 | 1.6E+03   | Apigenin                         | C <sub>15</sub> H <sub>10</sub> O <sub>5</sub>               | [M+H] <sup>+</sup>  |
| 16 | 273.0 | 1.8E+03   | Naringenin                       | C <sub>15</sub> H <sub>12</sub> O <sub>5</sub>               | [M+H] <sup>+</sup>  |
| 17 | 277.0 | 3.7E+03   | Chrysanthetriol                  | C <sub>15</sub> H <sub>26</sub> O <sub>3</sub>               | [M+H] <sup>+</sup>  |
| 18 | 279.1 | 2.9E+03   | Palmitic Acid                    | C <sub>16</sub> H <sub>32</sub> O <sub>2</sub>               | [M+Na] <sup>+</sup> |
| 19 | 280.9 | 1.7E+03   | Apigeniflavan                    | C <sub>15</sub> H <sub>14</sub> O <sub>4</sub>               | [M+Na] <sup>+</sup> |
| 20 | 283.1 | 1.6E+03   | Oleic acid                       | C <sub>18</sub> H <sub>34</sub> O <sub>2</sub>               | [M+H] <sup>+</sup>  |
| 21 | 284.3 | 2.7E+03   | Stearamide                       | C <sub>18</sub> H <sub>37</sub> NO                           | [M+H] <sup>+</sup>  |
| 22 | 289.1 | 2.0E+03   | Dihydroretinol                   | C <sub>20</sub> H <sub>32</sub> O                            | [M+H] <sup>+</sup>  |
| 23 | 291.0 | 2.2E+03   | Catechin                         | C <sub>15</sub> H <sub>14</sub> O <sub>6</sub>               | [M+H] <sup>+</sup>  |
| 24 | 293.0 | 2.6E+03   | Apigenin                         | C <sub>15</sub> H <sub>10</sub> O <sub>5</sub>               | [M+Na] <sup>+</sup> |
| 25 | 295.0 | 2.2E+03   | Hydroxylinolenic acid            | C <sub>18</sub> H <sub>30</sub> O <sub>3</sub>               | [M+H] <sup>+</sup>  |
| 26 | 297.1 | 2.1E+03   | Hydroxy-octadecadienoic acid     | C <sub>18</sub> H <sub>32</sub> O <sub>3</sub>               | [M+H] <sup>+</sup>  |



Table S7: Untargeted metabolic profiling of Goji Berries leaves organic extracts by ESI(+) Ion Trap MS<sup>a</sup>

| #  | m/z   | Intensity | Putative Annotation <sup>b</sup> | Molecular formula (M) | Ion                 |
|----|-------|-----------|----------------------------------|-----------------------|---------------------|
| 27 | 299.1 | 2.0E+03   | Oxo-octadecanoic acid            | C18H34O3              | [M+H] <sup>+</sup>  |
| 28 | 301.1 | 2.9E+03   | Hydroxystearic acid              | C18H36O3              | [M+H] <sup>+</sup>  |
| 29 | 303.0 | 3.2E+03   | Quercetin                        | C15H10O7              | [M+H] <sup>+</sup>  |
| 30 | 305.0 | 3.4E+03   | Oleic Acid                       | C18H34O2              | [M+Na] <sup>+</sup> |
| 31 | 306.9 | 4.2E+03   | Stearic acid                     | C18H36O2              | [M+Na] <sup>+</sup> |
| 32 | 309.1 | 2.2E+03   | Fructoselysine                   | C12H24N2O7            | [M+H] <sup>+</sup>  |
| 33 | 315.0 | 3.2E+03   | Octadecanedioic acid             | C18H34O4              | [M+H] <sup>+</sup>  |
| 34 | 317.0 | 3.8E+03   | Octadienoic acid, methyl ester   | C19H34O2              | [M+Na] <sup>+</sup> |
| 35 | 318.9 | 3.2E+03   | Myricetin (triacytylxyloside)    | C19H36O2              | [M+H] <sup>+</sup>  |
| 36 | 321.0 | 1.2E+03   | Octadecanoic acid, methyl ester  | C19H38O2              | [M+Na] <sup>+</sup> |
| 37 | 322.9 | 3.4E+03   | Trimethoxyflavan                 | C18H20O4              | [M+Na] <sup>+</sup> |
| 38 | 324.9 | 3.2E+03   | Fructofuranose dianhydride       | C12H20O10             | [M+H] <sup>+</sup>  |
| 39 | 327.0 | 3.2E+03   | Octadecanoic acid, methyl ester  | C19H38O2              | [M+Na] <sup>+</sup> |
| 40 | 337.0 | 4.4E+03   | Octadecanoic acid, methyl ester  | C19H38O2              | [M+K] <sup>+</sup>  |
| 41 | 339.0 | 4.4E+03   | Dihydroxy stearic acid           | C18H36O4              | [M+Na] <sup>+</sup> |
| 42 | 341.0 | 3.0E+03   | Trihydroxy-dimethoxyisoflavan    | C17H18O6              | [M+Na] <sup>+</sup> |
| 43 | 346.9 | 3.7E+03   | Portulacaxanthin I               | C14H16N2O7            | [M+Na] <sup>+</sup> |
| 44 | 348.9 | 2.3E+03   | Trihydroxy-prenyldihydrochalcone | C20H22O4              | [M+Na] <sup>+</sup> |
| 45 | 351.0 | 3.8E+03   | MG(16:1/0:0/0:0)                 | C19H36O4              | [M+Na] <sup>+</sup> |
| 46 | 353.0 | 5.5E+03   | MG(16:0/0:0/0:0)                 | C19H38O4              | [M+Na] <sup>+</sup> |
| 47 | 359.0 | 2.1E+03   | Catharanthine                    | C21H24N2O2            | [M+Na] <sup>+</sup> |
| 48 | 362.9 | 3.0E+03   | Neobanol                         | C18H12O6              | [M+Na] <sup>+</sup> |
| 49 | 365.0 | 8.1E+03   | Disaccharide                     | C12H22O11             | [M+Na] <sup>+</sup> |
| 50 | 367.0 | 4.2E+03   | Hydroxydocosahexaenoic acid      | C22H32O3              | [M+Na] <sup>+</sup> |
| 51 | 369.0 | 4.7E+03   | MG(0:0/16:0/0:0)                 | C19H38O4              | [M+K] <sup>+</sup>  |
| 52 | 371.1 | 3.7E+03   | Docosanedioic acid               | C22H42O4              | [M+H] <sup>+</sup>  |

Table S7: Untargeted metabolic profiling of Goji Berries leaves organic extracts by ESI(+) Ion Trap MS<sup>a</sup>

| #  | m/z   | Intensity | Putative Annotation <sup>b</sup>                   | Molecular formula (M) | Ion                 |
|----|-------|-----------|----------------------------------------------------|-----------------------|---------------------|
| 53 | 377.0 | 8.5E+03   | Chlorogenic acid                                   | C16H18O9              | [M+Na] <sup>+</sup> |
| 54 | 379.1 | 3.1E+03   | O-Feruloyl-Dglucose Dihydroxymethoxy               | C16H20O9              | [M+Na] <sup>+</sup> |
| 55 | 381.0 | 8.1E+03   | Disaccharide                                       | C12H22O11             | [M+K] <sup>+</sup>  |
| 56 | 383.0 | 4.1E+03   | Mycocerosic acid                                   | C25H50O2              | [M+H] <sup>+</sup>  |
| 57 | 385.0 | 4.1E+03   | Dihydroxy-tetramethoxyisoflavan                    | C19H22O7              | [M+Na] <sup>+</sup> |
| 58 | 387.0 | 3.3E+03   | Anacardic acid                                     | C22H36O3              | [M+K] <sup>+</sup>  |
| 59 | 389.1 | 2.2E+03   | Tetracosenoic acid                                 | C24H46O2              | [M+Na] <sup>+</sup> |
| 60 | 391.1 | 3.9E+03   | Diisooctyl phthalate                               | C24H38O4              | [M+H] <sup>+</sup>  |
| 61 | 393.1 | 6.2E+03   | Pentahydroxy-trimethoxyflavone                     | C18H16O10             | [M+H] <sup>+</sup>  |
| 62 | 395.0 | 4.4E+03   | Hydroxy-trimethoxy-methylenedioxyflavone           | C19H16O8              | [M+Na] <sup>+</sup> |
| 63 | 397.0 | 4.5E+03   | Dihydroxy-tetramethoxyflavone                      | C19H18O8              | [M+Na] <sup>+</sup> |
| 64 | 399.0 | 4.5E+03   | Hydroxy-pentamethoxyisoflavan                      | C20H24O7              | [M+Na] <sup>+</sup> |
| 65 | 401.0 | 4.9E+03   | Dihydroxy-methoxy- (hydroxybenzyl) dihydrochalcone | C19H22O8              | [M+Na] <sup>+</sup> |
| 66 | 405.1 | 2.4E+03   | Glucopyranuronic acid                              | C19H26O8              | [M+Na] <sup>+</sup> |
| 67 | 407.1 | 5.2E+03   | Dihydroxy-dimethoxy-prenylflavanone                | C22H24O6              | [M+Na] <sup>+</sup> |
| 68 | 409.0 | 7.9E+03   | Dioxocholenoic Acid                                | C24H34O4              | [M+Na] <sup>+</sup> |
| 69 | 413.1 | 1.3E+04   | Rehmaionoside B                                    | C19H34O8              | [M+Na] <sup>+</sup> |
| 70 | 417.0 | 2.7E+03   | Hydroxyeicosatetraenoate glyceryl ester            | C23H38O5              | [M+H] <sup>+</sup>  |
| 71 | 419.0 | 2.3E+03   | Palmitoyl glucuronide                              | C22H42O7              | [M+H] <sup>+</sup>  |
| 72 | 421.1 | 5.6E+03   | Tetracosanedioic acid                              | C24H46O4              | [M+Na] <sup>+</sup> |
| 73 | 425.0 | 5.0E+03   | Octacosanoic acid                                  | C28H56O2              | [M+H] <sup>+</sup>  |
| 74 | 427.0 | 4.2E+03   | Hydroxy-didehydrovitamin D3 lactone                | C27H38O4              | [M+H] <sup>+</sup>  |
| 75 | 429.1 | 3.9E+04   | Isomontanolid                                      | C22H30O7              | [M+Na] <sup>+</sup> |
| 76 | 433.1 | 3.5E+03   | Hexacosenoic acid                                  | C26H50O2              | [M+K] <sup>+</sup>  |
| 77 | 435.1 | 3.7E+03   | Ficosterol                                         | C29H48O               | [M+Na] <sup>+</sup> |
| 78 | 437.0 | 7.3E+03   | Tridecyl oleate                                    | C29H56O2              | [M+H] <sup>+</sup>  |

Table S7: Untargeted metabolic profiling of Goji Berries leaves organic extracts by ESI(+) Ion Trap MS<sup>a</sup>

| #   | m/z   | Intensity | Putative Annotation <sup>b</sup>                       | Molecular formula (M) | Ion                 |
|-----|-------|-----------|--------------------------------------------------------|-----------------------|---------------------|
| 79  | 439.0 | 5.3E+03   | Calcitriol                                             | C27H44O3              | [M+Na] <sup>+</sup> |
| 80  | 443.1 | 5.4E+03   | Glycyphyllin                                           | C21H24O9              | [M+Na] <sup>+</sup> |
| 81  | 445.1 | 6.8E+03   | Trihydroxy-oxo-cholanoic Acid                          | C24H38O6              | [M+Na] <sup>+</sup> |
| 82  | 447.1 | 3.8E+03   | Alpha-Tocotrienol                                      | C29H44O2              | [M+Na] <sup>+</sup> |
| 83  | 449.1 | 6.6E+03   | Luteolin 7-O-glucoside                                 | C21H20O11             | [M+H] <sup>+</sup>  |
| 84  | 453.0 | 1.7E+04   | Tetradecyl-hexadecanoate                               | C30H60O2              | [M+H] <sup>+</sup>  |
| 85  | 455.0 | 6.7E+03   | Diaponeurosporenic acid                                | C30H40O2              | [M+Na] <sup>+</sup> |
| 86  | 457.0 | 1.0E+04   | Heptamethoxyflavanone                                  | C22H26O9              | [M+Na] <sup>+</sup> |
| 87  | 463.0 | 6.2E+03   | Methylcycloartaenol                                    | C31H52O               | [M+Na] <sup>+</sup> |
| 88  | 465.0 | 7.7E+03   | Isoquercetin                                           | C21H20O12             | [M+H] <sup>+</sup>  |
| 89  | 467.0 | 4.4E+03   | Dihydrophaseic acid O-beta-D-glucoside                 | C21H32O10             | [M+Na] <sup>+</sup> |
| 90  | 469.0 | 7.8E+03   | Catechinol O-beta-D-galactopyranoside                  | C21H24O12             | [M+H] <sup>+</sup>  |
| 91  | 471.0 | 4.1E+03   | D-Galactosyl-3-(N-acetyl-beta-Dgalactosaminy)-L serine | C17H30N2O13           | [M+H] <sup>+</sup>  |
| 92  | 475.0 | 4.2E+03   | Phylloquinol                                           | C31H48O2              | [M+Na] <sup>+</sup> |
| 93  | 477.1 | 7.8E+03   | Tetrahydrogeranylgeranyl diphosphate                   | C20H40O7P2            | [M+Na] <sup>+</sup> |
| 94  | 479.1 | 5.0E+03   | Palmityl oleate                                        | C32H62O2              | [M+H] <sup>+</sup>  |
| 95  | 481.1 | 6.5E+03   | Hexahydroxyflavone 3-glucoside                         | C21H20O13             | [M+H] <sup>+</sup>  |
| 96  | 483.0 | 2.5E+03   | 6-Acetylpicropolin                                     | C24H28O9              | [M+Na] <sup>+</sup> |
| 97  | 485.1 | 8.0E+03   | Digalloyl-beta-D-glucose                               | C20H20O14             | [M+H] <sup>+</sup>  |
| 98  | 487.1 | 3.9E+03   | Tetramethyl-hexacosadienoic acid                       | C30H56O2              | [M+K] <sup>+</sup>  |
| 99  | 493.0 | 1.7E+04   | Limonin                                                | C26H30O8              | [M+Na] <sup>+</sup> |
| 100 | 497.1 | 6.6E+03   | PG(17:1/0:0)                                           | C23H45O9P             | [M+H] <sup>+</sup>  |
| 101 | 499.1 | 4.7E+03   | PG(17:0/0:0)                                           | C23H47O9P             | [M+H] <sup>+</sup>  |
| 102 | 503.1 | 5.7E+03   | Epi-Brassinolide                                       | C28H48O6              | [M+Na] <sup>+</sup> |
| 103 | 507.1 | 6.2E+03   | Stearyl oleate                                         | C34H66O2              | [M+H] <sup>+</sup>  |
| 104 | 509.1 | 2.5E+04   | Trihydroxy-prenylchalcone O-glucoside                  | C26H30O9              | [M+Na] <sup>+</sup> |

Table S7: Untargeted metabolic profiling of Goji Berries leaves organic extracts by ESI(+) Ion Trap MS<sup>a</sup>

| #   | m/z   | Intensity | Putative Annotation <sup>b</sup>      | Molecular formula (M) | Ion                 |
|-----|-------|-----------|---------------------------------------|-----------------------|---------------------|
| 105 | 511.1 | 6.5E+03   | PG(18:1(9Z)/0:0)                      | C24H47O9P             | [M+H] <sup>+</sup>  |
| 106 | 513.1 | 4.3E+03   | Raucaffricine                         | C27H32N2O8            | [M+H] <sup>+</sup>  |
| 107 | 519.1 | 7.6E+03   | Tetratriacontahexaenoic acid          | C34H56O2              | [M+Na] <sup>+</sup> |
| 108 | 521.1 | 5.0E+03   | Triacontanedioic acid                 | C30H58O4              | [M+K] <sup>+</sup>  |
| 109 | 523.1 | 7.7E+03   | Tetratriacontatetraenoic acid         | C34H60O2              | [M+Na] <sup>+</sup> |
| 110 | 525.1 | 3.1E+04   | Geranioloxyalatum flavone             | C27H34O9              | [M+Na] <sup>+</sup> |
| 111 | 527.1 | 6.8E+03   | Trisaccharide                         | C18H32O16             | [M+Na] <sup>+</sup> |
| 112 | 531.1 | 5.2E+03   | Mucronine B                           | C28H36N4O4            | [M+K] <sup>+</sup>  |
| 113 | 533.1 | 9.9E+03   | DG(14:1/14:0/0:0)                     | C31H58O5              | [M+Na] <sup>+</sup> |
| 114 | 535.1 | 5.4E+03   | Trihydroxyecdysone                    | C27H44O9              | [M+Na] <sup>+</sup> |
| 115 | 536.1 | 6.3E+03   | PC(P-20:0/0:0)                        | C28H58NO6P            | [M+H] <sup>+</sup>  |
| 116 | 537.1 | 5.7E+03   | Phthioceranic acid (C36)              | C36H72O2              | [M+H] <sup>+</sup>  |
| 117 | 539.1 | 5.3E+03   | L-Olivosyl-oleandolide                | C26H44O10             | [M+Na] <sup>+</sup> |
| 118 | 544.0 | 3.0E+03   | Ophrysanthin                          | C23H21O14             | [M+Na] <sup>+</sup> |
| 119 | 545.1 | 5.6E+03   | Trilobolide                           | C27H38O10             | [M+Na] <sup>+</sup> |
| 120 | 549.1 | 5.4E+03   | Heneicosanyl oleate                   | C37H72O2              | [M+H] <sup>+</sup>  |
| 121 | 551.1 | 4.2E+03   | Tetradecenyl-octadecenoyl-sn-glycerol | C35H66O4              | [M+H] <sup>+</sup>  |
| 122 | 557.1 | 3.5E+03   | PG(20:3/0:0)                          | C26H47O9P             | [M+Na] <sup>+</sup> |
| 123 | 558.2 | 3.5E+03   | Cyanidin (malonylglucoside)           | C24H23O14             | [M+Na] <sup>+</sup> |
| 124 | 559.2 | 3.9E+03   | DG(14:1/16:1/0:0)                     | C33H60O5              | [M+Na] <sup>+</sup> |
| 125 | 561.2 | 7.4E+03   | DG(14:0/16:1/0:0)                     | C33H62O5              | [M+Na] <sup>+</sup> |
| 126 | 563.1 | 9.4E+03   | DG(14:0/16:0/0:0)                     | C33H64O5              | [M+Na] <sup>+</sup> |
| 127 | 565.2 | 5.6E+03   | Cortolone-3-glucuronide               | C27H42O11             | [M+Na] <sup>+</sup> |
| 128 | 575.2 | 4.2E+03   | DG(15:0/16:1/0:0)                     | C34H64O5              | [M+Na] <sup>+</sup> |
| 129 | 577.2 | 9.4E+03   | DG(15:0/16:0/0:0)                     | C34H66O5              | [M+Na] <sup>+</sup> |
| 130 | 579.2 | 5.5E+03   | PA(O-16:0/12:0)                       | C31H63O7P             | [M+H] <sup>+</sup>  |

Table S7: Untargeted metabolic profiling of Goji Berries leaves organic extracts by ESI(+) Ion Trap MS<sup>a</sup>

| #   | m/z   | Intensity | Putative Annotation <sup>b</sup>        | Molecular formula (M) | Ion                 |
|-----|-------|-----------|-----------------------------------------|-----------------------|---------------------|
| 131 | 587.2 | 5.0E+03   | DG(14:0/18:2/0:0)                       | C35H64O5              | [M+Na] <sup>+</sup> |
| 132 | 591.2 | 6.4E+03   | DG(14:0/18:0/0:0)                       | C35H68O5              | [M+Na] <sup>+</sup> |
| 133 | 593.1 | 5.0E+03   | PA(O-16:0/13:0)                         | C32H65O7P             | [M+H] <sup>+</sup>  |
| 134 | 599.2 | 5.1E+03   | DG(15:0/18:3/0:0)                       | C36H64O5              | [M+Na] <sup>+</sup> |
| 135 | 601.2 | 9.8E+03   | DG(15:0/18:2/0:0)                       | C36H66O5              | [M+Na] <sup>+</sup> |
| 136 | 603.2 | 6.1E+03   | DG(15:0/18:1/0:0)                       | C36H68O5              | [M+Na] <sup>+</sup> |
| 137 | 605.2 | 7.9E+03   | DG(15:0/18:0/0:0)                       | C36H70O5              | [M+Na] <sup>+</sup> |
| 138 | 607.2 | 5.8E+03   | PA(O-16:0/14:0)                         | C33H67O7P             | [M+H] <sup>+</sup>  |
| 139 | 611.2 | 3.3E+03   | Rutin                                   | C27H30O16             | [M+H] <sup>+</sup>  |
| 140 | 613.3 | 6.9E+03   | DG(14:0/20:3/0:0)                       | C37H66O5              | [M+Na] <sup>+</sup> |
| 141 | 615.3 | 7.7E+03   | Myricetin (triacylxyloside)             | C26H24O15             | [M+K] <sup>+</sup>  |
| 142 | 617.2 | 5.1E+03   | PA(P-16:0/15:1)                         | C34H65O7P             | [M+H] <sup>+</sup>  |
| 143 | 619.3 | 4.4E+03   | O-[beta-D-glucopyranosyl]-furostantriol | C33H56O9              | [M+Na] <sup>+</sup> |
| 144 | 621.2 | 7.4E+03   | PA(O-16:0/15:0)                         | C34H69O7P             | [M+H] <sup>+</sup>  |
| 145 | 625.3 | 3.0E+03   | Avermectin A2b aglycone                 | C34H50O9              | [M+Na] <sup>+</sup> |
| 146 | 629.2 | 1.0E+04   | DG(14:0/20:3/0:0)                       | C37H66O5              | [M+K] <sup>+</sup>  |
| 147 | 631.2 | 8.3E+03   | DG(15:0/20:1/0:0)                       | C38H72O5              | [M+Na] <sup>+</sup> |
| 148 | 633.2 | 4.9E+03   | DG(15:0/20:0/0:0)                       | C38H74O5              | [M+Na] <sup>+</sup> |
| 149 | 635.2 | 5.3E+03   | DG(14:0/22:6/0:0)                       | C39H64O5              | [M+Na] <sup>+</sup> |
| 150 | 637.2 | 5.2E+03   | DG(14:0/22:5/0:0)                       | C39H66O5              | [M+Na] <sup>+</sup> |
| 151 | 639.2 | 5.6E+03   | DG(14:0/22:4/0:0)                       | C39H68O5              | [M+Na] <sup>+</sup> |
| 152 | 641.3 | 2.5E+03   | DG(14:1/22:2/0:0)                       | C39H70O5              | [M+Na] <sup>+</sup> |
| 153 | 643.1 | 2.2E+03   | DG(14:0/22:2/0:0)                       | C39H72O5              | [M+Na] <sup>+</sup> |
| 154 | 645.2 | 2.5E+03   | DG(14:0/22:1/0:0)                       | C39H74O5              | [M+Na] <sup>+</sup> |
| 155 | 647.1 | 2.1E+03   | DG(14:0/22:0/0:0)                       | C39H76O5              | [M+Na] <sup>+</sup> |
| 156 | 649.2 | 5.7E+03   | PA(O-16:0/17:0)                         | C36H73O7P             | [M+H] <sup>+</sup>  |

Table S7: Untargeted metabolic profiling of Goji Berries leaves organic extracts by ESI(+) Ion Trap MS<sup>a</sup>

| #   | m/z   | Intensity | Putative Annotation <sup>b</sup>                         | Molecular formula (M) | Ion                 |
|-----|-------|-----------|----------------------------------------------------------|-----------------------|---------------------|
| 157 | 651.3 | 6.9E+03   | PI(P-20:0/0:0)                                           | C29H57O11P            | [M+K] <sup>+</sup>  |
| 158 | 653.1 | 3.2E+04   | PG(12:0/15:0)                                            | C33H65O10P            | [M+H] <sup>+</sup>  |
| 159 | 655.2 | 8.3E+03   | PA(O-16:0/18:4)                                          | C37H67O7P             | [M+H] <sup>+</sup>  |
| 160 | 657.2 | 4.8E+03   | PA(O-16:0/18:3)                                          | C37H69O7P             | [M+H] <sup>+</sup>  |
| 161 | 659.3 | 3.3E+03   | PA(O-16:0/18:2)                                          | C37H71O7P             | [M+H] <sup>+</sup>  |
| 162 | 661.2 | 2.7E+03   | PA(O-16:0/18:1)                                          | C37H73O7P             | [M+H] <sup>+</sup>  |
| 163 | 663.2 | 3.7E+03   | PA(16:0e/18:0)                                           | C37H75O7P             | [M+H] <sup>+</sup>  |
| 164 | 665.2 | 5.3E+03   | DG(16:0/22:5/0:0)                                        | C41H70O5              | [M+Na] <sup>+</sup> |
| 165 | 667.3 | 5.1E+03   | PI(22:6/0:0)                                             | C31H49O12P            | [M+Na] <sup>+</sup> |
| 166 | 669.1 | 3.6E+04   | (O-galactopyranosyl)-keto-triacontanetriol               | C36H70O9              | [M+Na] <sup>+</sup> |
| 167 | 679.1 | 2.8E+03   | PG(12:0/17:1)                                            | C35H67O10P            | [M+H] <sup>+</sup>  |
| 168 | 681.2 | 1.9E+03   | PG(12:0/17:0)                                            | C35H69O10P            | [M+H] <sup>+</sup>  |
| 169 | 685.2 | 4.9E+03   | PA(O-16:0/20:3)                                          | C39H73O7P             | [M+H] <sup>+</sup>  |
| 170 | 689.1 | 8.6E+03   | PA(O-16:0/20:1)                                          | C39H77O7P             | [M+H] <sup>+</sup>  |
| 171 | 691.2 | 2.7E+03   | PA(O-16:0/20:0)                                          | C39H79O7P             | [M+H] <sup>+</sup>  |
| 172 | 693.2 | 3.9E+03   | PG(12:0/18:1)                                            | C36H69O10P            | [M+H] <sup>+</sup>  |
| 173 | 695.2 | 2.4E+03   | PG(12:0/18:0)                                            | C36H71O10P            | [M+H] <sup>+</sup>  |
| 174 | 703.1 | 2.8E+03   | PA(14:0/22:1)                                            | C39H75O8P             | [M+H] <sup>+</sup>  |
| 175 | 707.2 | 2.0E+03   | PG(12:0/19:1)                                            | C37H71O10P            | [M+H] <sup>+</sup>  |
| 176 | 715.2 | 2.2E+03   | Scillaren A                                              | C36H52O13             | [M+Na] <sup>+</sup> |
| 177 | 717.2 | 1.7E+03   | PA(O-16:0/22:1)                                          | C41H81O7P             | [M+H] <sup>+</sup>  |
| 178 | 719.2 | 2.0E+03   | PA(O-16:0/22:0)                                          | C41H83O7P             | [M+H] <sup>+</sup>  |
| 179 | 721.3 | 2.0E+03   | PG(12:0/20:1)                                            | C38H73O10P            | [M+H] <sup>+</sup>  |
| 180 | 735.3 | 2.2E+03   | PG(13:0/20:1)                                            | C39H75O10P            | [M+H] <sup>+</sup>  |
| 181 | 737.3 | 3.3E+03   | O-glucopyranosyl-(hexadecanoyloxy)-eicosanol             | C42H82O8              | [M+Na] <sup>+</sup> |
| 182 | 749.2 | 2.0E+03   | Hexadecanoyl-(octadecenoyl)-sn-glycerophosphosn-glycerol | C40H77O10P            | [M+H] <sup>+</sup>  |

Table S7: Untargeted metabolic profiling of Goji Berries leaves organic extracts by ESI(+) Ion Trap MS<sup>a</sup>

| #   | m/z   | Intensity | Putative Annotation <sup>b</sup> | Molecular formula (M) | Ion                 |
|-----|-------|-----------|----------------------------------|-----------------------|---------------------|
| 183 | 767.2 | 1.7E+03   | PG(P-18:0/17:2)                  | C41H77O9P             | [M+Na] <sup>+</sup> |
| 184 | 770.3 | 7.4E+03   | GalCer(d16:1/23:0)               | C45H87NO8             | [M+H] <sup>+</sup>  |
| 185 | 771.2 | 3.1E+03   | PA(19:0/22:2)                    | C44H83O8P             | [M+H] <sup>+</sup>  |
| 186 | 773.2 | 1.6E+03   | DG(22:6/24:1/0:0)                | C49H82O5              | [M+Na] <sup>+</sup> |
| 187 | 781.2 | 2.5E+03   | PI(12:0/18:1)                    | C39H73O13P            | [M+H] <sup>+</sup>  |
| 188 | 785.2 | 2.2E+04   | PA(20:0/22:2)                    | C45H85O8P             | [M+H] <sup>+</sup>  |
| 189 | 787.2 | 7.8E+03   | PA(20:0/22:1)                    | C45H87O8P             | [M+H] <sup>+</sup>  |
| 190 | 796.3 | 4.0E+03   | GalCer(d18:2/23:0)               | C47H89NO8             | [M+H] <sup>+</sup>  |
| 191 | 797.3 | 1.6E+04   | TG(16:1/14:0/16:1)               | C49H90O6              | [M+Na] <sup>+</sup> |
| 192 | 798.3 | 7.2E+03   | GalCer(d18:1/23:0)               | C47H91NO8             | [M+H] <sup>+</sup>  |
| 193 | 799.3 | 3.6E+03   | TG(16:0/14:0/16:1)               | C49H92O6              | [M+Na] <sup>+</sup> |
| 194 | 802.3 | 1.3E+03   | PE(16:0/22:6)                    | C43H74NO9P            | [M+Na] <sup>+</sup> |
| 195 | 803.3 | 3.4E+03   | PA(21:0/22:0)                    | C46H91O8P             | [M+H] <sup>+</sup>  |
| 196 | 812.3 | 2.4E+03   | PE(20:4/22:6)                    | C47H74NO8P            | [M+H] <sup>+</sup>  |
| 197 | 813.2 | 2.4E+04   | PA(22:0/22:2)                    | C47H89O8P             | [M+H] <sup>+</sup>  |
| 198 | 814.2 | 1.1E+04   | PA(22:0/22:0)                    | C47H93O8P             | [M+H] <sup>+</sup>  |
| 199 | 871.5 | 1.9E+03   | Pheophytin a                     | C55H74N4O5            | [M+H] <sup>+</sup>  |
| 200 | 893.3 | 1.1E+03   | Chlorophyll a                    | C55H72O5N4Mg          | [M+H] <sup>+</sup>  |
| 201 | 909.2 | 8.9E+02   | Pheophytin a                     | C55H74N4O5            | [M+K] <sup>+</sup>  |
| 202 | 915.3 | 6.4E+02   | Chlorophyll a                    | C55H72O5N4Mg          | [M+Na] <sup>+</sup> |

<sup>a</sup> Experiments carried out by ESI(+) Esquire 6000 MS

<sup>b</sup> MG Monoacylglycerol; DG Diacylglycerol; TG Triacylglycerol; GalCer Galactosylceramide; PA Phosphatidic acid; PC Phosphatidylcholine; PE Phosphatidylethanolamine; PG Glycerophospholipids; PI Phosphatidylinositol.

Table S8: Untargeted metabolic profiling of Goji Berries leaves organic extracts by ESI(-) Ion Trap MS<sup>a</sup>

| #  | m/z   | Intensity | Putative Annotation <sup>b</sup> | Molecular Formula (M) | Ion     |
|----|-------|-----------|----------------------------------|-----------------------|---------|
| 1  | 110.8 | 1.6E+03   | 2-Furoic acid                    | C5H4O3                | [M-H]-  |
| 2  | 127.8 | 3.3E+03   | Pyroglutamic acid                | C5H7NO3               | [M-H]-  |
| 3  | 133.8 | 1.1E+03   | Malic acid                       | C4H6O5                | [M-H]   |
| 4  | 144.8 | 9.4E+02   | Glutamine                        | C5H10N2O3             | [M-H]-  |
| 5  | 156.8 | 2.1E+03   | Methyl-octanoic acid             | C9H18O2               | [M-H]-  |
| 6  | 158.7 | 1.7E+03   | Pimelic acid                     | C7H12O4               | [M-H]-  |
| 7  | 160.7 | 1.7E+03   | Hydroxyadipic acid               | C6H10O5               | [M-H]-  |
| 8  | 168.8 | 2.8E+03   | Citronellic acid                 | C10H18O2              | [M-H]-  |
| 9  | 170.9 | 3.4E+03   | Decanoic acid                    | C10H20O2              | [M-H]-  |
| 10 | 172.8 | 1.9E+03   | Shikimic acid                    | C7H10O5               | [M-H]-  |
| 11 | 178.8 | 9.7E+02   | Aldohexose                       | C6H12O6               | [M-H]-  |
| 12 | 184.8 | 1.2E+03   | Tartaric acid                    | C4H6O6                | [M+Cl]- |
| 13 | 185.9 | 3.3E+03   | hydroxy-2-decenoic acid          | C10H18O3              | [M-H]-  |
| 14 | 186.9 | 3.3E+03   | Hydroxy-decanoic acid            | C10H20O3              | [M-H]-  |
| 15 | 200.8 | 1.6E+03   | Sebacic acid                     | C10H18O4              | [M-H]-  |
| 16 | 204.9 | 1.2E+03   | Methylcitric acid                | C7H10O7               | [M-H]-  |
| 17 | 210.8 | 9.2E+02   | Methyl-dodecenoic acid           | C13H24O2              | [M-H]-  |
| 18 | 212.9 | 3.1E+03   | Methyl-dodecanoic acid           | C13H26O2              | [M-H]-  |
| 19 | 214.9 | 9.4E+02   | Hexose                           | C6H12O6               | [M+Cl]- |
| 20 | 225.0 | 4.3E+03   | Myristoleic acid                 | C14H26O2              | [M-H]-  |
| 21 | 227.0 | 7.6E+04   | Myristic acid                    | C14H28O2              | [M-H]-  |
| 22 | 229.0 | 1.6E+03   | Dodecanedioic acid               | C12H22O4              | [M-H]-  |
| 23 | 239.0 | 5.9E+03   | Tridecenyl acetate               | C15H28O2              | [M-H]-  |
| 24 | 241.0 | 2.7E+04   | Methyl myristic acid             | C15H30O2              | [M-H]-  |
| 25 | 242.9 | 1.3E+03   | Methyl-dodecanedioic acid        | C13H24O4              | [M-H]-  |



Table S8: Untargeted metabolic profiling of Goji Berries leaves organic extracts by ESI(-) Ion Trap MS<sup>a</sup>

| #  | m/z   | Intensity | Putative Annotation <sup>b</sup>   | Molecular Formula (M) | Ion    |
|----|-------|-----------|------------------------------------|-----------------------|--------|
| 26 | 250.9 | 1.3E+03   | Hexadecynoic acid                  | C16H28O2              | [M-H]- |
| 27 | 253.0 | 4.5E+04   | Palmitoleic acid                   | C16H30O2              | [M-H]- |
| 28 | 255.0 | 1.0E+05   | Palmitic acid                      | C16H32O2              | [M-H]- |
| 29 | 256.9 | 2.3E+03   | Tetradecanedioic acid              | C14H26O4              | [M-H]- |
| 30 | 264.9 | 4.0E+04   | Methyl-Hexadecadienoic acid        | C17H30O2              | [M-H]- |
| 31 | 267.0 | 1.3E+04   | Methyl-hexadecenoic acid           | C17H32O2              | [M-H]- |
| 32 | 269.0 | 1.4E+04   | Methyl palmitic acid               | C17H34O2              | [M-H]- |
| 33 | 271.0 | 1.7E+03   | Hydroxy palmitic acid              | C16H32O3              | [M-H]- |
| 34 | 276.9 | 5.8E+03   | Linolenic acid                     | C18H30O2              | [M-H]- |
| 35 | 279.0 | 1.2E+04   | Linoleic acid                      | C18H32O2              | [M-H]- |
| 36 | 281.0 | 3.5E+04   | Oleic acid                         | C18H34O2              | [M-H]- |
| 37 | 283.0 | 5.2E+04   | Stearic acid                       | C18H36O2              | [M-H]- |
| 38 | 285.0 | 2.2E+03   | Hydroxy-palmitic acid methyl ester | C17H34O3              | [M-H]- |
| 39 | 292.9 | 1.3E+04   | Methyl-octadecadienoic acid        | C19H34O2              | [M-H]- |
| 40 | 295.0 | 3.2E+03   | Methyl-octadecenoic acid           | C19H36O2              | [M-H]- |
| 41 | 297.0 | 6.2E+03   | Methyl stearic acid                | C19H38O2              | [M-H]- |
| 42 | 299.0 | 1.7E+03   | Hydroxystearic acid                | C18H36O3              | [M-H]- |
| 43 | 305.0 | 2.4E+03   | Linolenic acid, ethyl ester        | C20H34O2              | [M-H]- |
| 44 | 307.0 | 1.7E+03   | Eicosadienoic acid                 | C20H36O2              | [M-H]- |
| 45 | 309.0 | 1.1E+04   | Eicosenoic acid                    | C20H38O2              | [M-H]- |
| 46 | 311.0 | 1.3E+04   | Arachidic acid                     | C20H40O2              | [M-H]- |
| 47 | 312.9 | 1.6E+03   | Dihydroxy-octadecenoic acid        | C18H34O4              | [M-H]- |
| 48 | 314.9 | 1.4E+03   | Dihydroxy-octadecanoic acid        | C18H36O4              | [M-H]- |
| 49 | 321.0 | 1.8E+03   | Eicosadienoic acid, methyl ester   | C21H38O2              | [M-H]- |
| 50 | 322.9 | 1.9E+03   | Eicosenoic acid, methyl ester      | C21H40O2              | [M-H]- |
| 51 | 325.0 | 1.1E+04   | Eicosanoic acid, methyl ester      | C21H42O2              | [M-H]- |

Table S8: Untargeted metabolic profiling of Goji Berries leaves organic extracts by ESI(-) Ion Trap MS<sup>a</sup>

| #  | m/z   | Intensity | Putative Annotation <sup>b</sup> | Molecular Formula (M) | Ion     |
|----|-------|-----------|----------------------------------|-----------------------|---------|
| 52 | 326.9 | 2.3E+03   | Hydroxy-eicosanoic acid          | C20H40O3              | [M-H]-  |
| 53 | 337.0 | 4.8E+03   | Docosenoic acid                  | C22H42O2              | [M-H]-  |
| 54 | 339.0 | 8.5E+03   | Docosanoic acid (22:0)           | C22H44O2              | [M-H]-  |
| 55 | 340.9 | 2.6E+03   | Eicosanedioic acid               | C20H38O4              | [M-H]-  |
| 56 | 345.8 | 9.1E+02   | Deoxyguanosine 5'-monophosphate  | C10H14N5O7P           | [M-H]-  |
| 57 | 353.0 | 7.1E+03   | Chlorogenic acid                 | C16H18O9              | [M-H]-  |
| 58 | 355.0 | 1.6E+03   | Hydroxydocosanoic acid           | C22H44O3              | [M-H]   |
| 59 | 365.0 | 9.1E+02   | Docosenyl acetate                | C24H46O2              | [M-H]-  |
| 60 | 367.1 | 4.3E+03   | Tetracosanoic acid               | C24H48O2              | [M-H]-  |
| 61 | 369.1 | 1.7E+03   | Docosanedioic acid               | C22H42O4              | [M-H]-  |
| 62 | 371.1 | 1.3E+03   | Deoxyoleandolide                 | C20H36O6              | [M-H]-  |
| 63 | 381.1 | 3.6E+03   | Heptadecenyl-resorcinol          | C23H38O2              | [M+Cl]- |
| 64 | 383.1 | 1.7E+03   | Sativic acid                     | C18H36O6              | [M+Cl]- |
| 65 | 395.2 | 2.7E+03   | Methyl-hexacosanoic acid         | C26H52O2              | [M-H]-  |
| 66 | 397.0 | 5.1E+03   | Tetracosanedioic acid            | C24H46O4              | [M-H]-  |
| 67 | 399.0 | 1.1E+03   | Didecanoylglycerol               | C23H44O5              | [M-H]-  |
| 68 | 411.1 | 1.4E+03   | Hydroxyhexacosanoic acid         | C26H52O3              | [M-H]-  |
| 69 | 415.0 | 9.6E+02   | Calcitriol                       | C27H44O3              | [M-H]-  |
| 70 | 421.0 | 1.0E+03   | Octacosenoic acid                | C28H54O2              | [M-H]   |
| 71 | 425.1 | 2.4E+03   | Hexacosanedioic acid             | C26H50O4              | [M-H]-  |
| 72 | 431.0 | 1.2E+03   | Calcitrol                        | C27H44O4              | [M-H]-  |
| 73 | 439.2 | 1.5E+03   | Hydroxy-octacosanoic acid        | C28H56O3              | [M-H]-  |
| 74 | 441.1 | 2.5E+03   | N-linolenoyl-glutamine           | C23H38N2O4            | [M+Cl]- |
| 75 | 451.3 | 1.1E+03   | 6-C-Glucopyranosylcatechin       | C21H24O11             | [M-H]-  |
| 76 | 465.1 | 1.2E+03   | Methyl-triacontanoic acid        | C31H62O2              | [M-H]-  |
| 77 | 467.2 | 1.0E+03   | Catechinol O-galactopyranoside   | C21H24O12             | [M-H]-  |

Table S8: Untargeted metabolic profiling of Goji Berries leaves organic extracts by ESI(-) Ion Trap MS<sup>a</sup>

| #  | m/z   | Intensity | Putative Annotation <sup>b</sup>             | Molecular Formula (M) | Ion    |
|----|-------|-----------|----------------------------------------------|-----------------------|--------|
| 78 | 487.1 | 5.9E+03   | Fucosyllactose                               | C18H32O15             | [M-H]- |
| 79 | 529.2 | 1.0E+03   | Luteolin glucoside-4'-(methyl-butenate)      | C26H26O12             | [M-H]- |
| 80 | 623.2 | 9.3E+02   | Kanokoside D                                 | C27H44O16             | [M-H]- |
| 81 | 665.2 | 2.8E+03   | Maltotetraose                                | C24H42O21             | [M-H]  |
| 82 | 685.2 | 2.3E+03   | Glucopyranosyl-(tetradecanoyloxy)- eicosanol | C40H78O8              | [M-H]- |
| 83 | 695.3 | 2.5E+03   | Phylloflavanine                              | C35H32O13             | [M+Cl] |
| 84 | 741.3 | 2.6E+03   | Quercetin glucosyl-xylosyl-rhamnoside        | C32H38O20             | [M-H]- |

a Experiments carried out by ESI(+) Esquire 6000 MS

b MG Monoacylglycerol; DG Diacylglycerol; TG Triacylglycerol; GalCer Galactosylceramide; PA Phosphatidic acid; PC Phosphatidylcholine; PE Phosphatidylethanolamine; PG Glycerophospholipids; PI Phosphatidylinositol.
